# Supplementary material for: Comparative effectiveness of various physical exercise interventions on executive functions and related symptoms in children and adolescents with attention deficit hyperactivity disorder: A systematic review and network meta-analysis
Source: PubMed Central journal article supplement (PMC10080114; doi:10.3389/fpubh.2023.1133727), 2023-03-24
Supplement: Data_Sheet_2.pdf [file Data_Sheet_2.pdf]

## Appendix 2

### **Comparative effectiveness of various physical exercise interventions on executive functions and related symptoms in children and adolescents with attention deficit hyperactivity disorder: A systematic review and network meta-analysis**

Feilong Zhu<sup>1</sup>, Xiaotong Zhu<sup>1</sup>, Xiaoyu Bi<sup>1</sup>, Dongqing Kuang<sup>1</sup>, Boya Liu<sup>2</sup>, Jingyi Zhou<sup>1</sup>, Yiming Yang<sup>1</sup>, Yuanchun Ren<sup>1\*</sup>

<sup>1</sup> *College of Physical Education and Sports, Beijing Normal University, China*

<sup>2</sup> *School of Social Ecology, University of California, Irvine, USA*

\* Corresponding author

Yuanchun Ren

Email: [yuanchun-ren@bnu.edu.cn](mailto:yuanchun-ren@bnu.edu.cn)

## S1. Updated protocol

Table S1 Protocol deviations

| Section         | Previous protocol                                                                                                                                                                                                | Update                                                                                                                                                                                                                                    |
|-----------------|------------------------------------------------------------------------------------------------------------------------------------------------------------------------------------------------------------------|-------------------------------------------------------------------------------------------------------------------------------------------------------------------------------------------------------------------------------------------|
| Title           | Comparative efficacy of physical activity modalities in children and adolescents with attention deficit/hyperactivity disorder: A systematic review and network meta-analysis                                    | Comparative effectiveness of various physical exercise interventions on executive functions and related symptoms in children and adolescents with attention deficit hyperactivity disorder: A systematic review and network meta-analysis |
| Authors         | Feilong Zhu, Xiaotong Zhu, Yu Wu, Xiaoyu Bi, Dongqing Kuang, Yuanchun Ren                                                                                                                                        | Feilong Zhu, Xiaotong Zhu, Xiaoyu Bi, Dongqing Kuang, Boya Liu, Jingyi Zhou, Yuanchun Ren                                                                                                                                                 |
| Search strategy | With no limitation on language and publication data, the databases for Web of Science, PubMed, Embase, Cochrane Central Register of Controlled Trials, SPORTDiscus, PEDro, and clinical trials databases without | We searched the Web of Science, PubMed, Embase, Cochrane Central Register of Controlled Trials, SPORTDiscus, PsycINFO, CNKI and clinical trials databases without                                                                         |

ScienceDirect, PsycINFO and restrictions on language.

ClinicalTrials.gov was searched.

Study quality  
assessment

Risk of bias was assessed by 2 authors according to the Cochrane Collaboration's risk-of-bias tool, which consists of seven items: random sequence generation, allocation concealment, blinding of participants and personnel, blinding of outcome assessors, incomplete outcome data, incomplete outcome reporting, and other bias. The methodological quality of included randomized controlled trials and non-randomized controlled studies was assessed by 2 reviewers using the Physiotherapy Evidence Database scale (PEDro).

Data synthesis

No meta regression analysis. We also conducted meta regression analysis (with frequency, intensity, duration, and length of PA interventions as covariates) for the primary outcomes.

---

## S2. Search strategy

### PubMed 549

- #1 "Attention Deficit Disorder with Hyperactivity"[Mesh] OR Attention Deficit Disorders with Hyperactivity[tiab] OR Attention Deficit Hyperactivity Disorder\*[tiab] OR Hyperkinetic Syndrome\*[tiab] OR ADDH[tiab] OR ADHD[tiab] OR Attention Deficit Disorder\*[tiab] OR ADD[tiab] OR Hyperactivit\*[tiab] OR Inattenti\*[tiab] OR Impulsivit\*[tiab] OR attention-deficit hyperactivity disorder\*[tiab] OR Attention Deficit-Hyperactivity Disorder\*[tiab] OR Hyperkinet\*[tiab] OR Overactive\*[tiab]
- #2 "Exercise"[Mesh] OR "Sports"[Mesh] OR Exercise\*[tiab] OR Physical Activit\*[tiab] OR Physical Exercise\*[tiab] OR Isometric Exercise\*[tiab] OR Aerobic Exercise\*[tiab] OR Exercise Training\*[tiab] OR Sport\*[tiab] OR Movement[tiab] OR Workout\*[tiab] OR Physical Training\*[tiab] OR Energy expenditure[tiab] OR Athletic\*[tiab] OR Acute Exercise\*[tiab] OR Chronic Exercise\*[tiab] OR Exercise intervention[tiab] OR Intervention\* [tiab] OR Training\*[tiab] OR Program[tiab] OR Physical education[tiab] OR Locomotor Activit\*[tiab] OR Physical therap\*[tiab] OR motor activit\*[tiab] OR Soccer[tiab] OR Swim\*[tiab] OR Aquatic\*[tiab] OR Div\*[tiab] OR Football[tiab] OR Pin pang[tiab] OR Ping-pong[tiab] OR Ping pang[tiab] OR Basketball[tiab] OR Cricket[tiab] OR Tennis[tiab] OR Rugby[tiab] OR Danc\*[tiab] OR Martial art\*[tiab] OR Netball[tiab] OR Hockey[tiab] OR Gym\*[tiab] OR Horse rid\*[tiab] OR Horseback rid\*[tiab] OR Equestrian[tiab] OR Baseball[tiab] OR Yoga[tiab] OR Badminton[tiab] OR Taekwondo[tiab] OR Judo[tiab] OR Cycling[tiab] OR Physical fitness[tiab] OR Fitness[tiab] OR Resistance exercise[tiab] OR Bicycling[tiab] OR Boxing[tiab] OR Golf[tiab] OR Tai Ji[tiab] OR

Mountaineering[tiab] OR Racquet sports[tiab] OR Skating[tiab] OR Snow sports  
skiing[tiab] OR Wrestling[tiab] OR Weight lifting[tiab] OR Games  
recreational[tiab] OR Weight bearing exercise[tiab] OR Strength training[tiab] OR  
Running[tiab] OR Agility[tiab] OR Trampoline[tiab] OR Snowshoeing[tiab] OR  
Skating[tiab] OR Exergaming[tiab] OR Skateboarding[tiab] OR Walking[tiab] OR  
Treadmill[tiab]

#3 "Child"[Mesh] OR "Adolescent"[Mesh] OR "Young Adult"[Mesh] OR  
"Minor"[Mesh] OR Adolescenc\*[tiab] OR Teen\*[tiab] OR Teenager\*[tiab] OR  
Youth\*[tiab] OR "Minors"[tiab] OR Minor\*[tiab] OR "Child"[tiab] OR  
Child\*[tiab] OR Kid[tiab] OR Kids[tiab] OR Girl\*[tiab] OR Boy\*[tiab] OR Under  
age\*[tiab] OR Underage\*[tiab] OR Young people[tiab] OR young person[tiab] OR  
Prepubescen\*[tiab] OR Pubescen\*[tiab] OR Young Adult\*[tiab] OR School  
age[tiab] OR Preschool\*[tiab] OR Student\*[tiab]

#4 #1 AND #2 AND #3

### **Web of Science 6236**

#1 TS = ("Attention Deficit Disorder with Hyperactivit\*" OR "attention-deficit  
hyperactivity disorder\*" OR "attention deficit disorder\*" OR "ADHD" OR adhd  
OR addh OR add OR "Attention Deficit Disorder\* with Hyperactivity" OR  
"Attention Deficit Hyperactivity Disorder\*" OR "Attention Deficit-Hyperactivity  
Disorder\*" OR "attention deficit disorder hyperactivity" OR "attention deficit"  
OR "child attention deficit disorder" OR hyperactiv\* OR "Hyperkinetic  
Syndrome\*" OR "syndrome\* hyperkinetic" OR "hyperkinetic syndrome  
childhood" OR "attention deficit hyperkinetic disorder" OR "hyperkinetic  
disorder" OR hyperkinet\* OR overactive\* OR "overactive child syndrome" OR

inattenti\* OR “attention problem\*” OR “syndrome hyperkinetic” OR “hyperkinetic syndrome” OR “hyperactivity disorder” OR “hyperactive child syndrome” OR “childhood hyperkinetic syndrome”)

#2 TS = (Attention Deficit Disorder with Hyperactivity)

#3 TS = (Sport\* OR Exercis\* OR “Locomotor Activit\*” OR “Physical\* therap\*” OR “physical\* activit\*” OR “motor activit\*” OR Soccer OR Swim\* OR Aquatic\* OR Dive OR Diving OR Football OR Pin pang OR Ping-pong OR Ping pang OR Basketball OR Cricket OR Tennis OR Rugby OR Danc\* OR Athletic\* OR “Martial art\*” OR Netball OR Hockey OR Gym\* OR “horse rid\*” OR “horseback rid\*” OR Equestrian OR Baseball OR Yoga OR Badminton OR Taekwondo OR Danc\* OR Judo OR Cycling)

#4 TS = (Sports OR Exercise)

#5 TS=(Child OR Adolescent OR Young Adult OR Minor OR Adolescen\* OR Teen\* OR Teenager\* OR Youth\* OR Minors OR Minor\* OR Child\* OR Kid OR Kids OR Girl\* OR Boy\* OR Under age\* OR Underage\* OR Young people OR young person OR Prepubescen\* OR Pubescen\* OR Young Adult\* OR School age OR Preschool\* OR Student\*)

#6 TS = (Child OR Adolescent OR Young Adult OR Minor )

#7 #1 OR #2

#8 #3 OR #4

#9 #5 OR #6

#10 #7 AND #8 AND#9

## Cochrane Library 1164

- #1 (Attention Deficit Disorder with Hyperactivit\* OR attention-deficit hyperactivity disorder\* OR attention deficit disorder\* OR ADHD OR adhd OR addh OR add OR Attention Deficit Disorder\* with Hyperactivity OR Attention Deficit Hyperactivity Disorder\* OR Attention Deficit-Hyperactivity Disorder\* OR attention deficit disorder hyperactivity OR attention deficit” OR child attention deficit disorder OR hyperactiv\* OR Hyperkinetic Syndrome\* OR syndrome\* hyperkinetic OR hyperkinetic syndrome childhood OR attention deficit hyperkinetic disorder OR hyperkinetic disorder OR hyperkinet\* OR overactive\* OR “overactive child syndrome OR inattenti\* OR attention problem\* OR syndrome hyperkinetic OR hyperkinetic syndrome OR hyperactivity disorder OR hyperactive child syndrome OR childhood hyperkinetic syndrome): ti, ab, kw
- #2 Attention Deficit Disorder with Hyperactivity [Mesh]
- #3 (Sport\* OR Exercis\* OR “Locomotor Activit\*” OR “Physical\* therap\*” OR “physical\* activit\*” OR “motor activit\*” OR Soccer OR Swim\* OR Aquatic\* OR Dive OR Diving OR Football OR Pin pang OR Ping-pong OR Ping pang OR Basketball OR Cricket OR Tennis OR Rugby OR Danc\* OR Athletic\* OR “Martial art\*” OR Netball OR Hockey OR Gym\* OR “horse rid\*” OR “horseback rid\*” OR Equestrian OR Baseball OR Yoga OR Badminton OR Taekwondo OR Danc\* OR Judo OR Cycling): ti, ab, kw
- #4 Sports [Mesh]
- #5 Exercise [Mesh]
- #6 (Child OR Adolescent OR Young Adult OR Minor OR Adolescen\* OR Teen\* OR Teenager\* OR Youth\* OR Minors OR Minor\* OR Child\* OR Kid OR Kids OR Girl\* OR Boy\* OR Under age\* OR Underage\* OR Young people OR young

person OR Prepubescen\* OR Pubescen\* OR Young Adult\* OR School age OR  
Preschool\* OR Student\*): ti, ab, kw

#7 Child [Mesh] OR Adolescent [Mesh] OR Young Adult [Mesh] OR Minor [Mesh]

#8 #1 OR #2

#9 #3 OR #4 OR #5

#10 #6 OR #7

#11 #8 AND #9 AND #10

### **Embase 2653**

#1 'attention deficit disorder with hyperactivit\*' OR 'attention-deficit hyperactivity disorder\*' OR 'attention deficit disorder\*' OR 'adhd' OR adhd OR addh OR add OR 'attention deficit disorder\* with hyperactivity' OR 'attention deficit hyperactivity disorder\*' OR 'attention deficit-hyperactivity disorder\*' OR 'attention deficit disorder hyperactivity' OR 'attention deficit' OR 'child attention deficit disorder' OR hyperactiv\* OR 'hyperkinetic syndrome\*' OR 'syndrome\* hyperkinetic' OR 'hyperkinetic syndrome childhood' OR 'attention deficit hyperkinetic disorder' OR 'hyperkinetic disorder' OR hyperkinet\* OR overactive\* OR 'overactive child syndrome' OR inattenti\* OR 'attention problem\*' OR 'syndrome hyperkinetic' OR 'hyperkinetic syndrome' OR 'hyperactivity disorder' OR 'hyperactive child syndrome' OR 'childhood hyperkinetic syndrome'

#2 'attention deficit disorder'/exp

#3 sport\* OR exercis\* OR 'locomotor activit\*' OR 'physical\* therap\*' OR 'physical\* activit\*' OR 'motor activit\*' OR soccer OR swim\* OR aquatic\* OR dive OR



diving OR football OR 'pin pang' OR 'ping pong' OR 'ping pang' OR basketball  
OR cricket OR tennis OR rugby OR athletic\* OR 'martial art\*' OR netball OR  
hockey OR gym\* OR 'horse rid\*' OR 'horseback rid\*' OR equestrian OR baseball  
OR yoga OR badminton OR taekwondo OR danc\* OR judo OR cycling

#4 'sport'/exp

#5 'exercise'/exp

#6 Child OR Adolescent OR Young Adult OR Minor OR Adolescen\* OR Teen\* OR  
Teenager\* OR Youth\* OR Minors OR Minor\* OR Child\* OR Kid OR Kids OR  
Girl\* OR Boy\* OR Under age\* OR Underage\* OR Young people OR young  
person OR Prepubescen\* OR Pubescen\* OR Young Adult\* OR School age OR  
Preschool\* OR Student\*

#7 'Child'/exp

#8 'Adolescent'/exp

#9 #1 OR #2

#10 #3 OR #4 OR #5

#11 #6 OR #7 OR #8

#12 #9 AND #10 AND #11

## **SPORTDiscus 1765**

#1 DE "Attention Deficit Disorder with Hyperactivity"

#2 ("Attention Deficit Disorder with Hyperactivit\*" OR "attention-deficit  
hyperactivity disorder\*" OR "attention deficit disorder\*" OR "ADHD" OR adhd  
OR addh OR add OR "Attention Deficit Disorder\* with Hyperactivity" OR

“Attention Deficit Hyperactivity Disorder\*” OR “Attention Deficit-Hyperactivity Disorder\*” OR “attention deficit disorder hyperactivity” OR “attention deficit” OR “child attention deficit disorder” OR hyperactiv\* OR “Hyperkinetic Syndrome\*” OR “syndrome\* hyperkinetic” OR “hyperkinetic syndrome childhood” OR “attention deficit hyperkinetic disorder” OR “hyperkinetic disorder” OR hyperkinet\* OR overactive\* OR “overactive child syndrome” OR inattenti\* OR “attention problem\*” OR “syndrome hyperkinetic” OR “hyperkinetic syndrome” OR “hyperactivity disorder” OR “hyperactive child syndrome” OR “childhood hyperkinetic syndrome”). TX

#3 DE “Sports”

#4 DE “Exercise”

#5 (Sport\* OR Exercis\* OR “Locomotor Activit\*” OR “Physical\* therap\*” OR “physical\* activit\*” OR “motor activit\*” OR Soccer OR Swim\* OR Aquatic\* OR Dive OR Diving OR Football OR Pin pang OR Ping-pong OR Ping pang OR Basketball OR Cricket OR Tennis OR Rugby OR Danc\* OR Athletic\* OR “Martial art\*” OR Netball OR Hockey OR Gym\* OR “horse rid\*” OR “horseback rid\*” OR Equestrian OR Baseball OR Yoga OR Badminton OR Taekwondo OR Danc\* OR Judo OR Cycling). TX

#6 DE “Child”

#7 DE “Adolescent”

#8 (Child OR Adolescent OR Young Adult OR Minor OR Adolescen\* OR Teen\* OR Teenager\* OR Youth\* OR Minors OR Minor\* OR Child\* OR Kid OR Kids OR Girl\* OR Boy\* OR Under age\* OR Underage\* OR Young people OR young person OR Prepubescen\* OR Pubescen\* OR Young Adult\* OR School age OR Preschool\* OR Student\*). TX

#9 #1 OR #2

#10 #3 OR #4 OR #5

#11 #6 OR #7 OR #8

#12 #9 AND #10 AND #11

## **PsycINFO 3042**

#1 "Attention Deficit Disorder with Hyperactivity" OR Attention Deficit Disorders with Hyperactivity OR Attention Deficit Hyperactivity Disorder\* OR Hyperkinetic Syndrome\* OR ADDH OR ADHD OR Attention Deficit Disorder\* OR ADD OR Hyperactivit\* OR Inattenti\* OR Impulsivit\* OR attention-deficit hyperactivity disorder\* OR Attention Deficit-Hyperactivity Disorder\* OR Hyperkinet\* OR Overactive\*

#2 Exercise OR Sports OR Exercise\* OR Physical Activit\* OR Physical Exercise\* OR Isometric Exercise\* OR Aerobic Exercise\* OR Exercise Training\* OR Sport\* OR Movement OR Workout\* OR Physical Training\* OR Energy expenditure OR Athletic\* OR Acute Exercise\* OR Chronic Exercise\* OR Exercise intervention OR Intervention\* OR Training\* OR Program OR Physical education OR Locomotor Activit\* OR Physical therap\* OR motor activit\* OR Soccer OR Swim\* OR Aquatic\* OR Div\* OR Football OR Pin pang OR Ping-pong OR Ping pang OR Basketball OR Cricket OR Tennis OR Rugby OR Danc\* OR Martial art\* OR Netball OR Hockey OR Gym\* OR Horse rid\* OR Horseback rid\* OR Equestrian OR Baseball OR Yoga OR Badminton OR Taekwondo OR Judo OR Cycling Physical fitness OR Fitness OR Resistance exercise OR Bicycling OR Boxing OR Golf OR Tai Ji OR Mountaineering OR Racquet sports OR Skating OR Snow sports skiing OR Wrestling OR Weight lifting OR Games recreational

OR Weight bearing exercise OR Strength training OR Running OR Agility OR Trampoline OR Snowshoeing OR Skating OR Exergaming OR Skateboarding OR Walking OR Treadmill

#3 Child OR Adolescent OR "Young Adult" OR Minor OR Adolescen\* OR Teen\* OR Teenager\* OR Youth\* OR "Minors" OR Minor\* OR "Child" OR Child\* OR Kid OR Kids OR Girl\* OR Boy\* OR Under age\* OR Underage\* OR Young people OR young person OR Prepubescen\* OR Pubescen\* OR Young Adult\* OR School age OR Preschool\* OR Student\*

#4 #1 AND #2 AND #3

S3. The inter-rater agreement for selecting studies

Table S2 The inter-rater agreement for reading the title and abstract

| Reviewer 1 | Reviewer 2 |         |         | Total |
|------------|------------|---------|---------|-------|
|            | Exclude    | Include | Unclear |       |
| Exclude    | 13514      | 8       | 11      | 13533 |
| Include    | 9          | 78      | 8       | 95    |
| Unclear    | 14         | 6       | 10      | 30    |
| Total      | 13537      | 92      | 29      | 13658 |

Kappa score: 0.77 (0.72-0.83)

Table S3 The inter-rater agreement for full-text review

| Reviewer 1 | Reviewer 2 |         |         | Total |
|------------|------------|---------|---------|-------|
|            | Exclude    | Include | Unclear |       |
| Exclude    | 67         | 1       | 3       | 71    |
| Include    | 1          | 54      | 0       | 55    |
| Unclear    | 2          | 2       | 0       | 4     |
| Total      | 70         | 57      | 3       | 130   |

Kappa score: 0.87 (0.79-0.95)

## S4. Study quality assessment

Table S4 Quality assessment for RCTs and quasi-RCTs

| Reference                    | Item 1 | Item 2 | Item 3 | Item 4 | Item 5 | Item 6 | Item 7 | Item 8 | Item 9 | Item 10 | Item 11 | Score |
|------------------------------|--------|--------|--------|--------|--------|--------|--------|--------|--------|---------|---------|-------|
| Messler et al. (2018)        | 1      | 1      | 0      | 1      | 0      | 0      | 0      | 1      | 1      | 1       | 1       | 6/10  |
| Benzing et al. (2019)        | 1      | 1      | 0      | 1      | 0      | 0      | 0      | 1      | 1      | 1       | 1       | 6/10  |
| Bustamante et al. (2016)     | 1      | 1      | 0      | 1      | 0      | 0      | 0      | 1      | 1      | 1       | 1       | 6/10  |
| Chang et al. (2014)          | 1      | 0      | 0      | 1      | 0      | 0      | 0      | 1      | 1      | 1       | 1       | 5/10  |
| Choi et al. (2015)           | 1      | 1      | 0      | 1      | 0      | 0      | 0      | 1      | 1      | 1       | 1       | 6/10  |
| Chou et al. (2017)           | 1      | 0      | 0      | 1      | 0      | 0      | 0      | 1      | 1      | 1       | 1       | 5/10  |
| Faramarzi et al. (2016)      | 1      | 1      | 0      | 1      | 0      | 0      | 0      | 1      | 1      | 1       | 1       | 6/10  |
| Gelade et al. (2017)         | 1      | 1      | 0      | 1      | 1      | 0      | 1      | 1      | 1      | 1       | 1       | 8/10  |
| Kadri et al. (2019)          | 1      | 1      | 0      | 1      | 0      | 0      | 0      | 1      | 1      | 1       | 1       | 6/10  |
| Lee et al. (2017)            | 1      | 1      | 0      | 1      | 0      | 0      | 0      | 1      | 1      | 1       | 1       | 6/10  |
| Memarmoghaddam et al. (2016) | 1      | 1      | 0      | 1      | 0      | 0      | 0      | 1      | 1      | 1       | 1       | 6/10  |
| Pan et al. (2016)            | 1      | 1      | 0      | 1      | 0      | 0      | 0      | 1      | 1      | 1       | 1       | 6/10  |
| Pan et al. (2019)            | 1      | 0      | 0      | 1      | 0      | 0      | 0      | 1      | 1      | 1       | 1       | 5/10  |
| Rezaei et al. (2018)         | 1      | 1      | 0      | 1      | 0      | 0      | 0      | 1      | 1      | 1       | 1       | 6/10  |
| Silva et al. (2020)          | 1      | 1      | 0      | 1      | 0      | 0      | 0      | 0      | 1      | 1       | 1       | 5/10  |
| Smith et al. (2020)          | 1      | 1      | 0      | 1      | 0      | 0      | 0      | 1      | 1      | 1       | 1       | 6/10  |
| Verret et al. (2012)         | 1      | 0      | 0      | 1      | 0      | 0      | 0      | 1      | 1      | 1       | 1       | 5/10  |
| Ziereis et al. (2015)        | 1      | 1      | 0      | 1      | 0      | 0      | 0      | 1      | 1      | 1       | 1       | 6/10  |
| Benzing et al. (2018)        | 1      | 1      | 0      | 1      | 1      | 0      | 0      | 1      | 1      | 1       | 1       | 7/10  |
| Chang et al. (2012)          | 1      | 1      | 0      | 1      | 0      | 0      | 0      | 1      | 1      | 1       | 1       | 6/10  |

| Reference                  | Item 1 | Item 2 | Item 3 | Item 4 | Item 5 | Item 6 | Item 7 | Item 8 | Item 9 | Item 10 | Item 11 | Score |
|----------------------------|--------|--------|--------|--------|--------|--------|--------|--------|--------|---------|---------|-------|
| Gawrilow et al. (2013)     | 1      | 1      | 0      | 1      | 0      | 0      | 0      | 1      | 1      | 1       | 1       | 6/10  |
| Kang et al. (2011)         | 1      | 1      | 0      | 1      | 0      | 0      | 0      | 1      | 1      | 1       | 1       | 6/10  |
| Chang et al. (2022)        | 1      | 1      | 0      | 1      | 0      | 0      | 0      | 1      | 1      | 1       | 1       | 6/10  |
| Smith et al. (2019)        | 1      | 1      | 0      | 1      | 0      | 0      | 0      | 1      | 1      | 1       | 1       | 6/10  |
| Ahmed et al. (2011)        | 1      | 1      | 0      | 1      | 0      | 0      | 0      | 1      | 1      | 1       | 1       | 6/10  |
| Hattabi et al. (2019)      | 1      | 1      | 0      | 1      | 0      | 0      | 0      | 1      | 1      | 1       | 1       | 6/10  |
| Hoza et al. (2014)         | 1      | 1      | 0      | 1      | 1      | 0      | 0      | 1      | 1      | 1       | 1       | 7/10  |
| Jensen et al. (2004)       | 1      | 1      | 0      | 1      | 0      | 0      | 0      | 1      | 1      | 1       | 1       | 6/10  |
| Garcia-Gomez et al. (2016) | 1      | 0      | 0      | 1      | 0      | 0      | 0      | 1      | 1      | 1       | 1       | 5/10  |
| Porter et al. (1984)       | 1      | 1      | 0      | 1      | 0      | 0      | 0      | 0      | 1      | 1       | 1       | 5/10  |
| Oh et al. (2018)           | 1      | 1      | 0      | 1      | 0      | 0      | 0      | 1      | 1      | 1       | 1       | 6/10  |
| Liu et al. (2018)          | 1      | 1      | 0      | 1      | 0      | 0      | 0      | 1      | 1      | 1       | 1       | 6/10  |
| Bahram et al. (2014)       | 1      | 1      | 0      | 1      | 0      | 0      | 0      | 1      | 1      | 1       | 1       | 6/10  |
| Hattabi et al. (2021)      | 1      | 0      | 0      | 0      | 0      | 0      | 0      | 1      | 1      | 1       | 1       | 4/10  |
| Felmet et al. (1998)       | 1      | 1      | 0      | 1      | 0      | 0      | 0      | 1      | 1      | 1       | 1       | 5/10  |
| Gelade et al. (2018)       | 1      | 1      | 1      | 1      | 0      | 0      | 0      | 1      | 1      | 1       | 1       | 7/10  |
| Soori et al. (2020)        | 1      | 1      | 0      | 1      | 0      | 0      | 0      | 1      | 1      | 1       | 1       | 6/10  |
| Song et al. (2022)         | 1      | 1      | 0      | 1      | 0      | 0      | 0      | 1      | 1      | 1       | 1       | 6/10  |
| Chen et al. (2022)         | 1      | 1      | 0      | 1      | 0      | 0      | 0      | 1      | 1      | 1       | 1       | 6/10  |
| Xu et al. (2021)           | 1      | 1      | 0      | 1      | 0      | 0      | 0      | 1      | 1      | 1       | 1       | 6/10  |
| Chuang et al. (2015)       | 1      | 1      | 0      | 1      | 0      | 0      | 0      | 1      | 1      | 1       | 1       | 6/10  |
| Ludyga et al. (2020)       | 1      | 1      | 0      | 1      | 0      | 0      | 0      | 1      | 1      | 1       | 1       | 6/10  |

| Reference           | Item 1 | Item 2 | Item 3 | Item 4 | Item 5 | Item 6 | Item 7 | Item 8 | Item 9 | Item 10 | Item 11 | Score |
|---------------------|--------|--------|--------|--------|--------|--------|--------|--------|--------|---------|---------|-------|
| Silva et al. (2015) | 1      | 0      | 0      | 1      | 0      | 0      | 0      | 1      | 1      | 1       | 1       | 5/10  |
| Liang et al. (2022) | 1      | 1      | 0      | 1      | 0      | 0      | 0      | 1      | 1      | 1       | 1       | 6/10  |

Item 1, eligibility criteria; Item 2, random allocation; Item 3, concealed allocation; Item 4, baseline comparability; Item 5, blind subjects; Item 6, blind therapists; Item 7, blind assessors; Item 8, adequate follow-up; Item 9, intention-to-treat analysis; Item 10, between-group comparisons; Item 11, estimates and variability.



Table S5 Quality assessment for self-control trials

| Reference                     | Item 1 | Item 2  | Item 3 | Item 4 | Item 5 | Item 6 | Item 7 | Item 8  | Item 9  |
|-------------------------------|--------|---------|--------|--------|--------|--------|--------|---------|---------|
| So et al. (2017)              | Yes    | Unclear | Yes    | Yes    | Yes    | Yes    | Yes    | Yes     | Yes     |
| Hernandez-Reif et al. (2001)  | Yes    | NA      | NA     | No     | Yes    | Yes    | Yes    | Yes     | Unclear |
| Lufi et al. (2011)            | Yes    | Yes     | Yes    | Yes    | Yes    | Yes    | Yes    | Yes     | Yes     |
| Cuypers et al. (2011)         | Yes    | NA      | NA     | No     | Yes    | Yes    | Yes    | Yes     | Yes     |
| Jang et al. (2015)            | Yes    | NA      | NA     | No     | Yes    | Yes    | Yes    | Yes     | Yes     |
| Schoenfelder et al. (2017)    | Yes    | NA      | NA     | No     | Yes    | Yes    | Yes    | Yes     | Yes     |
| Siu et al. (2020)             | Yes    | NA      | NA     | No     | Yes    | Yes    | Yes    | Yes     | Yes     |
| Shema-Shiratzky et al. (2019) | Yes    | NA      | NA     | No     | Yes    | Yes    | Yes    | Yes     | Yes     |
| Smith et al. (2013)           | Yes    | NA      | NA     | No     | Yes    | Yes    | Yes    | Yes     | Yes     |
| Pontifex et al. (2013)        | Yes    | No      | NA     | Yes    | Yes    | Yes    | Yes    | Yes     | Yes     |
| Piepmeyer et al. (2015)       | Yes    | Yes     | NA     | Yes    | Yes    | Yes    | Yes    | Yes     | Yes     |
| Hung et al. (2016)            | Yes    | No      | NA     | Yes    | Yes    | Yes    | Yes    | Yes     | Yes     |
| Ludyga et al. (2017)          | Yes    | NA      | NA     | Yes    | Yes    | Yes    | Yes    | Yes     | Yes     |
| Craft et al. (1983)           | Yes    | NA      | NA     | No     | No     | Yes    | Yes    | Unclear | Unclear |
| McKune et al. (2003)          | Yes    | Unclear | Yes    | Yes    | No     | Yes    | Yes    | Yes     | Yes     |

Item 1, Were the causal relationships in the study clearly stated?

Item 2, Were the baselines comparable between groups?

Item 3, Were the groups receiving the same intervention besides to be validated?

Item 4, Was a control group set up?

Item 5, Were the outcome measures diversified before and after the intervention?

Item 6, Was follow-up complete and, if not, was loss to follow-up reported and addressed?

Item 7, Were the outcome measures used in the same way in each group?

Item 8, Were the outcomes measured in a valid and reliable way?

Item 9, Was appropriate statistical analysis used?

## S5. Summary table of pairwise comparison results

Table S6 Direct comparison treatment effect with control group

| Outcomes                      | Types                            | Trials | Participants | Effect size          | $I^2$ |
|-------------------------------|----------------------------------|--------|--------------|----------------------|-------|
| Executive functions           | Open-skill activities            | 4      | 110          | 1.94 [1.11, 2.77]    | 66.0  |
|                               | Closed-skill activities          | 13     | 400          | 1.09 [0.63, 1.55]    | 77.0  |
|                               | Multicomponent PA                | 10     | 355          | 0.74 [0.32, 1.17]    | 62.0  |
|                               | Exergaming                       | 3      | 129          | 0.56 [0.21, 0.92]    | 0     |
| Hyperactivity/<br>impulsivity | Closed-skill activities          | 7      | 288          | -1.84 [-2.67, -1.02] | 81.0  |
|                               | Multicomponent PA                | 2      | 115          | 0.16 [-0.21, 0.52]   | 0     |
|                               | High-intensity interval training | 1      | 43           | -0.43 [-1.05, 0.19]  | NA    |
|                               | Exergaming                       | 1      | 51           | -0.28 [-0.83, 0.28]  | NA    |
|                               | Open-skill activities            | 1      | 14           | -0.25 [-1.35, 0.85]  | NA    |
| Inattention                   | Closed-skill activities          | 5      | 184          | -1.57 [-2.58, -0.57] | 80.0  |
|                               | High-intensity interval training | 1      | 43           | -0.43 [-1.05, 0.19]  | NA    |
|                               | Exergaming                       | 1      | 51           | -0.02 [-0.57, 0.53]  | NA    |
|                               | Multicomponent PA                | 3      | 209          | 0.03 [-0.24, 0.30]   | 0     |
|                               | Open-skill activities            | 1      | 14           | -0.24 [-1.33, 0.86]  | NA    |

## S6. Analysis for executive functions

Figure S1 Loop-specific heterogeneity for executive functions

| Loop  | IF    | seIF  | z_value | p_value | CI_95         | Loop_Heterog_tau2 |
|-------|-------|-------|---------|---------|---------------|-------------------|
| A-D-E | 0.580 | 6.340 | 0.092   | 0.927   | (0.00, 13.01) | 2.223             |
| A-B-E | 0.344 | 1.158 | 0.297   | 0.766   | (0.00, 2.61)  | 0.637             |
| A-B-C | 0.145 | 1.142 | 0.127   | 0.899   | (0.00, 2.38)  | 0.609             |

Inconsistency plot for the executive network, assuming loop-specific heterogeneity estimates.

Figure S2 The ranking of effects for executive functions

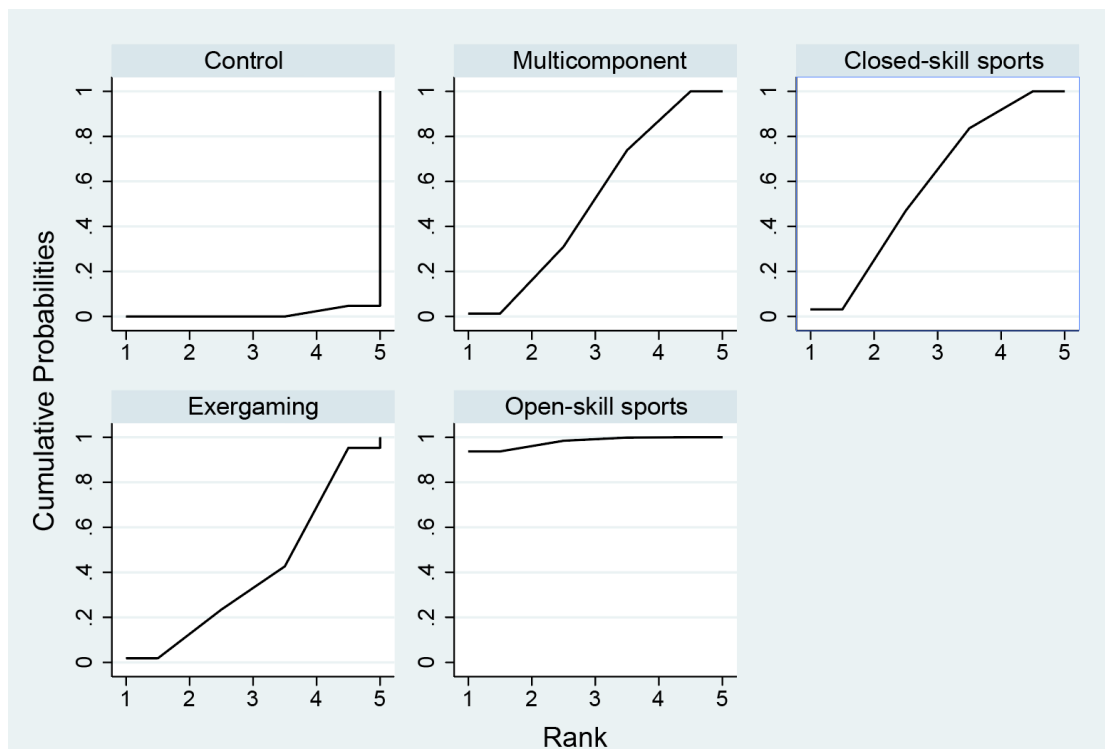

Plots of the surface under the cumulative ranking curves (SUCRA) for all comparisons in the executive functions network.

### S7. Subgroup analysis for executive functions

Figure S3 Network of eligible comparisons for inhibitory control

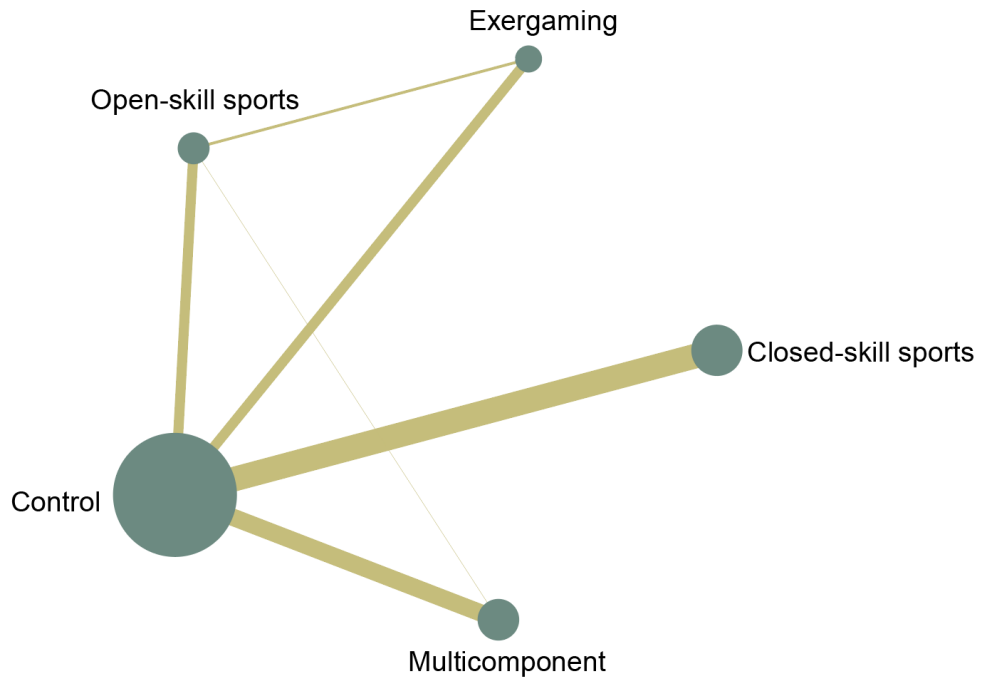

Figure S4 The ranking of effects for inhibitory control

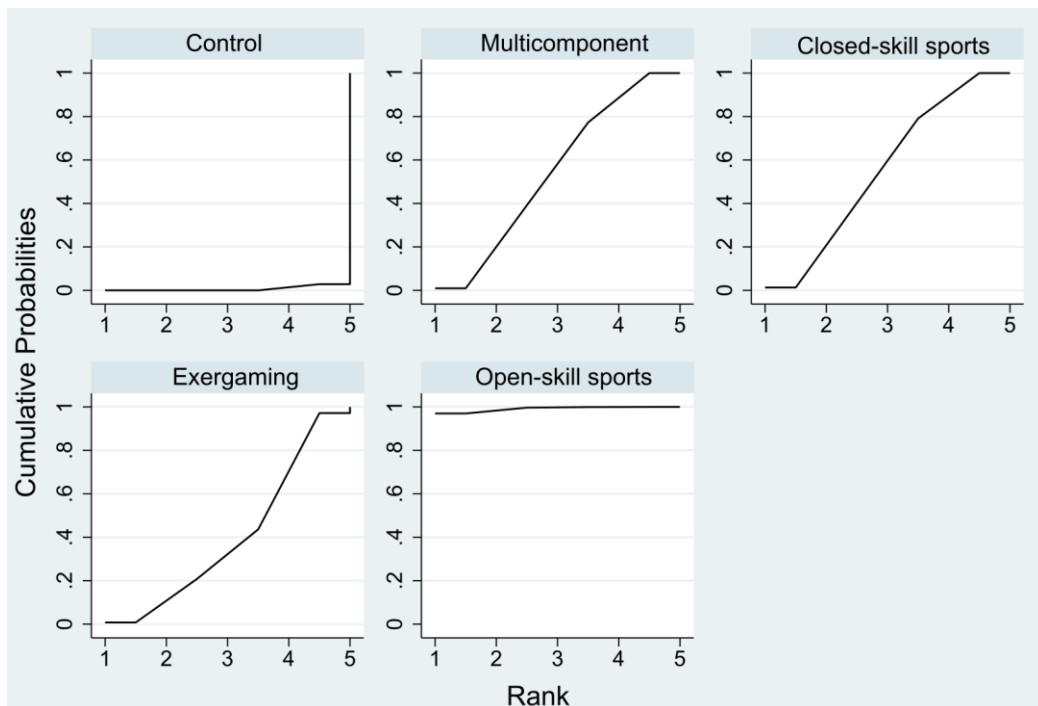

Plots of the surface under the cumulative ranking curves (SUCRA) for all comparisons in the inhibitory control.

Figure S5 Relative effect sizes of treatments efficacy based on network meta-analysis for inhibitory control

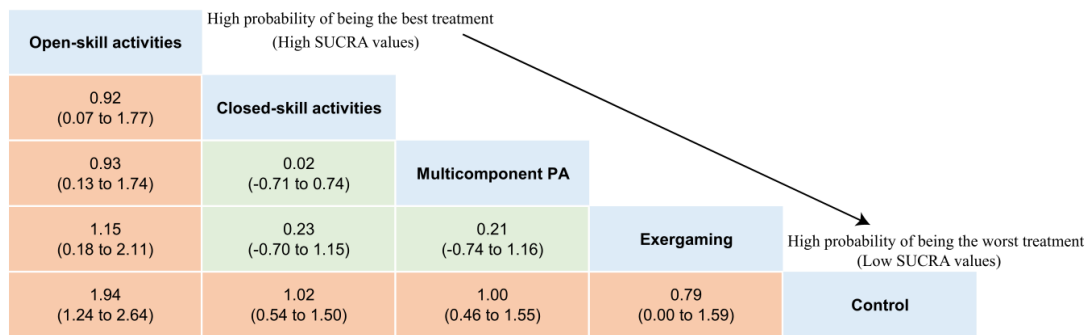

Figure S6 Loop-specific heterogeneity for inhibitory control

| Loop  | IF    | seIF  | z_value | p_value | CI_95         | Loop_Heterog_tau2 |
|-------|-------|-------|---------|---------|---------------|-------------------|
| A-D-E | 0.580 | 6.340 | 0.092   | 0.927   | (0.00, 13.01) | 2.223             |
| A-B-E | 0.398 | 1.013 | 0.393   | 0.694   | (0.00, 2.38)  | 0.512             |

Figure S7 Network of eligible comparisons for working memory

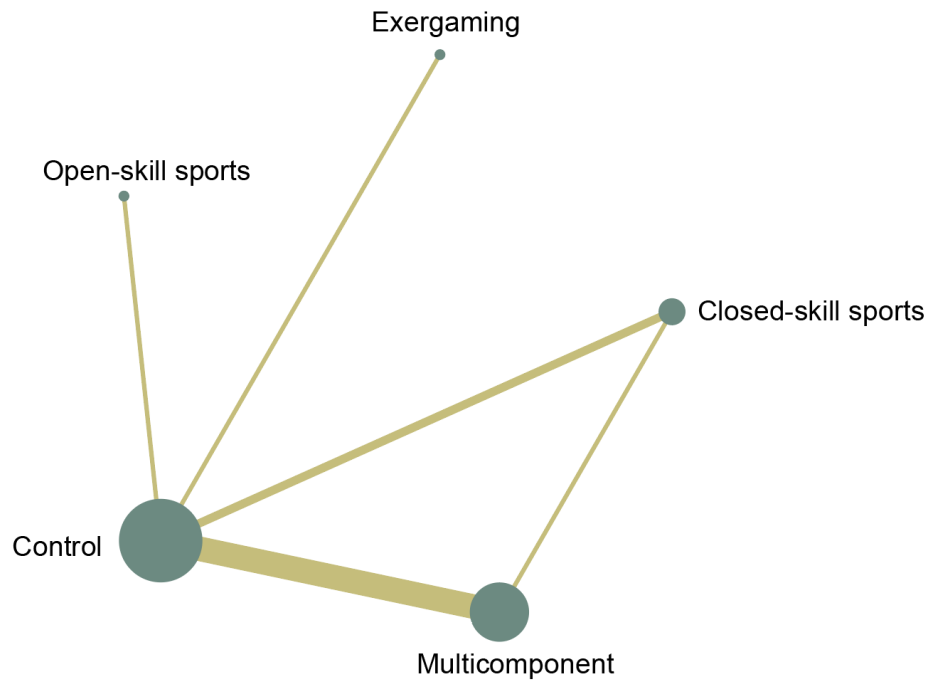

Figure S8 The ranking of effects for working memory

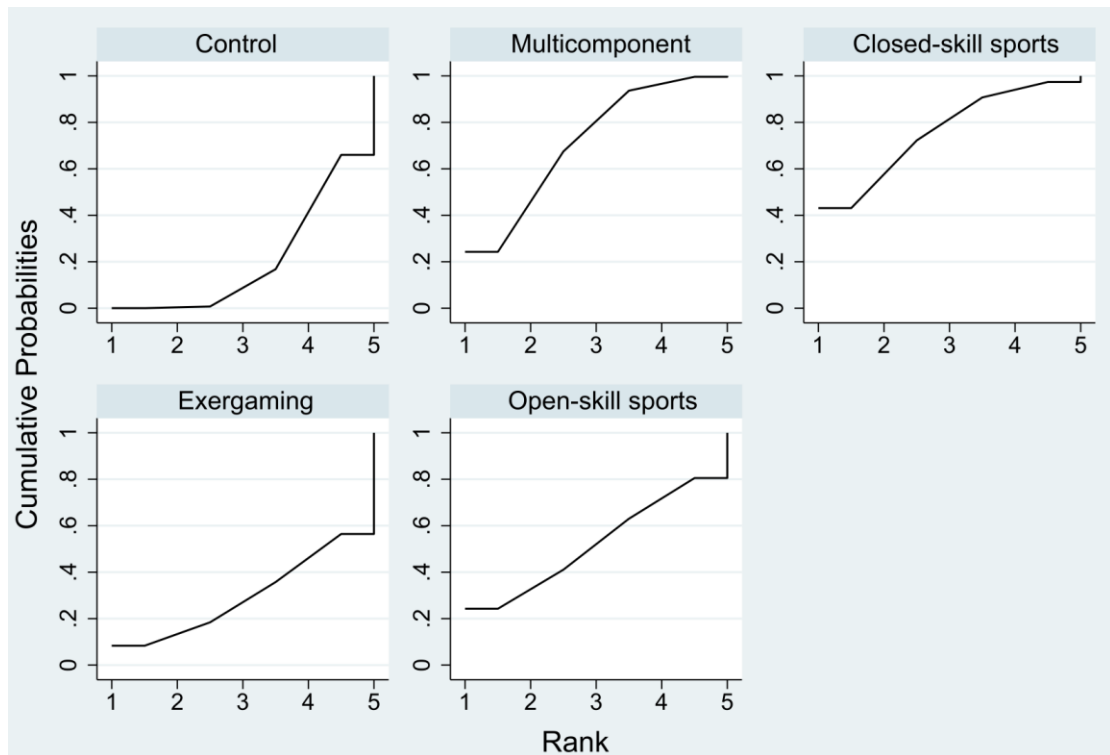

Plots of the surface under the cumulative ranking curves (SUCRA) for all comparisons in the working memory.

Figure S9 Relative effect sizes of treatments efficacy based on network meta-analysis for working memory

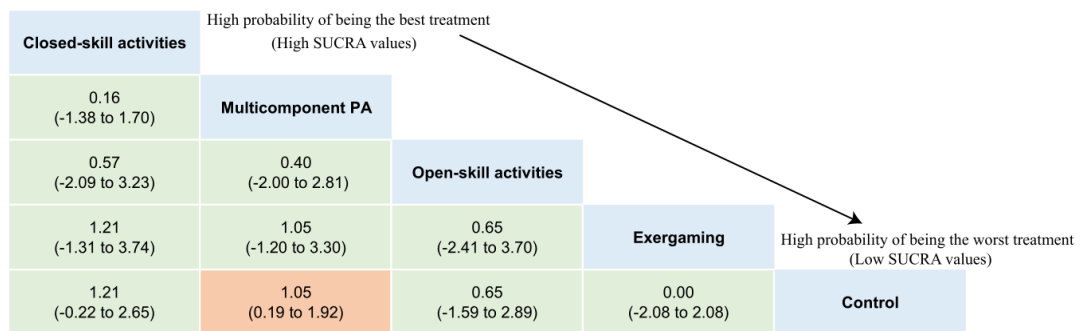

Figure S10 Loop-specific heterogeneity for working memory

| Loop  | IF    | seIF  | z_value | p_value | CI_95        | Loop_Heterog_tau2 |
|-------|-------|-------|---------|---------|--------------|-------------------|
| A-B-C | 0.129 | 1.579 | 0.082   | 0.935   | (0.00, 3.22) | 0.954             |

Figure S11 Network of eligible comparisons for cognitive flexibility

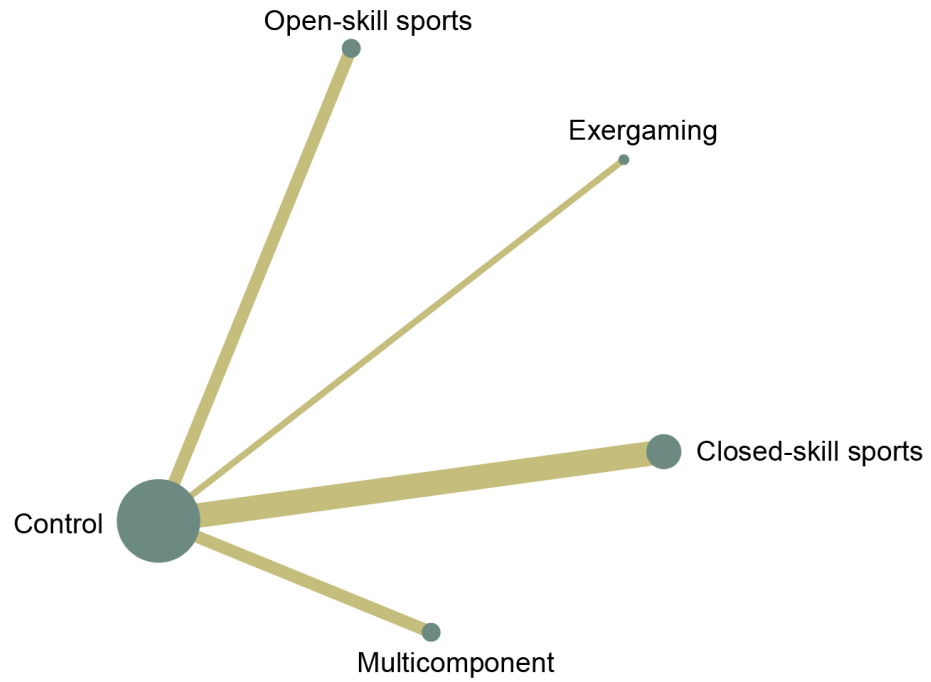

Figure S12 The ranking of effects for cognitive flexibility

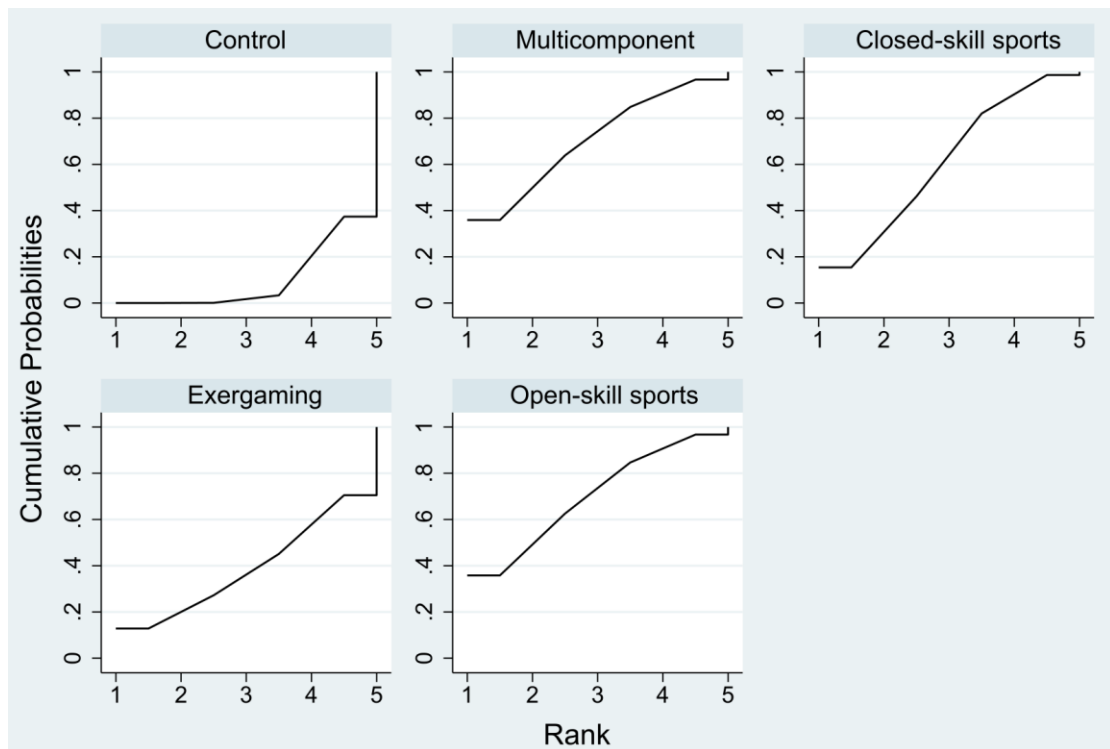



Plots of the surface under the cumulative ranking curves (SUCRA) for all comparisons in the cognitive flexibility.

Figure S13 Relative effect sizes of treatments efficacy based on network meta-analysis for cognitive flexibility

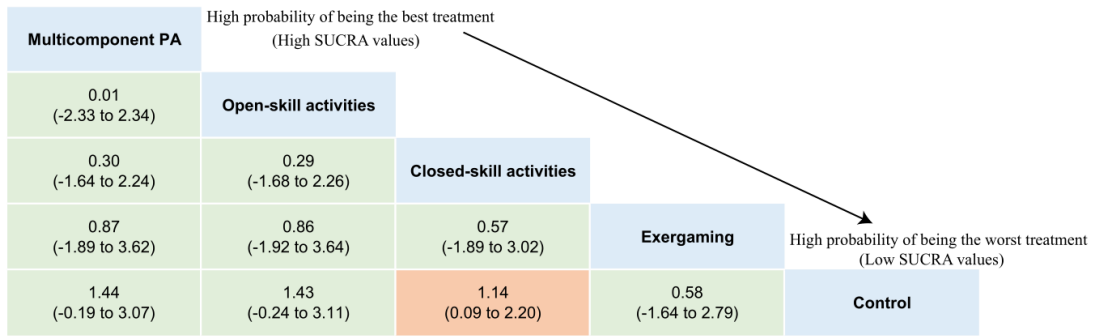

S8. Publication bias assessed with funnel plots for executive functions

Figure S14 Comparison-adjusted funnel plot for the inhibitory control network

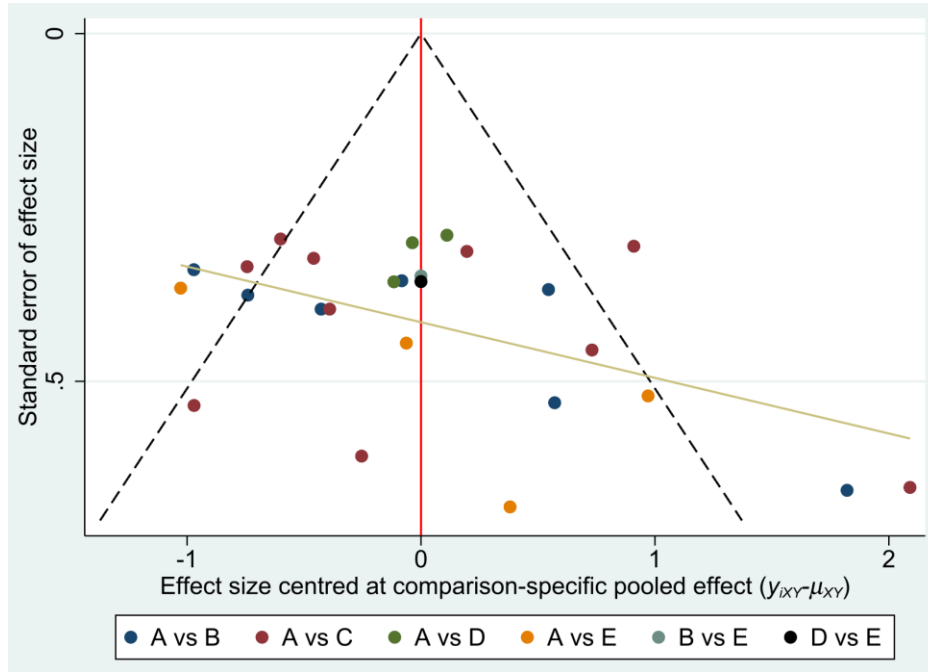

Figure S15 Comparison-adjusted funnel plot for the working memory network

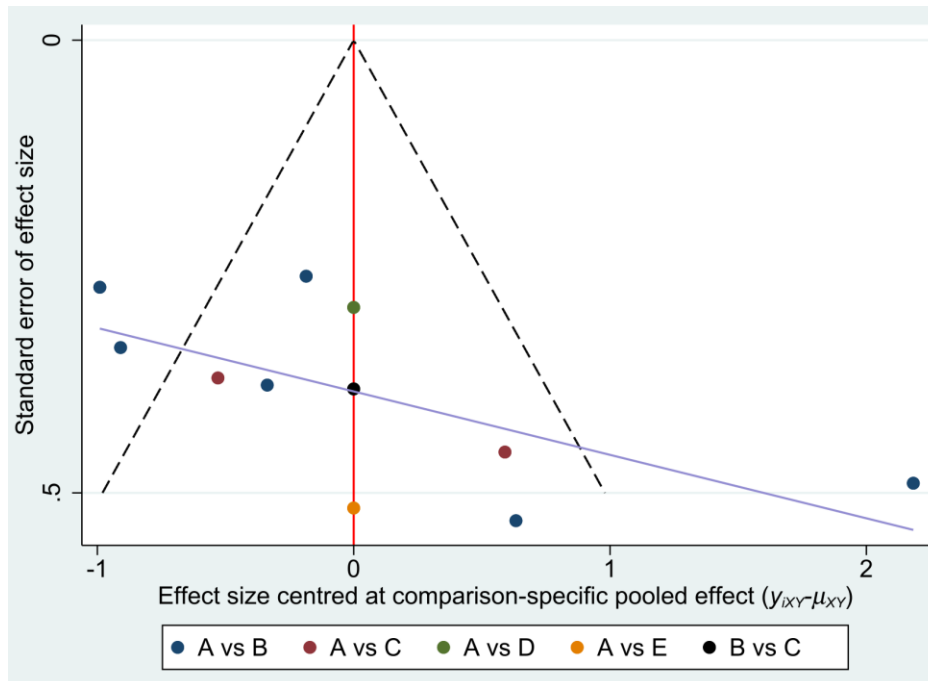

Figure S16 Comparison-adjusted funnel plot for the cognitive flexibility network

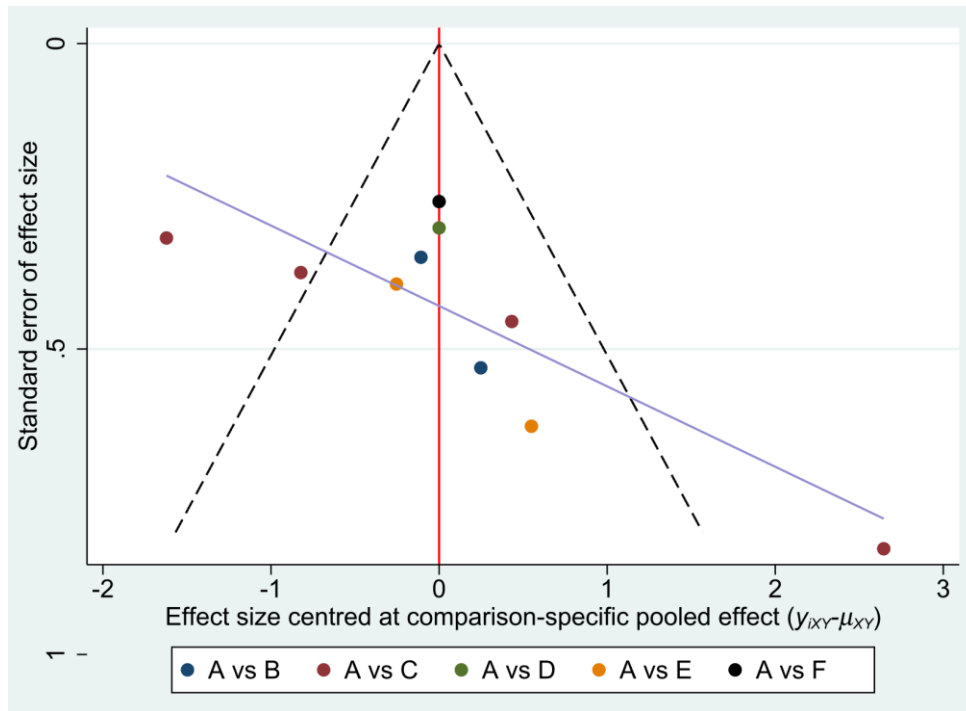

## S9. Meta-regression analyses for executive functions

Figure S17 The results of meta-regression analyses for executive functions

| <p>1. Empirical mean and standard deviation for each variable, plus standard error of the mean:</p> <table border="0"> <thead> <tr> <th></th> <th>Mean</th> <th>SD</th> <th>Naive SE</th> <th>Time-series SE</th> </tr> </thead> <tbody> <tr><td>d.1.2</td><td>-5.486</td><td>33.26</td><td>0.07438</td><td>0.05904</td></tr> <tr><td>d.1.3</td><td>-7.474</td><td>45.89</td><td>0.10261</td><td>0.07430</td></tr> <tr><td>d.1.4</td><td>53.634</td><td>46.24</td><td>0.10339</td><td>0.21210</td></tr> <tr><td>d.1.5</td><td>9.466</td><td>36.17</td><td>0.08089</td><td>0.24116</td></tr> <tr><td>sd.d</td><td>72.784</td><td>14.20</td><td>0.03175</td><td>0.07296</td></tr> <tr><td>beta[2]</td><td>61.152</td><td>147.28</td><td>0.32932</td><td>2.68689</td></tr> <tr><td>beta[3]</td><td>-52.624</td><td>173.51</td><td>0.38797</td><td>2.48008</td></tr> <tr><td>beta[4]</td><td>-46.523</td><td>90.23</td><td>0.20175</td><td>1.67674</td></tr> <tr><td>beta[5]</td><td>22.289</td><td>40.41</td><td>0.09036</td><td>4.79158</td></tr> </tbody> </table> <p>2. Quantiles for each variable:</p> <table border="0"> <thead> <tr> <th></th> <th>2.5%</th> <th>25%</th> <th>50%</th> <th>75%</th> <th>97.5%</th> </tr> </thead> <tbody> <tr><td>d.1.2</td><td>-65.21</td><td>-30.814</td><td>-7.270</td><td>20.44</td><td>56.64</td></tr> <tr><td>d.1.3</td><td>-98.84</td><td>-40.537</td><td>-2.725</td><td>29.49</td><td>65.69</td></tr> <tr><td>d.1.4</td><td>-37.48</td><td>23.302</td><td>53.691</td><td>83.77</td><td>145.33</td></tr> <tr><td>d.1.5</td><td>-61.68</td><td>-14.519</td><td>9.587</td><td>33.49</td><td>80.22</td></tr> <tr><td>sd.d</td><td>49.76</td><td>62.281</td><td>70.982</td><td>81.75</td><td>104.89</td></tr> <tr><td>beta[2]</td><td>-177.90</td><td>-45.205</td><td>95.149</td><td>197.73</td><td>219.81</td></tr> <tr><td>beta[3]</td><td>-303.22</td><td>-188.890</td><td>-29.329</td><td>95.77</td><td>153.45</td></tr> <tr><td>beta[4]</td><td>-236.99</td><td>-101.322</td><td>-42.237</td><td>11.40</td><td>124.19</td></tr> <tr><td>beta[5]</td><td>-58.43</td><td>-3.595</td><td>21.564</td><td>48.67</td><td>105.27</td></tr> </tbody> </table> <p>-- Model fit (residual deviance):</p> <table border="0"> <thead> <tr> <th>Dbar</th> <th>pD</th> <th>DIC</th> </tr> </thead> <tbody> <tr> <td>59.68413</td> <td>59.57809</td> <td>119.26222</td> </tr> </tbody> </table> <p>60 data points, ratio 0.9947, I<sup>2</sup> = 1%</p> |          | Mean      | SD       | Naive SE       | Time-series SE | d.1.2 | -5.486 | 33.26 | 0.07438 | 0.05904 | d.1.3 | -7.474 | 45.89 | 0.10261 | 0.07430 | d.1.4 | 53.634 | 46.24 | 0.10339 | 0.21210 | d.1.5 | 9.466 | 36.17 | 0.08089 | 0.24116 | sd.d | 72.784 | 14.20 | 0.03175 | 0.07296 | beta[2] | 61.152 | 147.28 | 0.32932 | 2.68689 | beta[3] | -52.624 | 173.51 | 0.38797 | 2.48008 | beta[4] | -46.523 | 90.23 | 0.20175 | 1.67674 | beta[5] | 22.289 | 40.41 | 0.09036 | 4.79158 |  | 2.5% | 25% | 50% | 75% | 97.5% | d.1.2 | -65.21 | -30.814 | -7.270 | 20.44 | 56.64 | d.1.3 | -98.84 | -40.537 | -2.725 | 29.49 | 65.69 | d.1.4 | -37.48 | 23.302 | 53.691 | 83.77 | 145.33 | d.1.5 | -61.68 | -14.519 | 9.587 | 33.49 | 80.22 | sd.d | 49.76 | 62.281 | 70.982 | 81.75 | 104.89 | beta[2] | -177.90 | -45.205 | 95.149 | 197.73 | 219.81 | beta[3] | -303.22 | -188.890 | -29.329 | 95.77 | 153.45 | beta[4] | -236.99 | -101.322 | -42.237 | 11.40 | 124.19 | beta[5] | -58.43 | -3.595 | 21.564 | 48.67 | 105.27 | Dbar | pD | DIC | 59.68413 | 59.57809 | 119.26222 | <p>1. Empirical mean and standard deviation for each variable, plus standard error of the mean:</p> <table border="0"> <thead> <tr> <th></th> <th>Mean</th> <th>SD</th> <th>Naive SE</th> <th>Time-series SE</th> </tr> </thead> <tbody> <tr><td>d.1.2</td><td>3.195</td><td>31.97</td><td>0.07149</td><td>0.11707</td></tr> <tr><td>d.1.3</td><td>10.426</td><td>29.27</td><td>0.06545</td><td>0.06062</td></tr> <tr><td>d.1.4</td><td>63.410</td><td>62.45</td><td>0.13965</td><td>0.83461</td></tr> <tr><td>d.1.5</td><td>15.209</td><td>55.19</td><td>0.12341</td><td>2.51334</td></tr> <tr><td>sd.d</td><td>92.756</td><td>28.64</td><td>0.06404</td><td>0.33395</td></tr> <tr><td>beta[2]</td><td>-134.064</td><td>267.77</td><td>0.59875</td><td>1.93663</td></tr> <tr><td>beta[3]</td><td>75.541</td><td>196.18</td><td>0.43866</td><td>10.31818</td></tr> <tr><td>beta[4]</td><td>53.412</td><td>111.77</td><td>0.24992</td><td>5.12928</td></tr> <tr><td>beta[5]</td><td>3.580</td><td>97.12</td><td>0.21717</td><td>27.90645</td></tr> </tbody> </table> <p>2. Quantiles for each variable:</p> <table border="0"> <thead> <tr> <th></th> <th>2.5%</th> <th>25%</th> <th>50%</th> <th>75%</th> <th>97.5%</th> </tr> </thead> <tbody> <tr><td>d.1.2</td><td>-61.63</td><td>-15.889</td><td>3.581</td><td>21.574</td><td>69.81</td></tr> <tr><td>d.1.3</td><td>-48.36</td><td>-6.985</td><td>10.090</td><td>27.180</td><td>72.30</td></tr> <tr><td>d.1.4</td><td>-62.75</td><td>24.472</td><td>63.320</td><td>102.297</td><td>190.20</td></tr> <tr><td>d.1.5</td><td>-96.90</td><td>-17.612</td><td>15.501</td><td>47.220</td><td>130.31</td></tr> <tr><td>sd.d</td><td>33.73</td><td>76.440</td><td>107.970</td><td>114.201</td><td>116.78</td></tr> <tr><td>beta[2]</td><td>-411.45</td><td>-335.930</td><td>-211.048</td><td>-6.783</td><td>304.15</td></tr> <tr><td>beta[3]</td><td>-246.20</td><td>-32.453</td><td>100.148</td><td>174.012</td><td>373.85</td></tr> <tr><td>beta[4]</td><td>-162.82</td><td>-14.318</td><td>49.465</td><td>117.996</td><td>284.31</td></tr> <tr><td>beta[5]</td><td>-191.80</td><td>-55.466</td><td>2.781</td><td>50.791</td><td>234.38</td></tr> </tbody> </table> <p>-- Model fit (residual deviance):</p> <table border="0"> <thead> <tr> <th>Dbar</th> <th>pD</th> <th>DIC</th> </tr> </thead> <tbody> <tr> <td>60.12699</td> <td>59.88563</td> <td>120.01263</td> </tr> </tbody> </table> <p>60 data points, ratio 1.002, I<sup>2</sup> = 2%</p> |  | Mean | SD | Naive SE | Time-series SE | d.1.2 | 3.195 | 31.97 | 0.07149 | 0.11707 | d.1.3 | 10.426 | 29.27 | 0.06545 | 0.06062 | d.1.4 | 63.410 | 62.45 | 0.13965 | 0.83461 | d.1.5 | 15.209 | 55.19 | 0.12341 | 2.51334 | sd.d | 92.756 | 28.64 | 0.06404 | 0.33395 | beta[2] | -134.064 | 267.77 | 0.59875 | 1.93663 | beta[3] | 75.541 | 196.18 | 0.43866 | 10.31818 | beta[4] | 53.412 | 111.77 | 0.24992 | 5.12928 | beta[5] | 3.580 | 97.12 | 0.21717 | 27.90645 |  | 2.5% | 25% | 50% | 75% | 97.5% | d.1.2 | -61.63 | -15.889 | 3.581 | 21.574 | 69.81 | d.1.3 | -48.36 | -6.985 | 10.090 | 27.180 | 72.30 | d.1.4 | -62.75 | 24.472 | 63.320 | 102.297 | 190.20 | d.1.5 | -96.90 | -17.612 | 15.501 | 47.220 | 130.31 | sd.d | 33.73 | 76.440 | 107.970 | 114.201 | 116.78 | beta[2] | -411.45 | -335.930 | -211.048 | -6.783 | 304.15 | beta[3] | -246.20 | -32.453 | 100.148 | 174.012 | 373.85 | beta[4] | -162.82 | -14.318 | 49.465 | 117.996 | 284.31 | beta[5] | -191.80 | -55.466 | 2.781 | 50.791 | 234.38 | Dbar | pD | DIC | 60.12699 | 59.88563 | 120.01263 |
|--------------------------------------------------------------------------------------------------------------------------------------------------------------------------------------------------------------------------------------------------------------------------------------------------------------------------------------------------------------------------------------------------------------------------------------------------------------------------------------------------------------------------------------------------------------------------------------------------------------------------------------------------------------------------------------------------------------------------------------------------------------------------------------------------------------------------------------------------------------------------------------------------------------------------------------------------------------------------------------------------------------------------------------------------------------------------------------------------------------------------------------------------------------------------------------------------------------------------------------------------------------------------------------------------------------------------------------------------------------------------------------------------------------------------------------------------------------------------------------------------------------------------------------------------------------------------------------------------------------------------------------------------------------------------------------------------------------------------------------------------------------------------------------------------------------------------------------------------------------------------------------------------------------------------------------------------------------------------------------------------------------------------------------------------------------------------------------------------------------------------------------------------------------------------------------------------------------------------------------------------------------------------------------------------------------------------------------------------------------------------------------------------------------------------------------------------------------------------------------|----------|-----------|----------|----------------|----------------|-------|--------|-------|---------|---------|-------|--------|-------|---------|---------|-------|--------|-------|---------|---------|-------|-------|-------|---------|---------|------|--------|-------|---------|---------|---------|--------|--------|---------|---------|---------|---------|--------|---------|---------|---------|---------|-------|---------|---------|---------|--------|-------|---------|---------|--|------|-----|-----|-----|-------|-------|--------|---------|--------|-------|-------|-------|--------|---------|--------|-------|-------|-------|--------|--------|--------|-------|--------|-------|--------|---------|-------|-------|-------|------|-------|--------|--------|-------|--------|---------|---------|---------|--------|--------|--------|---------|---------|----------|---------|-------|--------|---------|---------|----------|---------|-------|--------|---------|--------|--------|--------|-------|--------|------|----|-----|----------|----------|-----------|-----------------------------------------------------------------------------------------------------------------------------------------------------------------------------------------------------------------------------------------------------------------------------------------------------------------------------------------------------------------------------------------------------------------------------------------------------------------------------------------------------------------------------------------------------------------------------------------------------------------------------------------------------------------------------------------------------------------------------------------------------------------------------------------------------------------------------------------------------------------------------------------------------------------------------------------------------------------------------------------------------------------------------------------------------------------------------------------------------------------------------------------------------------------------------------------------------------------------------------------------------------------------------------------------------------------------------------------------------------------------------------------------------------------------------------------------------------------------------------------------------------------------------------------------------------------------------------------------------------------------------------------------------------------------------------------------------------------------------------------------------------------------------------------------------------------------------------------------------------------------------------------------------------------------------------------------------------------------------------------------------------------------------------------------------------------------------------------------------------------------------------------------------------------------------------------------------------------------------------------------------------------------------------------------------------------------------------------------------------------------------------------------------------------------------------------------------------------------------------------------------|--|------|----|----------|----------------|-------|-------|-------|---------|---------|-------|--------|-------|---------|---------|-------|--------|-------|---------|---------|-------|--------|-------|---------|---------|------|--------|-------|---------|---------|---------|----------|--------|---------|---------|---------|--------|--------|---------|----------|---------|--------|--------|---------|---------|---------|-------|-------|---------|----------|--|------|-----|-----|-----|-------|-------|--------|---------|-------|--------|-------|-------|--------|--------|--------|--------|-------|-------|--------|--------|--------|---------|--------|-------|--------|---------|--------|--------|--------|------|-------|--------|---------|---------|--------|---------|---------|----------|----------|--------|--------|---------|---------|---------|---------|---------|--------|---------|---------|---------|--------|---------|--------|---------|---------|---------|-------|--------|--------|------|----|-----|----------|----------|-----------|
|                                                                                                                                                                                                                                                                                                                                                                                                                                                                                                                                                                                                                                                                                                                                                                                                                                                                                                                                                                                                                                                                                                                                                                                                                                                                                                                                                                                                                                                                                                                                                                                                                                                                                                                                                                                                                                                                                                                                                                                                                                                                                                                                                                                                                                                                                                                                                                                                                                                                                      | Mean     | SD        | Naive SE | Time-series SE |                |       |        |       |         |         |       |        |       |         |         |       |        |       |         |         |       |       |       |         |         |      |        |       |         |         |         |        |        |         |         |         |         |        |         |         |         |         |       |         |         |         |        |       |         |         |  |      |     |     |     |       |       |        |         |        |       |       |       |        |         |        |       |       |       |        |        |        |       |        |       |        |         |       |       |       |      |       |        |        |       |        |         |         |         |        |        |        |         |         |          |         |       |        |         |         |          |         |       |        |         |        |        |        |       |        |      |    |     |          |          |           |                                                                                                                                                                                                                                                                                                                                                                                                                                                                                                                                                                                                                                                                                                                                                                                                                                                                                                                                                                                                                                                                                                                                                                                                                                                                                                                                                                                                                                                                                                                                                                                                                                                                                                                                                                                                                                                                                                                                                                                                                                                                                                                                                                                                                                                                                                                                                                                                                                                                                                     |  |      |    |          |                |       |       |       |         |         |       |        |       |         |         |       |        |       |         |         |       |        |       |         |         |      |        |       |         |         |         |          |        |         |         |         |        |        |         |          |         |        |        |         |         |         |       |       |         |          |  |      |     |     |     |       |       |        |         |       |        |       |       |        |        |        |        |       |       |        |        |        |         |        |       |        |         |        |        |        |      |       |        |         |         |        |         |         |          |          |        |        |         |         |         |         |         |        |         |         |         |        |         |        |         |         |         |       |        |        |      |    |     |          |          |           |
| d.1.2                                                                                                                                                                                                                                                                                                                                                                                                                                                                                                                                                                                                                                                                                                                                                                                                                                                                                                                                                                                                                                                                                                                                                                                                                                                                                                                                                                                                                                                                                                                                                                                                                                                                                                                                                                                                                                                                                                                                                                                                                                                                                                                                                                                                                                                                                                                                                                                                                                                                                | -5.486   | 33.26     | 0.07438  | 0.05904        |                |       |        |       |         |         |       |        |       |         |         |       |        |       |         |         |       |       |       |         |         |      |        |       |         |         |         |        |        |         |         |         |         |        |         |         |         |         |       |         |         |         |        |       |         |         |  |      |     |     |     |       |       |        |         |        |       |       |       |        |         |        |       |       |       |        |        |        |       |        |       |        |         |       |       |       |      |       |        |        |       |        |         |         |         |        |        |        |         |         |          |         |       |        |         |         |          |         |       |        |         |        |        |        |       |        |      |    |     |          |          |           |                                                                                                                                                                                                                                                                                                                                                                                                                                                                                                                                                                                                                                                                                                                                                                                                                                                                                                                                                                                                                                                                                                                                                                                                                                                                                                                                                                                                                                                                                                                                                                                                                                                                                                                                                                                                                                                                                                                                                                                                                                                                                                                                                                                                                                                                                                                                                                                                                                                                                                     |  |      |    |          |                |       |       |       |         |         |       |        |       |         |         |       |        |       |         |         |       |        |       |         |         |      |        |       |         |         |         |          |        |         |         |         |        |        |         |          |         |        |        |         |         |         |       |       |         |          |  |      |     |     |     |       |       |        |         |       |        |       |       |        |        |        |        |       |       |        |        |        |         |        |       |        |         |        |        |        |      |       |        |         |         |        |         |         |          |          |        |        |         |         |         |         |         |        |         |         |         |        |         |        |         |         |         |       |        |        |      |    |     |          |          |           |
| d.1.3                                                                                                                                                                                                                                                                                                                                                                                                                                                                                                                                                                                                                                                                                                                                                                                                                                                                                                                                                                                                                                                                                                                                                                                                                                                                                                                                                                                                                                                                                                                                                                                                                                                                                                                                                                                                                                                                                                                                                                                                                                                                                                                                                                                                                                                                                                                                                                                                                                                                                | -7.474   | 45.89     | 0.10261  | 0.07430        |                |       |        |       |         |         |       |        |       |         |         |       |        |       |         |         |       |       |       |         |         |      |        |       |         |         |         |        |        |         |         |         |         |        |         |         |         |         |       |         |         |         |        |       |         |         |  |      |     |     |     |       |       |        |         |        |       |       |       |        |         |        |       |       |       |        |        |        |       |        |       |        |         |       |       |       |      |       |        |        |       |        |         |         |         |        |        |        |         |         |          |         |       |        |         |         |          |         |       |        |         |        |        |        |       |        |      |    |     |          |          |           |                                                                                                                                                                                                                                                                                                                                                                                                                                                                                                                                                                                                                                                                                                                                                                                                                                                                                                                                                                                                                                                                                                                                                                                                                                                                                                                                                                                                                                                                                                                                                                                                                                                                                                                                                                                                                                                                                                                                                                                                                                                                                                                                                                                                                                                                                                                                                                                                                                                                                                     |  |      |    |          |                |       |       |       |         |         |       |        |       |         |         |       |        |       |         |         |       |        |       |         |         |      |        |       |         |         |         |          |        |         |         |         |        |        |         |          |         |        |        |         |         |         |       |       |         |          |  |      |     |     |     |       |       |        |         |       |        |       |       |        |        |        |        |       |       |        |        |        |         |        |       |        |         |        |        |        |      |       |        |         |         |        |         |         |          |          |        |        |         |         |         |         |         |        |         |         |         |        |         |        |         |         |         |       |        |        |      |    |     |          |          |           |
| d.1.4                                                                                                                                                                                                                                                                                                                                                                                                                                                                                                                                                                                                                                                                                                                                                                                                                                                                                                                                                                                                                                                                                                                                                                                                                                                                                                                                                                                                                                                                                                                                                                                                                                                                                                                                                                                                                                                                                                                                                                                                                                                                                                                                                                                                                                                                                                                                                                                                                                                                                | 53.634   | 46.24     | 0.10339  | 0.21210        |                |       |        |       |         |         |       |        |       |         |         |       |        |       |         |         |       |       |       |         |         |      |        |       |         |         |         |        |        |         |         |         |         |        |         |         |         |         |       |         |         |         |        |       |         |         |  |      |     |     |     |       |       |        |         |        |       |       |       |        |         |        |       |       |       |        |        |        |       |        |       |        |         |       |       |       |      |       |        |        |       |        |         |         |         |        |        |        |         |         |          |         |       |        |         |         |          |         |       |        |         |        |        |        |       |        |      |    |     |          |          |           |                                                                                                                                                                                                                                                                                                                                                                                                                                                                                                                                                                                                                                                                                                                                                                                                                                                                                                                                                                                                                                                                                                                                                                                                                                                                                                                                                                                                                                                                                                                                                                                                                                                                                                                                                                                                                                                                                                                                                                                                                                                                                                                                                                                                                                                                                                                                                                                                                                                                                                     |  |      |    |          |                |       |       |       |         |         |       |        |       |         |         |       |        |       |         |         |       |        |       |         |         |      |        |       |         |         |         |          |        |         |         |         |        |        |         |          |         |        |        |         |         |         |       |       |         |          |  |      |     |     |     |       |       |        |         |       |        |       |       |        |        |        |        |       |       |        |        |        |         |        |       |        |         |        |        |        |      |       |        |         |         |        |         |         |          |          |        |        |         |         |         |         |         |        |         |         |         |        |         |        |         |         |         |       |        |        |      |    |     |          |          |           |
| d.1.5                                                                                                                                                                                                                                                                                                                                                                                                                                                                                                                                                                                                                                                                                                                                                                                                                                                                                                                                                                                                                                                                                                                                                                                                                                                                                                                                                                                                                                                                                                                                                                                                                                                                                                                                                                                                                                                                                                                                                                                                                                                                                                                                                                                                                                                                                                                                                                                                                                                                                | 9.466    | 36.17     | 0.08089  | 0.24116        |                |       |        |       |         |         |       |        |       |         |         |       |        |       |         |         |       |       |       |         |         |      |        |       |         |         |         |        |        |         |         |         |         |        |         |         |         |         |       |         |         |         |        |       |         |         |  |      |     |     |     |       |       |        |         |        |       |       |       |        |         |        |       |       |       |        |        |        |       |        |       |        |         |       |       |       |      |       |        |        |       |        |         |         |         |        |        |        |         |         |          |         |       |        |         |         |          |         |       |        |         |        |        |        |       |        |      |    |     |          |          |           |                                                                                                                                                                                                                                                                                                                                                                                                                                                                                                                                                                                                                                                                                                                                                                                                                                                                                                                                                                                                                                                                                                                                                                                                                                                                                                                                                                                                                                                                                                                                                                                                                                                                                                                                                                                                                                                                                                                                                                                                                                                                                                                                                                                                                                                                                                                                                                                                                                                                                                     |  |      |    |          |                |       |       |       |         |         |       |        |       |         |         |       |        |       |         |         |       |        |       |         |         |      |        |       |         |         |         |          |        |         |         |         |        |        |         |          |         |        |        |         |         |         |       |       |         |          |  |      |     |     |     |       |       |        |         |       |        |       |       |        |        |        |        |       |       |        |        |        |         |        |       |        |         |        |        |        |      |       |        |         |         |        |         |         |          |          |        |        |         |         |         |         |         |        |         |         |         |        |         |        |         |         |         |       |        |        |      |    |     |          |          |           |
| sd.d                                                                                                                                                                                                                                                                                                                                                                                                                                                                                                                                                                                                                                                                                                                                                                                                                                                                                                                                                                                                                                                                                                                                                                                                                                                                                                                                                                                                                                                                                                                                                                                                                                                                                                                                                                                                                                                                                                                                                                                                                                                                                                                                                                                                                                                                                                                                                                                                                                                                                 | 72.784   | 14.20     | 0.03175  | 0.07296        |                |       |        |       |         |         |       |        |       |         |         |       |        |       |         |         |       |       |       |         |         |      |        |       |         |         |         |        |        |         |         |         |         |        |         |         |         |         |       |         |         |         |        |       |         |         |  |      |     |     |     |       |       |        |         |        |       |       |       |        |         |        |       |       |       |        |        |        |       |        |       |        |         |       |       |       |      |       |        |        |       |        |         |         |         |        |        |        |         |         |          |         |       |        |         |         |          |         |       |        |         |        |        |        |       |        |      |    |     |          |          |           |                                                                                                                                                                                                                                                                                                                                                                                                                                                                                                                                                                                                                                                                                                                                                                                                                                                                                                                                                                                                                                                                                                                                                                                                                                                                                                                                                                                                                                                                                                                                                                                                                                                                                                                                                                                                                                                                                                                                                                                                                                                                                                                                                                                                                                                                                                                                                                                                                                                                                                     |  |      |    |          |                |       |       |       |         |         |       |        |       |         |         |       |        |       |         |         |       |        |       |         |         |      |        |       |         |         |         |          |        |         |         |         |        |        |         |          |         |        |        |         |         |         |       |       |         |          |  |      |     |     |     |       |       |        |         |       |        |       |       |        |        |        |        |       |       |        |        |        |         |        |       |        |         |        |        |        |      |       |        |         |         |        |         |         |          |          |        |        |         |         |         |         |         |        |         |         |         |        |         |        |         |         |         |       |        |        |      |    |     |          |          |           |
| beta[2]                                                                                                                                                                                                                                                                                                                                                                                                                                                                                                                                                                                                                                                                                                                                                                                                                                                                                                                                                                                                                                                                                                                                                                                                                                                                                                                                                                                                                                                                                                                                                                                                                                                                                                                                                                                                                                                                                                                                                                                                                                                                                                                                                                                                                                                                                                                                                                                                                                                                              | 61.152   | 147.28    | 0.32932  | 2.68689        |                |       |        |       |         |         |       |        |       |         |         |       |        |       |         |         |       |       |       |         |         |      |        |       |         |         |         |        |        |         |         |         |         |        |         |         |         |         |       |         |         |         |        |       |         |         |  |      |     |     |     |       |       |        |         |        |       |       |       |        |         |        |       |       |       |        |        |        |       |        |       |        |         |       |       |       |      |       |        |        |       |        |         |         |         |        |        |        |         |         |          |         |       |        |         |         |          |         |       |        |         |        |        |        |       |        |      |    |     |          |          |           |                                                                                                                                                                                                                                                                                                                                                                                                                                                                                                                                                                                                                                                                                                                                                                                                                                                                                                                                                                                                                                                                                                                                                                                                                                                                                                                                                                                                                                                                                                                                                                                                                                                                                                                                                                                                                                                                                                                                                                                                                                                                                                                                                                                                                                                                                                                                                                                                                                                                                                     |  |      |    |          |                |       |       |       |         |         |       |        |       |         |         |       |        |       |         |         |       |        |       |         |         |      |        |       |         |         |         |          |        |         |         |         |        |        |         |          |         |        |        |         |         |         |       |       |         |          |  |      |     |     |     |       |       |        |         |       |        |       |       |        |        |        |        |       |       |        |        |        |         |        |       |        |         |        |        |        |      |       |        |         |         |        |         |         |          |          |        |        |         |         |         |         |         |        |         |         |         |        |         |        |         |         |         |       |        |        |      |    |     |          |          |           |
| beta[3]                                                                                                                                                                                                                                                                                                                                                                                                                                                                                                                                                                                                                                                                                                                                                                                                                                                                                                                                                                                                                                                                                                                                                                                                                                                                                                                                                                                                                                                                                                                                                                                                                                                                                                                                                                                                                                                                                                                                                                                                                                                                                                                                                                                                                                                                                                                                                                                                                                                                              | -52.624  | 173.51    | 0.38797  | 2.48008        |                |       |        |       |         |         |       |        |       |         |         |       |        |       |         |         |       |       |       |         |         |      |        |       |         |         |         |        |        |         |         |         |         |        |         |         |         |         |       |         |         |         |        |       |         |         |  |      |     |     |     |       |       |        |         |        |       |       |       |        |         |        |       |       |       |        |        |        |       |        |       |        |         |       |       |       |      |       |        |        |       |        |         |         |         |        |        |        |         |         |          |         |       |        |         |         |          |         |       |        |         |        |        |        |       |        |      |    |     |          |          |           |                                                                                                                                                                                                                                                                                                                                                                                                                                                                                                                                                                                                                                                                                                                                                                                                                                                                                                                                                                                                                                                                                                                                                                                                                                                                                                                                                                                                                                                                                                                                                                                                                                                                                                                                                                                                                                                                                                                                                                                                                                                                                                                                                                                                                                                                                                                                                                                                                                                                                                     |  |      |    |          |                |       |       |       |         |         |       |        |       |         |         |       |        |       |         |         |       |        |       |         |         |      |        |       |         |         |         |          |        |         |         |         |        |        |         |          |         |        |        |         |         |         |       |       |         |          |  |      |     |     |     |       |       |        |         |       |        |       |       |        |        |        |        |       |       |        |        |        |         |        |       |        |         |        |        |        |      |       |        |         |         |        |         |         |          |          |        |        |         |         |         |         |         |        |         |         |         |        |         |        |         |         |         |       |        |        |      |    |     |          |          |           |
| beta[4]                                                                                                                                                                                                                                                                                                                                                                                                                                                                                                                                                                                                                                                                                                                                                                                                                                                                                                                                                                                                                                                                                                                                                                                                                                                                                                                                                                                                                                                                                                                                                                                                                                                                                                                                                                                                                                                                                                                                                                                                                                                                                                                                                                                                                                                                                                                                                                                                                                                                              | -46.523  | 90.23     | 0.20175  | 1.67674        |                |       |        |       |         |         |       |        |       |         |         |       |        |       |         |         |       |       |       |         |         |      |        |       |         |         |         |        |        |         |         |         |         |        |         |         |         |         |       |         |         |         |        |       |         |         |  |      |     |     |     |       |       |        |         |        |       |       |       |        |         |        |       |       |       |        |        |        |       |        |       |        |         |       |       |       |      |       |        |        |       |        |         |         |         |        |        |        |         |         |          |         |       |        |         |         |          |         |       |        |         |        |        |        |       |        |      |    |     |          |          |           |                                                                                                                                                                                                                                                                                                                                                                                                                                                                                                                                                                                                                                                                                                                                                                                                                                                                                                                                                                                                                                                                                                                                                                                                                                                                                                                                                                                                                                                                                                                                                                                                                                                                                                                                                                                                                                                                                                                                                                                                                                                                                                                                                                                                                                                                                                                                                                                                                                                                                                     |  |      |    |          |                |       |       |       |         |         |       |        |       |         |         |       |        |       |         |         |       |        |       |         |         |      |        |       |         |         |         |          |        |         |         |         |        |        |         |          |         |        |        |         |         |         |       |       |         |          |  |      |     |     |     |       |       |        |         |       |        |       |       |        |        |        |        |       |       |        |        |        |         |        |       |        |         |        |        |        |      |       |        |         |         |        |         |         |          |          |        |        |         |         |         |         |         |        |         |         |         |        |         |        |         |         |         |       |        |        |      |    |     |          |          |           |
| beta[5]                                                                                                                                                                                                                                                                                                                                                                                                                                                                                                                                                                                                                                                                                                                                                                                                                                                                                                                                                                                                                                                                                                                                                                                                                                                                                                                                                                                                                                                                                                                                                                                                                                                                                                                                                                                                                                                                                                                                                                                                                                                                                                                                                                                                                                                                                                                                                                                                                                                                              | 22.289   | 40.41     | 0.09036  | 4.79158        |                |       |        |       |         |         |       |        |       |         |         |       |        |       |         |         |       |       |       |         |         |      |        |       |         |         |         |        |        |         |         |         |         |        |         |         |         |         |       |         |         |         |        |       |         |         |  |      |     |     |     |       |       |        |         |        |       |       |       |        |         |        |       |       |       |        |        |        |       |        |       |        |         |       |       |       |      |       |        |        |       |        |         |         |         |        |        |        |         |         |          |         |       |        |         |         |          |         |       |        |         |        |        |        |       |        |      |    |     |          |          |           |                                                                                                                                                                                                                                                                                                                                                                                                                                                                                                                                                                                                                                                                                                                                                                                                                                                                                                                                                                                                                                                                                                                                                                                                                                                                                                                                                                                                                                                                                                                                                                                                                                                                                                                                                                                                                                                                                                                                                                                                                                                                                                                                                                                                                                                                                                                                                                                                                                                                                                     |  |      |    |          |                |       |       |       |         |         |       |        |       |         |         |       |        |       |         |         |       |        |       |         |         |      |        |       |         |         |         |          |        |         |         |         |        |        |         |          |         |        |        |         |         |         |       |       |         |          |  |      |     |     |     |       |       |        |         |       |        |       |       |        |        |        |        |       |       |        |        |        |         |        |       |        |         |        |        |        |      |       |        |         |         |        |         |         |          |          |        |        |         |         |         |         |         |        |         |         |         |        |         |        |         |         |         |       |        |        |      |    |     |          |          |           |
|                                                                                                                                                                                                                                                                                                                                                                                                                                                                                                                                                                                                                                                                                                                                                                                                                                                                                                                                                                                                                                                                                                                                                                                                                                                                                                                                                                                                                                                                                                                                                                                                                                                                                                                                                                                                                                                                                                                                                                                                                                                                                                                                                                                                                                                                                                                                                                                                                                                                                      | 2.5%     | 25%       | 50%      | 75%            | 97.5%          |       |        |       |         |         |       |        |       |         |         |       |        |       |         |         |       |       |       |         |         |      |        |       |         |         |         |        |        |         |         |         |         |        |         |         |         |         |       |         |         |         |        |       |         |         |  |      |     |     |     |       |       |        |         |        |       |       |       |        |         |        |       |       |       |        |        |        |       |        |       |        |         |       |       |       |      |       |        |        |       |        |         |         |         |        |        |        |         |         |          |         |       |        |         |         |          |         |       |        |         |        |        |        |       |        |      |    |     |          |          |           |                                                                                                                                                                                                                                                                                                                                                                                                                                                                                                                                                                                                                                                                                                                                                                                                                                                                                                                                                                                                                                                                                                                                                                                                                                                                                                                                                                                                                                                                                                                                                                                                                                                                                                                                                                                                                                                                                                                                                                                                                                                                                                                                                                                                                                                                                                                                                                                                                                                                                                     |  |      |    |          |                |       |       |       |         |         |       |        |       |         |         |       |        |       |         |         |       |        |       |         |         |      |        |       |         |         |         |          |        |         |         |         |        |        |         |          |         |        |        |         |         |         |       |       |         |          |  |      |     |     |     |       |       |        |         |       |        |       |       |        |        |        |        |       |       |        |        |        |         |        |       |        |         |        |        |        |      |       |        |         |         |        |         |         |          |          |        |        |         |         |         |         |         |        |         |         |         |        |         |        |         |         |         |       |        |        |      |    |     |          |          |           |
| d.1.2                                                                                                                                                                                                                                                                                                                                                                                                                                                                                                                                                                                                                                                                                                                                                                                                                                                                                                                                                                                                                                                                                                                                                                                                                                                                                                                                                                                                                                                                                                                                                                                                                                                                                                                                                                                                                                                                                                                                                                                                                                                                                                                                                                                                                                                                                                                                                                                                                                                                                | -65.21   | -30.814   | -7.270   | 20.44          | 56.64          |       |        |       |         |         |       |        |       |         |         |       |        |       |         |         |       |       |       |         |         |      |        |       |         |         |         |        |        |         |         |         |         |        |         |         |         |         |       |         |         |         |        |       |         |         |  |      |     |     |     |       |       |        |         |        |       |       |       |        |         |        |       |       |       |        |        |        |       |        |       |        |         |       |       |       |      |       |        |        |       |        |         |         |         |        |        |        |         |         |          |         |       |        |         |         |          |         |       |        |         |        |        |        |       |        |      |    |     |          |          |           |                                                                                                                                                                                                                                                                                                                                                                                                                                                                                                                                                                                                                                                                                                                                                                                                                                                                                                                                                                                                                                                                                                                                                                                                                                                                                                                                                                                                                                                                                                                                                                                                                                                                                                                                                                                                                                                                                                                                                                                                                                                                                                                                                                                                                                                                                                                                                                                                                                                                                                     |  |      |    |          |                |       |       |       |         |         |       |        |       |         |         |       |        |       |         |         |       |        |       |         |         |      |        |       |         |         |         |          |        |         |         |         |        |        |         |          |         |        |        |         |         |         |       |       |         |          |  |      |     |     |     |       |       |        |         |       |        |       |       |        |        |        |        |       |       |        |        |        |         |        |       |        |         |        |        |        |      |       |        |         |         |        |         |         |          |          |        |        |         |         |         |         |         |        |         |         |         |        |         |        |         |         |         |       |        |        |      |    |     |          |          |           |
| d.1.3                                                                                                                                                                                                                                                                                                                                                                                                                                                                                                                                                                                                                                                                                                                                                                                                                                                                                                                                                                                                                                                                                                                                                                                                                                                                                                                                                                                                                                                                                                                                                                                                                                                                                                                                                                                                                                                                                                                                                                                                                                                                                                                                                                                                                                                                                                                                                                                                                                                                                | -98.84   | -40.537   | -2.725   | 29.49          | 65.69          |       |        |       |         |         |       |        |       |         |         |       |        |       |         |         |       |       |       |         |         |      |        |       |         |         |         |        |        |         |         |         |         |        |         |         |         |         |       |         |         |         |        |       |         |         |  |      |     |     |     |       |       |        |         |        |       |       |       |        |         |        |       |       |       |        |        |        |       |        |       |        |         |       |       |       |      |       |        |        |       |        |         |         |         |        |        |        |         |         |          |         |       |        |         |         |          |         |       |        |         |        |        |        |       |        |      |    |     |          |          |           |                                                                                                                                                                                                                                                                                                                                                                                                                                                                                                                                                                                                                                                                                                                                                                                                                                                                                                                                                                                                                                                                                                                                                                                                                                                                                                                                                                                                                                                                                                                                                                                                                                                                                                                                                                                                                                                                                                                                                                                                                                                                                                                                                                                                                                                                                                                                                                                                                                                                                                     |  |      |    |          |                |       |       |       |         |         |       |        |       |         |         |       |        |       |         |         |       |        |       |         |         |      |        |       |         |         |         |          |        |         |         |         |        |        |         |          |         |        |        |         |         |         |       |       |         |          |  |      |     |     |     |       |       |        |         |       |        |       |       |        |        |        |        |       |       |        |        |        |         |        |       |        |         |        |        |        |      |       |        |         |         |        |         |         |          |          |        |        |         |         |         |         |         |        |         |         |         |        |         |        |         |         |         |       |        |        |      |    |     |          |          |           |
| d.1.4                                                                                                                                                                                                                                                                                                                                                                                                                                                                                                                                                                                                                                                                                                                                                                                                                                                                                                                                                                                                                                                                                                                                                                                                                                                                                                                                                                                                                                                                                                                                                                                                                                                                                                                                                                                                                                                                                                                                                                                                                                                                                                                                                                                                                                                                                                                                                                                                                                                                                | -37.48   | 23.302    | 53.691   | 83.77          | 145.33         |       |        |       |         |         |       |        |       |         |         |       |        |       |         |         |       |       |       |         |         |      |        |       |         |         |         |        |        |         |         |         |         |        |         |         |         |         |       |         |         |         |        |       |         |         |  |      |     |     |     |       |       |        |         |        |       |       |       |        |         |        |       |       |       |        |        |        |       |        |       |        |         |       |       |       |      |       |        |        |       |        |         |         |         |        |        |        |         |         |          |         |       |        |         |         |          |         |       |        |         |        |        |        |       |        |      |    |     |          |          |           |                                                                                                                                                                                                                                                                                                                                                                                                                                                                                                                                                                                                                                                                                                                                                                                                                                                                                                                                                                                                                                                                                                                                                                                                                                                                                                                                                                                                                                                                                                                                                                                                                                                                                                                                                                                                                                                                                                                                                                                                                                                                                                                                                                                                                                                                                                                                                                                                                                                                                                     |  |      |    |          |                |       |       |       |         |         |       |        |       |         |         |       |        |       |         |         |       |        |       |         |         |      |        |       |         |         |         |          |        |         |         |         |        |        |         |          |         |        |        |         |         |         |       |       |         |          |  |      |     |     |     |       |       |        |         |       |        |       |       |        |        |        |        |       |       |        |        |        |         |        |       |        |         |        |        |        |      |       |        |         |         |        |         |         |          |          |        |        |         |         |         |         |         |        |         |         |         |        |         |        |         |         |         |       |        |        |      |    |     |          |          |           |
| d.1.5                                                                                                                                                                                                                                                                                                                                                                                                                                                                                                                                                                                                                                                                                                                                                                                                                                                                                                                                                                                                                                                                                                                                                                                                                                                                                                                                                                                                                                                                                                                                                                                                                                                                                                                                                                                                                                                                                                                                                                                                                                                                                                                                                                                                                                                                                                                                                                                                                                                                                | -61.68   | -14.519   | 9.587    | 33.49          | 80.22          |       |        |       |         |         |       |        |       |         |         |       |        |       |         |         |       |       |       |         |         |      |        |       |         |         |         |        |        |         |         |         |         |        |         |         |         |         |       |         |         |         |        |       |         |         |  |      |     |     |     |       |       |        |         |        |       |       |       |        |         |        |       |       |       |        |        |        |       |        |       |        |         |       |       |       |      |       |        |        |       |        |         |         |         |        |        |        |         |         |          |         |       |        |         |         |          |         |       |        |         |        |        |        |       |        |      |    |     |          |          |           |                                                                                                                                                                                                                                                                                                                                                                                                                                                                                                                                                                                                                                                                                                                                                                                                                                                                                                                                                                                                                                                                                                                                                                                                                                                                                                                                                                                                                                                                                                                                                                                                                                                                                                                                                                                                                                                                                                                                                                                                                                                                                                                                                                                                                                                                                                                                                                                                                                                                                                     |  |      |    |          |                |       |       |       |         |         |       |        |       |         |         |       |        |       |         |         |       |        |       |         |         |      |        |       |         |         |         |          |        |         |         |         |        |        |         |          |         |        |        |         |         |         |       |       |         |          |  |      |     |     |     |       |       |        |         |       |        |       |       |        |        |        |        |       |       |        |        |        |         |        |       |        |         |        |        |        |      |       |        |         |         |        |         |         |          |          |        |        |         |         |         |         |         |        |         |         |         |        |         |        |         |         |         |       |        |        |      |    |     |          |          |           |
| sd.d                                                                                                                                                                                                                                                                                                                                                                                                                                                                                                                                                                                                                                                                                                                                                                                                                                                                                                                                                                                                                                                                                                                                                                                                                                                                                                                                                                                                                                                                                                                                                                                                                                                                                                                                                                                                                                                                                                                                                                                                                                                                                                                                                                                                                                                                                                                                                                                                                                                                                 | 49.76    | 62.281    | 70.982   | 81.75          | 104.89         |       |        |       |         |         |       |        |       |         |         |       |        |       |         |         |       |       |       |         |         |      |        |       |         |         |         |        |        |         |         |         |         |        |         |         |         |         |       |         |         |         |        |       |         |         |  |      |     |     |     |       |       |        |         |        |       |       |       |        |         |        |       |       |       |        |        |        |       |        |       |        |         |       |       |       |      |       |        |        |       |        |         |         |         |        |        |        |         |         |          |         |       |        |         |         |          |         |       |        |         |        |        |        |       |        |      |    |     |          |          |           |                                                                                                                                                                                                                                                                                                                                                                                                                                                                                                                                                                                                                                                                                                                                                                                                                                                                                                                                                                                                                                                                                                                                                                                                                                                                                                                                                                                                                                                                                                                                                                                                                                                                                                                                                                                                                                                                                                                                                                                                                                                                                                                                                                                                                                                                                                                                                                                                                                                                                                     |  |      |    |          |                |       |       |       |         |         |       |        |       |         |         |       |        |       |         |         |       |        |       |         |         |      |        |       |         |         |         |          |        |         |         |         |        |        |         |          |         |        |        |         |         |         |       |       |         |          |  |      |     |     |     |       |       |        |         |       |        |       |       |        |        |        |        |       |       |        |        |        |         |        |       |        |         |        |        |        |      |       |        |         |         |        |         |         |          |          |        |        |         |         |         |         |         |        |         |         |         |        |         |        |         |         |         |       |        |        |      |    |     |          |          |           |
| beta[2]                                                                                                                                                                                                                                                                                                                                                                                                                                                                                                                                                                                                                                                                                                                                                                                                                                                                                                                                                                                                                                                                                                                                                                                                                                                                                                                                                                                                                                                                                                                                                                                                                                                                                                                                                                                                                                                                                                                                                                                                                                                                                                                                                                                                                                                                                                                                                                                                                                                                              | -177.90  | -45.205   | 95.149   | 197.73         | 219.81         |       |        |       |         |         |       |        |       |         |         |       |        |       |         |         |       |       |       |         |         |      |        |       |         |         |         |        |        |         |         |         |         |        |         |         |         |         |       |         |         |         |        |       |         |         |  |      |     |     |     |       |       |        |         |        |       |       |       |        |         |        |       |       |       |        |        |        |       |        |       |        |         |       |       |       |      |       |        |        |       |        |         |         |         |        |        |        |         |         |          |         |       |        |         |         |          |         |       |        |         |        |        |        |       |        |      |    |     |          |          |           |                                                                                                                                                                                                                                                                                                                                                                                                                                                                                                                                                                                                                                                                                                                                                                                                                                                                                                                                                                                                                                                                                                                                                                                                                                                                                                                                                                                                                                                                                                                                                                                                                                                                                                                                                                                                                                                                                                                                                                                                                                                                                                                                                                                                                                                                                                                                                                                                                                                                                                     |  |      |    |          |                |       |       |       |         |         |       |        |       |         |         |       |        |       |         |         |       |        |       |         |         |      |        |       |         |         |         |          |        |         |         |         |        |        |         |          |         |        |        |         |         |         |       |       |         |          |  |      |     |     |     |       |       |        |         |       |        |       |       |        |        |        |        |       |       |        |        |        |         |        |       |        |         |        |        |        |      |       |        |         |         |        |         |         |          |          |        |        |         |         |         |         |         |        |         |         |         |        |         |        |         |         |         |       |        |        |      |    |     |          |          |           |
| beta[3]                                                                                                                                                                                                                                                                                                                                                                                                                                                                                                                                                                                                                                                                                                                                                                                                                                                                                                                                                                                                                                                                                                                                                                                                                                                                                                                                                                                                                                                                                                                                                                                                                                                                                                                                                                                                                                                                                                                                                                                                                                                                                                                                                                                                                                                                                                                                                                                                                                                                              | -303.22  | -188.890  | -29.329  | 95.77          | 153.45         |       |        |       |         |         |       |        |       |         |         |       |        |       |         |         |       |       |       |         |         |      |        |       |         |         |         |        |        |         |         |         |         |        |         |         |         |         |       |         |         |         |        |       |         |         |  |      |     |     |     |       |       |        |         |        |       |       |       |        |         |        |       |       |       |        |        |        |       |        |       |        |         |       |       |       |      |       |        |        |       |        |         |         |         |        |        |        |         |         |          |         |       |        |         |         |          |         |       |        |         |        |        |        |       |        |      |    |     |          |          |           |                                                                                                                                                                                                                                                                                                                                                                                                                                                                                                                                                                                                                                                                                                                                                                                                                                                                                                                                                                                                                                                                                                                                                                                                                                                                                                                                                                                                                                                                                                                                                                                                                                                                                                                                                                                                                                                                                                                                                                                                                                                                                                                                                                                                                                                                                                                                                                                                                                                                                                     |  |      |    |          |                |       |       |       |         |         |       |        |       |         |         |       |        |       |         |         |       |        |       |         |         |      |        |       |         |         |         |          |        |         |         |         |        |        |         |          |         |        |        |         |         |         |       |       |         |          |  |      |     |     |     |       |       |        |         |       |        |       |       |        |        |        |        |       |       |        |        |        |         |        |       |        |         |        |        |        |      |       |        |         |         |        |         |         |          |          |        |        |         |         |         |         |         |        |         |         |         |        |         |        |         |         |         |       |        |        |      |    |     |          |          |           |
| beta[4]                                                                                                                                                                                                                                                                                                                                                                                                                                                                                                                                                                                                                                                                                                                                                                                                                                                                                                                                                                                                                                                                                                                                                                                                                                                                                                                                                                                                                                                                                                                                                                                                                                                                                                                                                                                                                                                                                                                                                                                                                                                                                                                                                                                                                                                                                                                                                                                                                                                                              | -236.99  | -101.322  | -42.237  | 11.40          | 124.19         |       |        |       |         |         |       |        |       |         |         |       |        |       |         |         |       |       |       |         |         |      |        |       |         |         |         |        |        |         |         |         |         |        |         |         |         |         |       |         |         |         |        |       |         |         |  |      |     |     |     |       |       |        |         |        |       |       |       |        |         |        |       |       |       |        |        |        |       |        |       |        |         |       |       |       |      |       |        |        |       |        |         |         |         |        |        |        |         |         |          |         |       |        |         |         |          |         |       |        |         |        |        |        |       |        |      |    |     |          |          |           |                                                                                                                                                                                                                                                                                                                                                                                                                                                                                                                                                                                                                                                                                                                                                                                                                                                                                                                                                                                                                                                                                                                                                                                                                                                                                                                                                                                                                                                                                                                                                                                                                                                                                                                                                                                                                                                                                                                                                                                                                                                                                                                                                                                                                                                                                                                                                                                                                                                                                                     |  |      |    |          |                |       |       |       |         |         |       |        |       |         |         |       |        |       |         |         |       |        |       |         |         |      |        |       |         |         |         |          |        |         |         |         |        |        |         |          |         |        |        |         |         |         |       |       |         |          |  |      |     |     |     |       |       |        |         |       |        |       |       |        |        |        |        |       |       |        |        |        |         |        |       |        |         |        |        |        |      |       |        |         |         |        |         |         |          |          |        |        |         |         |         |         |         |        |         |         |         |        |         |        |         |         |         |       |        |        |      |    |     |          |          |           |
| beta[5]                                                                                                                                                                                                                                                                                                                                                                                                                                                                                                                                                                                                                                                                                                                                                                                                                                                                                                                                                                                                                                                                                                                                                                                                                                                                                                                                                                                                                                                                                                                                                                                                                                                                                                                                                                                                                                                                                                                                                                                                                                                                                                                                                                                                                                                                                                                                                                                                                                                                              | -58.43   | -3.595    | 21.564   | 48.67          | 105.27         |       |        |       |         |         |       |        |       |         |         |       |        |       |         |         |       |       |       |         |         |      |        |       |         |         |         |        |        |         |         |         |         |        |         |         |         |         |       |         |         |         |        |       |         |         |  |      |     |     |     |       |       |        |         |        |       |       |       |        |         |        |       |       |       |        |        |        |       |        |       |        |         |       |       |       |      |       |        |        |       |        |         |         |         |        |        |        |         |         |          |         |       |        |         |         |          |         |       |        |         |        |        |        |       |        |      |    |     |          |          |           |                                                                                                                                                                                                                                                                                                                                                                                                                                                                                                                                                                                                                                                                                                                                                                                                                                                                                                                                                                                                                                                                                                                                                                                                                                                                                                                                                                                                                                                                                                                                                                                                                                                                                                                                                                                                                                                                                                                                                                                                                                                                                                                                                                                                                                                                                                                                                                                                                                                                                                     |  |      |    |          |                |       |       |       |         |         |       |        |       |         |         |       |        |       |         |         |       |        |       |         |         |      |        |       |         |         |         |          |        |         |         |         |        |        |         |          |         |        |        |         |         |         |       |       |         |          |  |      |     |     |     |       |       |        |         |       |        |       |       |        |        |        |        |       |       |        |        |        |         |        |       |        |         |        |        |        |      |       |        |         |         |        |         |         |          |          |        |        |         |         |         |         |         |        |         |         |         |        |         |        |         |         |         |       |        |        |      |    |     |          |          |           |
| Dbar                                                                                                                                                                                                                                                                                                                                                                                                                                                                                                                                                                                                                                                                                                                                                                                                                                                                                                                                                                                                                                                                                                                                                                                                                                                                                                                                                                                                                                                                                                                                                                                                                                                                                                                                                                                                                                                                                                                                                                                                                                                                                                                                                                                                                                                                                                                                                                                                                                                                                 | pD       | DIC       |          |                |                |       |        |       |         |         |       |        |       |         |         |       |        |       |         |         |       |       |       |         |         |      |        |       |         |         |         |        |        |         |         |         |         |        |         |         |         |         |       |         |         |         |        |       |         |         |  |      |     |     |     |       |       |        |         |        |       |       |       |        |         |        |       |       |       |        |        |        |       |        |       |        |         |       |       |       |      |       |        |        |       |        |         |         |         |        |        |        |         |         |          |         |       |        |         |         |          |         |       |        |         |        |        |        |       |        |      |    |     |          |          |           |                                                                                                                                                                                                                                                                                                                                                                                                                                                                                                                                                                                                                                                                                                                                                                                                                                                                                                                                                                                                                                                                                                                                                                                                                                                                                                                                                                                                                                                                                                                                                                                                                                                                                                                                                                                                                                                                                                                                                                                                                                                                                                                                                                                                                                                                                                                                                                                                                                                                                                     |  |      |    |          |                |       |       |       |         |         |       |        |       |         |         |       |        |       |         |         |       |        |       |         |         |      |        |       |         |         |         |          |        |         |         |         |        |        |         |          |         |        |        |         |         |         |       |       |         |          |  |      |     |     |     |       |       |        |         |       |        |       |       |        |        |        |        |       |       |        |        |        |         |        |       |        |         |        |        |        |      |       |        |         |         |        |         |         |          |          |        |        |         |         |         |         |         |        |         |         |         |        |         |        |         |         |         |       |        |        |      |    |     |          |          |           |
| 59.68413                                                                                                                                                                                                                                                                                                                                                                                                                                                                                                                                                                                                                                                                                                                                                                                                                                                                                                                                                                                                                                                                                                                                                                                                                                                                                                                                                                                                                                                                                                                                                                                                                                                                                                                                                                                                                                                                                                                                                                                                                                                                                                                                                                                                                                                                                                                                                                                                                                                                             | 59.57809 | 119.26222 |          |                |                |       |        |       |         |         |       |        |       |         |         |       |        |       |         |         |       |       |       |         |         |      |        |       |         |         |         |        |        |         |         |         |         |        |         |         |         |         |       |         |         |         |        |       |         |         |  |      |     |     |     |       |       |        |         |        |       |       |       |        |         |        |       |       |       |        |        |        |       |        |       |        |         |       |       |       |      |       |        |        |       |        |         |         |         |        |        |        |         |         |          |         |       |        |         |         |          |         |       |        |         |        |        |        |       |        |      |    |     |          |          |           |                                                                                                                                                                                                                                                                                                                                                                                                                                                                                                                                                                                                                                                                                                                                                                                                                                                                                                                                                                                                                                                                                                                                                                                                                                                                                                                                                                                                                                                                                                                                                                                                                                                                                                                                                                                                                                                                                                                                                                                                                                                                                                                                                                                                                                                                                                                                                                                                                                                                                                     |  |      |    |          |                |       |       |       |         |         |       |        |       |         |         |       |        |       |         |         |       |        |       |         |         |      |        |       |         |         |         |          |        |         |         |         |        |        |         |          |         |        |        |         |         |         |       |       |         |          |  |      |     |     |     |       |       |        |         |       |        |       |       |        |        |        |        |       |       |        |        |        |         |        |       |        |         |        |        |        |      |       |        |         |         |        |         |         |          |          |        |        |         |         |         |         |         |        |         |         |         |        |         |        |         |         |         |       |        |        |      |    |     |          |          |           |
|                                                                                                                                                                                                                                                                                                                                                                                                                                                                                                                                                                                                                                                                                                                                                                                                                                                                                                                                                                                                                                                                                                                                                                                                                                                                                                                                                                                                                                                                                                                                                                                                                                                                                                                                                                                                                                                                                                                                                                                                                                                                                                                                                                                                                                                                                                                                                                                                                                                                                      | Mean     | SD        | Naive SE | Time-series SE |                |       |        |       |         |         |       |        |       |         |         |       |        |       |         |         |       |       |       |         |         |      |        |       |         |         |         |        |        |         |         |         |         |        |         |         |         |         |       |         |         |         |        |       |         |         |  |      |     |     |     |       |       |        |         |        |       |       |       |        |         |        |       |       |       |        |        |        |       |        |       |        |         |       |       |       |      |       |        |        |       |        |         |         |         |        |        |        |         |         |          |         |       |        |         |         |          |         |       |        |         |        |        |        |       |        |      |    |     |          |          |           |                                                                                                                                                                                                                                                                                                                                                                                                                                                                                                                                                                                                                                                                                                                                                                                                                                                                                                                                                                                                                                                                                                                                                                                                                                                                                                                                                                                                                                                                                                                                                                                                                                                                                                                                                                                                                                                                                                                                                                                                                                                                                                                                                                                                                                                                                                                                                                                                                                                                                                     |  |      |    |          |                |       |       |       |         |         |       |        |       |         |         |       |        |       |         |         |       |        |       |         |         |      |        |       |         |         |         |          |        |         |         |         |        |        |         |          |         |        |        |         |         |         |       |       |         |          |  |      |     |     |     |       |       |        |         |       |        |       |       |        |        |        |        |       |       |        |        |        |         |        |       |        |         |        |        |        |      |       |        |         |         |        |         |         |          |          |        |        |         |         |         |         |         |        |         |         |         |        |         |        |         |         |         |       |        |        |      |    |     |          |          |           |
| d.1.2                                                                                                                                                                                                                                                                                                                                                                                                                                                                                                                                                                                                                                                                                                                                                                                                                                                                                                                                                                                                                                                                                                                                                                                                                                                                                                                                                                                                                                                                                                                                                                                                                                                                                                                                                                                                                                                                                                                                                                                                                                                                                                                                                                                                                                                                                                                                                                                                                                                                                | 3.195    | 31.97     | 0.07149  | 0.11707        |                |       |        |       |         |         |       |        |       |         |         |       |        |       |         |         |       |       |       |         |         |      |        |       |         |         |         |        |        |         |         |         |         |        |         |         |         |         |       |         |         |         |        |       |         |         |  |      |     |     |     |       |       |        |         |        |       |       |       |        |         |        |       |       |       |        |        |        |       |        |       |        |         |       |       |       |      |       |        |        |       |        |         |         |         |        |        |        |         |         |          |         |       |        |         |         |          |         |       |        |         |        |        |        |       |        |      |    |     |          |          |           |                                                                                                                                                                                                                                                                                                                                                                                                                                                                                                                                                                                                                                                                                                                                                                                                                                                                                                                                                                                                                                                                                                                                                                                                                                                                                                                                                                                                                                                                                                                                                                                                                                                                                                                                                                                                                                                                                                                                                                                                                                                                                                                                                                                                                                                                                                                                                                                                                                                                                                     |  |      |    |          |                |       |       |       |         |         |       |        |       |         |         |       |        |       |         |         |       |        |       |         |         |      |        |       |         |         |         |          |        |         |         |         |        |        |         |          |         |        |        |         |         |         |       |       |         |          |  |      |     |     |     |       |       |        |         |       |        |       |       |        |        |        |        |       |       |        |        |        |         |        |       |        |         |        |        |        |      |       |        |         |         |        |         |         |          |          |        |        |         |         |         |         |         |        |         |         |         |        |         |        |         |         |         |       |        |        |      |    |     |          |          |           |
| d.1.3                                                                                                                                                                                                                                                                                                                                                                                                                                                                                                                                                                                                                                                                                                                                                                                                                                                                                                                                                                                                                                                                                                                                                                                                                                                                                                                                                                                                                                                                                                                                                                                                                                                                                                                                                                                                                                                                                                                                                                                                                                                                                                                                                                                                                                                                                                                                                                                                                                                                                | 10.426   | 29.27     | 0.06545  | 0.06062        |                |       |        |       |         |         |       |        |       |         |         |       |        |       |         |         |       |       |       |         |         |      |        |       |         |         |         |        |        |         |         |         |         |        |         |         |         |         |       |         |         |         |        |       |         |         |  |      |     |     |     |       |       |        |         |        |       |       |       |        |         |        |       |       |       |        |        |        |       |        |       |        |         |       |       |       |      |       |        |        |       |        |         |         |         |        |        |        |         |         |          |         |       |        |         |         |          |         |       |        |         |        |        |        |       |        |      |    |     |          |          |           |                                                                                                                                                                                                                                                                                                                                                                                                                                                                                                                                                                                                                                                                                                                                                                                                                                                                                                                                                                                                                                                                                                                                                                                                                                                                                                                                                                                                                                                                                                                                                                                                                                                                                                                                                                                                                                                                                                                                                                                                                                                                                                                                                                                                                                                                                                                                                                                                                                                                                                     |  |      |    |          |                |       |       |       |         |         |       |        |       |         |         |       |        |       |         |         |       |        |       |         |         |      |        |       |         |         |         |          |        |         |         |         |        |        |         |          |         |        |        |         |         |         |       |       |         |          |  |      |     |     |     |       |       |        |         |       |        |       |       |        |        |        |        |       |       |        |        |        |         |        |       |        |         |        |        |        |      |       |        |         |         |        |         |         |          |          |        |        |         |         |         |         |         |        |         |         |         |        |         |        |         |         |         |       |        |        |      |    |     |          |          |           |
| d.1.4                                                                                                                                                                                                                                                                                                                                                                                                                                                                                                                                                                                                                                                                                                                                                                                                                                                                                                                                                                                                                                                                                                                                                                                                                                                                                                                                                                                                                                                                                                                                                                                                                                                                                                                                                                                                                                                                                                                                                                                                                                                                                                                                                                                                                                                                                                                                                                                                                                                                                | 63.410   | 62.45     | 0.13965  | 0.83461        |                |       |        |       |         |         |       |        |       |         |         |       |        |       |         |         |       |       |       |         |         |      |        |       |         |         |         |        |        |         |         |         |         |        |         |         |         |         |       |         |         |         |        |       |         |         |  |      |     |     |     |       |       |        |         |        |       |       |       |        |         |        |       |       |       |        |        |        |       |        |       |        |         |       |       |       |      |       |        |        |       |        |         |         |         |        |        |        |         |         |          |         |       |        |         |         |          |         |       |        |         |        |        |        |       |        |      |    |     |          |          |           |                                                                                                                                                                                                                                                                                                                                                                                                                                                                                                                                                                                                                                                                                                                                                                                                                                                                                                                                                                                                                                                                                                                                                                                                                                                                                                                                                                                                                                                                                                                                                                                                                                                                                                                                                                                                                                                                                                                                                                                                                                                                                                                                                                                                                                                                                                                                                                                                                                                                                                     |  |      |    |          |                |       |       |       |         |         |       |        |       |         |         |       |        |       |         |         |       |        |       |         |         |      |        |       |         |         |         |          |        |         |         |         |        |        |         |          |         |        |        |         |         |         |       |       |         |          |  |      |     |     |     |       |       |        |         |       |        |       |       |        |        |        |        |       |       |        |        |        |         |        |       |        |         |        |        |        |      |       |        |         |         |        |         |         |          |          |        |        |         |         |         |         |         |        |         |         |         |        |         |        |         |         |         |       |        |        |      |    |     |          |          |           |
| d.1.5                                                                                                                                                                                                                                                                                                                                                                                                                                                                                                                                                                                                                                                                                                                                                                                                                                                                                                                                                                                                                                                                                                                                                                                                                                                                                                                                                                                                                                                                                                                                                                                                                                                                                                                                                                                                                                                                                                                                                                                                                                                                                                                                                                                                                                                                                                                                                                                                                                                                                | 15.209   | 55.19     | 0.12341  | 2.51334        |                |       |        |       |         |         |       |        |       |         |         |       |        |       |         |         |       |       |       |         |         |      |        |       |         |         |         |        |        |         |         |         |         |        |         |         |         |         |       |         |         |         |        |       |         |         |  |      |     |     |     |       |       |        |         |        |       |       |       |        |         |        |       |       |       |        |        |        |       |        |       |        |         |       |       |       |      |       |        |        |       |        |         |         |         |        |        |        |         |         |          |         |       |        |         |         |          |         |       |        |         |        |        |        |       |        |      |    |     |          |          |           |                                                                                                                                                                                                                                                                                                                                                                                                                                                                                                                                                                                                                                                                                                                                                                                                                                                                                                                                                                                                                                                                                                                                                                                                                                                                                                                                                                                                                                                                                                                                                                                                                                                                                                                                                                                                                                                                                                                                                                                                                                                                                                                                                                                                                                                                                                                                                                                                                                                                                                     |  |      |    |          |                |       |       |       |         |         |       |        |       |         |         |       |        |       |         |         |       |        |       |         |         |      |        |       |         |         |         |          |        |         |         |         |        |        |         |          |         |        |        |         |         |         |       |       |         |          |  |      |     |     |     |       |       |        |         |       |        |       |       |        |        |        |        |       |       |        |        |        |         |        |       |        |         |        |        |        |      |       |        |         |         |        |         |         |          |          |        |        |         |         |         |         |         |        |         |         |         |        |         |        |         |         |         |       |        |        |      |    |     |          |          |           |
| sd.d                                                                                                                                                                                                                                                                                                                                                                                                                                                                                                                                                                                                                                                                                                                                                                                                                                                                                                                                                                                                                                                                                                                                                                                                                                                                                                                                                                                                                                                                                                                                                                                                                                                                                                                                                                                                                                                                                                                                                                                                                                                                                                                                                                                                                                                                                                                                                                                                                                                                                 | 92.756   | 28.64     | 0.06404  | 0.33395        |                |       |        |       |         |         |       |        |       |         |         |       |        |       |         |         |       |       |       |         |         |      |        |       |         |         |         |        |        |         |         |         |         |        |         |         |         |         |       |         |         |         |        |       |         |         |  |      |     |     |     |       |       |        |         |        |       |       |       |        |         |        |       |       |       |        |        |        |       |        |       |        |         |       |       |       |      |       |        |        |       |        |         |         |         |        |        |        |         |         |          |         |       |        |         |         |          |         |       |        |         |        |        |        |       |        |      |    |     |          |          |           |                                                                                                                                                                                                                                                                                                                                                                                                                                                                                                                                                                                                                                                                                                                                                                                                                                                                                                                                                                                                                                                                                                                                                                                                                                                                                                                                                                                                                                                                                                                                                                                                                                                                                                                                                                                                                                                                                                                                                                                                                                                                                                                                                                                                                                                                                                                                                                                                                                                                                                     |  |      |    |          |                |       |       |       |         |         |       |        |       |         |         |       |        |       |         |         |       |        |       |         |         |      |        |       |         |         |         |          |        |         |         |         |        |        |         |          |         |        |        |         |         |         |       |       |         |          |  |      |     |     |     |       |       |        |         |       |        |       |       |        |        |        |        |       |       |        |        |        |         |        |       |        |         |        |        |        |      |       |        |         |         |        |         |         |          |          |        |        |         |         |         |         |         |        |         |         |         |        |         |        |         |         |         |       |        |        |      |    |     |          |          |           |
| beta[2]                                                                                                                                                                                                                                                                                                                                                                                                                                                                                                                                                                                                                                                                                                                                                                                                                                                                                                                                                                                                                                                                                                                                                                                                                                                                                                                                                                                                                                                                                                                                                                                                                                                                                                                                                                                                                                                                                                                                                                                                                                                                                                                                                                                                                                                                                                                                                                                                                                                                              | -134.064 | 267.77    | 0.59875  | 1.93663        |                |       |        |       |         |         |       |        |       |         |         |       |        |       |         |         |       |       |       |         |         |      |        |       |         |         |         |        |        |         |         |         |         |        |         |         |         |         |       |         |         |         |        |       |         |         |  |      |     |     |     |       |       |        |         |        |       |       |       |        |         |        |       |       |       |        |        |        |       |        |       |        |         |       |       |       |      |       |        |        |       |        |         |         |         |        |        |        |         |         |          |         |       |        |         |         |          |         |       |        |         |        |        |        |       |        |      |    |     |          |          |           |                                                                                                                                                                                                                                                                                                                                                                                                                                                                                                                                                                                                                                                                                                                                                                                                                                                                                                                                                                                                                                                                                                                                                                                                                                                                                                                                                                                                                                                                                                                                                                                                                                                                                                                                                                                                                                                                                                                                                                                                                                                                                                                                                                                                                                                                                                                                                                                                                                                                                                     |  |      |    |          |                |       |       |       |         |         |       |        |       |         |         |       |        |       |         |         |       |        |       |         |         |      |        |       |         |         |         |          |        |         |         |         |        |        |         |          |         |        |        |         |         |         |       |       |         |          |  |      |     |     |     |       |       |        |         |       |        |       |       |        |        |        |        |       |       |        |        |        |         |        |       |        |         |        |        |        |      |       |        |         |         |        |         |         |          |          |        |        |         |         |         |         |         |        |         |         |         |        |         |        |         |         |         |       |        |        |      |    |     |          |          |           |
| beta[3]                                                                                                                                                                                                                                                                                                                                                                                                                                                                                                                                                                                                                                                                                                                                                                                                                                                                                                                                                                                                                                                                                                                                                                                                                                                                                                                                                                                                                                                                                                                                                                                                                                                                                                                                                                                                                                                                                                                                                                                                                                                                                                                                                                                                                                                                                                                                                                                                                                                                              | 75.541   | 196.18    | 0.43866  | 10.31818       |                |       |        |       |         |         |       |        |       |         |         |       |        |       |         |         |       |       |       |         |         |      |        |       |         |         |         |        |        |         |         |         |         |        |         |         |         |         |       |         |         |         |        |       |         |         |  |      |     |     |     |       |       |        |         |        |       |       |       |        |         |        |       |       |       |        |        |        |       |        |       |        |         |       |       |       |      |       |        |        |       |        |         |         |         |        |        |        |         |         |          |         |       |        |         |         |          |         |       |        |         |        |        |        |       |        |      |    |     |          |          |           |                                                                                                                                                                                                                                                                                                                                                                                                                                                                                                                                                                                                                                                                                                                                                                                                                                                                                                                                                                                                                                                                                                                                                                                                                                                                                                                                                                                                                                                                                                                                                                                                                                                                                                                                                                                                                                                                                                                                                                                                                                                                                                                                                                                                                                                                                                                                                                                                                                                                                                     |  |      |    |          |                |       |       |       |         |         |       |        |       |         |         |       |        |       |         |         |       |        |       |         |         |      |        |       |         |         |         |          |        |         |         |         |        |        |         |          |         |        |        |         |         |         |       |       |         |          |  |      |     |     |     |       |       |        |         |       |        |       |       |        |        |        |        |       |       |        |        |        |         |        |       |        |         |        |        |        |      |       |        |         |         |        |         |         |          |          |        |        |         |         |         |         |         |        |         |         |         |        |         |        |         |         |         |       |        |        |      |    |     |          |          |           |
| beta[4]                                                                                                                                                                                                                                                                                                                                                                                                                                                                                                                                                                                                                                                                                                                                                                                                                                                                                                                                                                                                                                                                                                                                                                                                                                                                                                                                                                                                                                                                                                                                                                                                                                                                                                                                                                                                                                                                                                                                                                                                                                                                                                                                                                                                                                                                                                                                                                                                                                                                              | 53.412   | 111.77    | 0.24992  | 5.12928        |                |       |        |       |         |         |       |        |       |         |         |       |        |       |         |         |       |       |       |         |         |      |        |       |         |         |         |        |        |         |         |         |         |        |         |         |         |         |       |         |         |         |        |       |         |         |  |      |     |     |     |       |       |        |         |        |       |       |       |        |         |        |       |       |       |        |        |        |       |        |       |        |         |       |       |       |      |       |        |        |       |        |         |         |         |        |        |        |         |         |          |         |       |        |         |         |          |         |       |        |         |        |        |        |       |        |      |    |     |          |          |           |                                                                                                                                                                                                                                                                                                                                                                                                                                                                                                                                                                                                                                                                                                                                                                                                                                                                                                                                                                                                                                                                                                                                                                                                                                                                                                                                                                                                                                                                                                                                                                                                                                                                                                                                                                                                                                                                                                                                                                                                                                                                                                                                                                                                                                                                                                                                                                                                                                                                                                     |  |      |    |          |                |       |       |       |         |         |       |        |       |         |         |       |        |       |         |         |       |        |       |         |         |      |        |       |         |         |         |          |        |         |         |         |        |        |         |          |         |        |        |         |         |         |       |       |         |          |  |      |     |     |     |       |       |        |         |       |        |       |       |        |        |        |        |       |       |        |        |        |         |        |       |        |         |        |        |        |      |       |        |         |         |        |         |         |          |          |        |        |         |         |         |         |         |        |         |         |         |        |         |        |         |         |         |       |        |        |      |    |     |          |          |           |
| beta[5]                                                                                                                                                                                                                                                                                                                                                                                                                                                                                                                                                                                                                                                                                                                                                                                                                                                                                                                                                                                                                                                                                                                                                                                                                                                                                                                                                                                                                                                                                                                                                                                                                                                                                                                                                                                                                                                                                                                                                                                                                                                                                                                                                                                                                                                                                                                                                                                                                                                                              | 3.580    | 97.12     | 0.21717  | 27.90645       |                |       |        |       |         |         |       |        |       |         |         |       |        |       |         |         |       |       |       |         |         |      |        |       |         |         |         |        |        |         |         |         |         |        |         |         |         |         |       |         |         |         |        |       |         |         |  |      |     |     |     |       |       |        |         |        |       |       |       |        |         |        |       |       |       |        |        |        |       |        |       |        |         |       |       |       |      |       |        |        |       |        |         |         |         |        |        |        |         |         |          |         |       |        |         |         |          |         |       |        |         |        |        |        |       |        |      |    |     |          |          |           |                                                                                                                                                                                                                                                                                                                                                                                                                                                                                                                                                                                                                                                                                                                                                                                                                                                                                                                                                                                                                                                                                                                                                                                                                                                                                                                                                                                                                                                                                                                                                                                                                                                                                                                                                                                                                                                                                                                                                                                                                                                                                                                                                                                                                                                                                                                                                                                                                                                                                                     |  |      |    |          |                |       |       |       |         |         |       |        |       |         |         |       |        |       |         |         |       |        |       |         |         |      |        |       |         |         |         |          |        |         |         |         |        |        |         |          |         |        |        |         |         |         |       |       |         |          |  |      |     |     |     |       |       |        |         |       |        |       |       |        |        |        |        |       |       |        |        |        |         |        |       |        |         |        |        |        |      |       |        |         |         |        |         |         |          |          |        |        |         |         |         |         |         |        |         |         |         |        |         |        |         |         |         |       |        |        |      |    |     |          |          |           |
|                                                                                                                                                                                                                                                                                                                                                                                                                                                                                                                                                                                                                                                                                                                                                                                                                                                                                                                                                                                                                                                                                                                                                                                                                                                                                                                                                                                                                                                                                                                                                                                                                                                                                                                                                                                                                                                                                                                                                                                                                                                                                                                                                                                                                                                                                                                                                                                                                                                                                      | 2.5%     | 25%       | 50%      | 75%            | 97.5%          |       |        |       |         |         |       |        |       |         |         |       |        |       |         |         |       |       |       |         |         |      |        |       |         |         |         |        |        |         |         |         |         |        |         |         |         |         |       |         |         |         |        |       |         |         |  |      |     |     |     |       |       |        |         |        |       |       |       |        |         |        |       |       |       |        |        |        |       |        |       |        |         |       |       |       |      |       |        |        |       |        |         |         |         |        |        |        |         |         |          |         |       |        |         |         |          |         |       |        |         |        |        |        |       |        |      |    |     |          |          |           |                                                                                                                                                                                                                                                                                                                                                                                                                                                                                                                                                                                                                                                                                                                                                                                                                                                                                                                                                                                                                                                                                                                                                                                                                                                                                                                                                                                                                                                                                                                                                                                                                                                                                                                                                                                                                                                                                                                                                                                                                                                                                                                                                                                                                                                                                                                                                                                                                                                                                                     |  |      |    |          |                |       |       |       |         |         |       |        |       |         |         |       |        |       |         |         |       |        |       |         |         |      |        |       |         |         |         |          |        |         |         |         |        |        |         |          |         |        |        |         |         |         |       |       |         |          |  |      |     |     |     |       |       |        |         |       |        |       |       |        |        |        |        |       |       |        |        |        |         |        |       |        |         |        |        |        |      |       |        |         |         |        |         |         |          |          |        |        |         |         |         |         |         |        |         |         |         |        |         |        |         |         |         |       |        |        |      |    |     |          |          |           |
| d.1.2                                                                                                                                                                                                                                                                                                                                                                                                                                                                                                                                                                                                                                                                                                                                                                                                                                                                                                                                                                                                                                                                                                                                                                                                                                                                                                                                                                                                                                                                                                                                                                                                                                                                                                                                                                                                                                                                                                                                                                                                                                                                                                                                                                                                                                                                                                                                                                                                                                                                                | -61.63   | -15.889   | 3.581    | 21.574         | 69.81          |       |        |       |         |         |       |        |       |         |         |       |        |       |         |         |       |       |       |         |         |      |        |       |         |         |         |        |        |         |         |         |         |        |         |         |         |         |       |         |         |         |        |       |         |         |  |      |     |     |     |       |       |        |         |        |       |       |       |        |         |        |       |       |       |        |        |        |       |        |       |        |         |       |       |       |      |       |        |        |       |        |         |         |         |        |        |        |         |         |          |         |       |        |         |         |          |         |       |        |         |        |        |        |       |        |      |    |     |          |          |           |                                                                                                                                                                                                                                                                                                                                                                                                                                                                                                                                                                                                                                                                                                                                                                                                                                                                                                                                                                                                                                                                                                                                                                                                                                                                                                                                                                                                                                                                                                                                                                                                                                                                                                                                                                                                                                                                                                                                                                                                                                                                                                                                                                                                                                                                                                                                                                                                                                                                                                     |  |      |    |          |                |       |       |       |         |         |       |        |       |         |         |       |        |       |         |         |       |        |       |         |         |      |        |       |         |         |         |          |        |         |         |         |        |        |         |          |         |        |        |         |         |         |       |       |         |          |  |      |     |     |     |       |       |        |         |       |        |       |       |        |        |        |        |       |       |        |        |        |         |        |       |        |         |        |        |        |      |       |        |         |         |        |         |         |          |          |        |        |         |         |         |         |         |        |         |         |         |        |         |        |         |         |         |       |        |        |      |    |     |          |          |           |
| d.1.3                                                                                                                                                                                                                                                                                                                                                                                                                                                                                                                                                                                                                                                                                                                                                                                                                                                                                                                                                                                                                                                                                                                                                                                                                                                                                                                                                                                                                                                                                                                                                                                                                                                                                                                                                                                                                                                                                                                                                                                                                                                                                                                                                                                                                                                                                                                                                                                                                                                                                | -48.36   | -6.985    | 10.090   | 27.180         | 72.30          |       |        |       |         |         |       |        |       |         |         |       |        |       |         |         |       |       |       |         |         |      |        |       |         |         |         |        |        |         |         |         |         |        |         |         |         |         |       |         |         |         |        |       |         |         |  |      |     |     |     |       |       |        |         |        |       |       |       |        |         |        |       |       |       |        |        |        |       |        |       |        |         |       |       |       |      |       |        |        |       |        |         |         |         |        |        |        |         |         |          |         |       |        |         |         |          |         |       |        |         |        |        |        |       |        |      |    |     |          |          |           |                                                                                                                                                                                                                                                                                                                                                                                                                                                                                                                                                                                                                                                                                                                                                                                                                                                                                                                                                                                                                                                                                                                                                                                                                                                                                                                                                                                                                                                                                                                                                                                                                                                                                                                                                                                                                                                                                                                                                                                                                                                                                                                                                                                                                                                                                                                                                                                                                                                                                                     |  |      |    |          |                |       |       |       |         |         |       |        |       |         |         |       |        |       |         |         |       |        |       |         |         |      |        |       |         |         |         |          |        |         |         |         |        |        |         |          |         |        |        |         |         |         |       |       |         |          |  |      |     |     |     |       |       |        |         |       |        |       |       |        |        |        |        |       |       |        |        |        |         |        |       |        |         |        |        |        |      |       |        |         |         |        |         |         |          |          |        |        |         |         |         |         |         |        |         |         |         |        |         |        |         |         |         |       |        |        |      |    |     |          |          |           |
| d.1.4                                                                                                                                                                                                                                                                                                                                                                                                                                                                                                                                                                                                                                                                                                                                                                                                                                                                                                                                                                                                                                                                                                                                                                                                                                                                                                                                                                                                                                                                                                                                                                                                                                                                                                                                                                                                                                                                                                                                                                                                                                                                                                                                                                                                                                                                                                                                                                                                                                                                                | -62.75   | 24.472    | 63.320   | 102.297        | 190.20         |       |        |       |         |         |       |        |       |         |         |       |        |       |         |         |       |       |       |         |         |      |        |       |         |         |         |        |        |         |         |         |         |        |         |         |         |         |       |         |         |         |        |       |         |         |  |      |     |     |     |       |       |        |         |        |       |       |       |        |         |        |       |       |       |        |        |        |       |        |       |        |         |       |       |       |      |       |        |        |       |        |         |         |         |        |        |        |         |         |          |         |       |        |         |         |          |         |       |        |         |        |        |        |       |        |      |    |     |          |          |           |                                                                                                                                                                                                                                                                                                                                                                                                                                                                                                                                                                                                                                                                                                                                                                                                                                                                                                                                                                                                                                                                                                                                                                                                                                                                                                                                                                                                                                                                                                                                                                                                                                                                                                                                                                                                                                                                                                                                                                                                                                                                                                                                                                                                                                                                                                                                                                                                                                                                                                     |  |      |    |          |                |       |       |       |         |         |       |        |       |         |         |       |        |       |         |         |       |        |       |         |         |      |        |       |         |         |         |          |        |         |         |         |        |        |         |          |         |        |        |         |         |         |       |       |         |          |  |      |     |     |     |       |       |        |         |       |        |       |       |        |        |        |        |       |       |        |        |        |         |        |       |        |         |        |        |        |      |       |        |         |         |        |         |         |          |          |        |        |         |         |         |         |         |        |         |         |         |        |         |        |         |         |         |       |        |        |      |    |     |          |          |           |
| d.1.5                                                                                                                                                                                                                                                                                                                                                                                                                                                                                                                                                                                                                                                                                                                                                                                                                                                                                                                                                                                                                                                                                                                                                                                                                                                                                                                                                                                                                                                                                                                                                                                                                                                                                                                                                                                                                                                                                                                                                                                                                                                                                                                                                                                                                                                                                                                                                                                                                                                                                | -96.90   | -17.612   | 15.501   | 47.220         | 130.31         |       |        |       |         |         |       |        |       |         |         |       |        |       |         |         |       |       |       |         |         |      |        |       |         |         |         |        |        |         |         |         |         |        |         |         |         |         |       |         |         |         |        |       |         |         |  |      |     |     |     |       |       |        |         |        |       |       |       |        |         |        |       |       |       |        |        |        |       |        |       |        |         |       |       |       |      |       |        |        |       |        |         |         |         |        |        |        |         |         |          |         |       |        |         |         |          |         |       |        |         |        |        |        |       |        |      |    |     |          |          |           |                                                                                                                                                                                                                                                                                                                                                                                                                                                                                                                                                                                                                                                                                                                                                                                                                                                                                                                                                                                                                                                                                                                                                                                                                                                                                                                                                                                                                                                                                                                                                                                                                                                                                                                                                                                                                                                                                                                                                                                                                                                                                                                                                                                                                                                                                                                                                                                                                                                                                                     |  |      |    |          |                |       |       |       |         |         |       |        |       |         |         |       |        |       |         |         |       |        |       |         |         |      |        |       |         |         |         |          |        |         |         |         |        |        |         |          |         |        |        |         |         |         |       |       |         |          |  |      |     |     |     |       |       |        |         |       |        |       |       |        |        |        |        |       |       |        |        |        |         |        |       |        |         |        |        |        |      |       |        |         |         |        |         |         |          |          |        |        |         |         |         |         |         |        |         |         |         |        |         |        |         |         |         |       |        |        |      |    |     |          |          |           |
| sd.d                                                                                                                                                                                                                                                                                                                                                                                                                                                                                                                                                                                                                                                                                                                                                                                                                                                                                                                                                                                                                                                                                                                                                                                                                                                                                                                                                                                                                                                                                                                                                                                                                                                                                                                                                                                                                                                                                                                                                                                                                                                                                                                                                                                                                                                                                                                                                                                                                                                                                 | 33.73    | 76.440    | 107.970  | 114.201        | 116.78         |       |        |       |         |         |       |        |       |         |         |       |        |       |         |         |       |       |       |         |         |      |        |       |         |         |         |        |        |         |         |         |         |        |         |         |         |         |       |         |         |         |        |       |         |         |  |      |     |     |     |       |       |        |         |        |       |       |       |        |         |        |       |       |       |        |        |        |       |        |       |        |         |       |       |       |      |       |        |        |       |        |         |         |         |        |        |        |         |         |          |         |       |        |         |         |          |         |       |        |         |        |        |        |       |        |      |    |     |          |          |           |                                                                                                                                                                                                                                                                                                                                                                                                                                                                                                                                                                                                                                                                                                                                                                                                                                                                                                                                                                                                                                                                                                                                                                                                                                                                                                                                                                                                                                                                                                                                                                                                                                                                                                                                                                                                                                                                                                                                                                                                                                                                                                                                                                                                                                                                                                                                                                                                                                                                                                     |  |      |    |          |                |       |       |       |         |         |       |        |       |         |         |       |        |       |         |         |       |        |       |         |         |      |        |       |         |         |         |          |        |         |         |         |        |        |         |          |         |        |        |         |         |         |       |       |         |          |  |      |     |     |     |       |       |        |         |       |        |       |       |        |        |        |        |       |       |        |        |        |         |        |       |        |         |        |        |        |      |       |        |         |         |        |         |         |          |          |        |        |         |         |         |         |         |        |         |         |         |        |         |        |         |         |         |       |        |        |      |    |     |          |          |           |
| beta[2]                                                                                                                                                                                                                                                                                                                                                                                                                                                                                                                                                                                                                                                                                                                                                                                                                                                                                                                                                                                                                                                                                                                                                                                                                                                                                                                                                                                                                                                                                                                                                                                                                                                                                                                                                                                                                                                                                                                                                                                                                                                                                                                                                                                                                                                                                                                                                                                                                                                                              | -411.45  | -335.930  | -211.048 | -6.783         | 304.15         |       |        |       |         |         |       |        |       |         |         |       |        |       |         |         |       |       |       |         |         |      |        |       |         |         |         |        |        |         |         |         |         |        |         |         |         |         |       |         |         |         |        |       |         |         |  |      |     |     |     |       |       |        |         |        |       |       |       |        |         |        |       |       |       |        |        |        |       |        |       |        |         |       |       |       |      |       |        |        |       |        |         |         |         |        |        |        |         |         |          |         |       |        |         |         |          |         |       |        |         |        |        |        |       |        |      |    |     |          |          |           |                                                                                                                                                                                                                                                                                                                                                                                                                                                                                                                                                                                                                                                                                                                                                                                                                                                                                                                                                                                                                                                                                                                                                                                                                                                                                                                                                                                                                                                                                                                                                                                                                                                                                                                                                                                                                                                                                                                                                                                                                                                                                                                                                                                                                                                                                                                                                                                                                                                                                                     |  |      |    |          |                |       |       |       |         |         |       |        |       |         |         |       |        |       |         |         |       |        |       |         |         |      |        |       |         |         |         |          |        |         |         |         |        |        |         |          |         |        |        |         |         |         |       |       |         |          |  |      |     |     |     |       |       |        |         |       |        |       |       |        |        |        |        |       |       |        |        |        |         |        |       |        |         |        |        |        |      |       |        |         |         |        |         |         |          |          |        |        |         |         |         |         |         |        |         |         |         |        |         |        |         |         |         |       |        |        |      |    |     |          |          |           |
| beta[3]                                                                                                                                                                                                                                                                                                                                                                                                                                                                                                                                                                                                                                                                                                                                                                                                                                                                                                                                                                                                                                                                                                                                                                                                                                                                                                                                                                                                                                                                                                                                                                                                                                                                                                                                                                                                                                                                                                                                                                                                                                                                                                                                                                                                                                                                                                                                                                                                                                                                              | -246.20  | -32.453   | 100.148  | 174.012        | 373.85         |       |        |       |         |         |       |        |       |         |         |       |        |       |         |         |       |       |       |         |         |      |        |       |         |         |         |        |        |         |         |         |         |        |         |         |         |         |       |         |         |         |        |       |         |         |  |      |     |     |     |       |       |        |         |        |       |       |       |        |         |        |       |       |       |        |        |        |       |        |       |        |         |       |       |       |      |       |        |        |       |        |         |         |         |        |        |        |         |         |          |         |       |        |         |         |          |         |       |        |         |        |        |        |       |        |      |    |     |          |          |           |                                                                                                                                                                                                                                                                                                                                                                                                                                                                                                                                                                                                                                                                                                                                                                                                                                                                                                                                                                                                                                                                                                                                                                                                                                                                                                                                                                                                                                                                                                                                                                                                                                                                                                                                                                                                                                                                                                                                                                                                                                                                                                                                                                                                                                                                                                                                                                                                                                                                                                     |  |      |    |          |                |       |       |       |         |         |       |        |       |         |         |       |        |       |         |         |       |        |       |         |         |      |        |       |         |         |         |          |        |         |         |         |        |        |         |          |         |        |        |         |         |         |       |       |         |          |  |      |     |     |     |       |       |        |         |       |        |       |       |        |        |        |        |       |       |        |        |        |         |        |       |        |         |        |        |        |      |       |        |         |         |        |         |         |          |          |        |        |         |         |         |         |         |        |         |         |         |        |         |        |         |         |         |       |        |        |      |    |     |          |          |           |
| beta[4]                                                                                                                                                                                                                                                                                                                                                                                                                                                                                                                                                                                                                                                                                                                                                                                                                                                                                                                                                                                                                                                                                                                                                                                                                                                                                                                                                                                                                                                                                                                                                                                                                                                                                                                                                                                                                                                                                                                                                                                                                                                                                                                                                                                                                                                                                                                                                                                                                                                                              | -162.82  | -14.318   | 49.465   | 117.996        | 284.31         |       |        |       |         |         |       |        |       |         |         |       |        |       |         |         |       |       |       |         |         |      |        |       |         |         |         |        |        |         |         |         |         |        |         |         |         |         |       |         |         |         |        |       |         |         |  |      |     |     |     |       |       |        |         |        |       |       |       |        |         |        |       |       |       |        |        |        |       |        |       |        |         |       |       |       |      |       |        |        |       |        |         |         |         |        |        |        |         |         |          |         |       |        |         |         |          |         |       |        |         |        |        |        |       |        |      |    |     |          |          |           |                                                                                                                                                                                                                                                                                                                                                                                                                                                                                                                                                                                                                                                                                                                                                                                                                                                                                                                                                                                                                                                                                                                                                                                                                                                                                                                                                                                                                                                                                                                                                                                                                                                                                                                                                                                                                                                                                                                                                                                                                                                                                                                                                                                                                                                                                                                                                                                                                                                                                                     |  |      |    |          |                |       |       |       |         |         |       |        |       |         |         |       |        |       |         |         |       |        |       |         |         |      |        |       |         |         |         |          |        |         |         |         |        |        |         |          |         |        |        |         |         |         |       |       |         |          |  |      |     |     |     |       |       |        |         |       |        |       |       |        |        |        |        |       |       |        |        |        |         |        |       |        |         |        |        |        |      |       |        |         |         |        |         |         |          |          |        |        |         |         |         |         |         |        |         |         |         |        |         |        |         |         |         |       |        |        |      |    |     |          |          |           |
| beta[5]                                                                                                                                                                                                                                                                                                                                                                                                                                                                                                                                                                                                                                                                                                                                                                                                                                                                                                                                                                                                                                                                                                                                                                                                                                                                                                                                                                                                                                                                                                                                                                                                                                                                                                                                                                                                                                                                                                                                                                                                                                                                                                                                                                                                                                                                                                                                                                                                                                                                              | -191.80  | -55.466   | 2.781    | 50.791         | 234.38         |       |        |       |         |         |       |        |       |         |         |       |        |       |         |         |       |       |       |         |         |      |        |       |         |         |         |        |        |         |         |         |         |        |         |         |         |         |       |         |         |         |        |       |         |         |  |      |     |     |     |       |       |        |         |        |       |       |       |        |         |        |       |       |       |        |        |        |       |        |       |        |         |       |       |       |      |       |        |        |       |        |         |         |         |        |        |        |         |         |          |         |       |        |         |         |          |         |       |        |         |        |        |        |       |        |      |    |     |          |          |           |                                                                                                                                                                                                                                                                                                                                                                                                                                                                                                                                                                                                                                                                                                                                                                                                                                                                                                                                                                                                                                                                                                                                                                                                                                                                                                                                                                                                                                                                                                                                                                                                                                                                                                                                                                                                                                                                                                                                                                                                                                                                                                                                                                                                                                                                                                                                                                                                                                                                                                     |  |      |    |          |                |       |       |       |         |         |       |        |       |         |         |       |        |       |         |         |       |        |       |         |         |      |        |       |         |         |         |          |        |         |         |         |        |        |         |          |         |        |        |         |         |         |       |       |         |          |  |      |     |     |     |       |       |        |         |       |        |       |       |        |        |        |        |       |       |        |        |        |         |        |       |        |         |        |        |        |      |       |        |         |         |        |         |         |          |          |        |        |         |         |         |         |         |        |         |         |         |        |         |        |         |         |         |       |        |        |      |    |     |          |          |           |
| Dbar                                                                                                                                                                                                                                                                                                                                                                                                                                                                                                                                                                                                                                                                                                                                                                                                                                                                                                                                                                                                                                                                                                                                                                                                                                                                                                                                                                                                                                                                                                                                                                                                                                                                                                                                                                                                                                                                                                                                                                                                                                                                                                                                                                                                                                                                                                                                                                                                                                                                                 | pD       | DIC       |          |                |                |       |        |       |         |         |       |        |       |         |         |       |        |       |         |         |       |       |       |         |         |      |        |       |         |         |         |        |        |         |         |         |         |        |         |         |         |         |       |         |         |         |        |       |         |         |  |      |     |     |     |       |       |        |         |        |       |       |       |        |         |        |       |       |       |        |        |        |       |        |       |        |         |       |       |       |      |       |        |        |       |        |         |         |         |        |        |        |         |         |          |         |       |        |         |         |          |         |       |        |         |        |        |        |       |        |      |    |     |          |          |           |                                                                                                                                                                                                                                                                                                                                                                                                                                                                                                                                                                                                                                                                                                                                                                                                                                                                                                                                                                                                                                                                                                                                                                                                                                                                                                                                                                                                                                                                                                                                                                                                                                                                                                                                                                                                                                                                                                                                                                                                                                                                                                                                                                                                                                                                                                                                                                                                                                                                                                     |  |      |    |          |                |       |       |       |         |         |       |        |       |         |         |       |        |       |         |         |       |        |       |         |         |      |        |       |         |         |         |          |        |         |         |         |        |        |         |          |         |        |        |         |         |         |       |       |         |          |  |      |     |     |     |       |       |        |         |       |        |       |       |        |        |        |        |       |       |        |        |        |         |        |       |        |         |        |        |        |      |       |        |         |         |        |         |         |          |          |        |        |         |         |         |         |         |        |         |         |         |        |         |        |         |         |         |       |        |        |      |    |     |          |          |           |
| 60.12699                                                                                                                                                                                                                                                                                                                                                                                                                                                                                                                                                                                                                                                                                                                                                                                                                                                                                                                                                                                                                                                                                                                                                                                                                                                                                                                                                                                                                                                                                                                                                                                                                                                                                                                                                                                                                                                                                                                                                                                                                                                                                                                                                                                                                                                                                                                                                                                                                                                                             | 59.88563 | 120.01263 |          |                |                |       |        |       |         |         |       |        |       |         |         |       |        |       |         |         |       |       |       |         |         |      |        |       |         |         |         |        |        |         |         |         |         |        |         |         |         |         |       |         |         |         |        |       |         |         |  |      |     |     |     |       |       |        |         |        |       |       |       |        |         |        |       |       |       |        |        |        |       |        |       |        |         |       |       |       |      |       |        |        |       |        |         |         |         |        |        |        |         |         |          |         |       |        |         |         |          |         |       |        |         |        |        |        |       |        |      |    |     |          |          |           |                                                                                                                                                                                                                                                                                                                                                                                                                                                                                                                                                                                                                                                                                                                                                                                                                                                                                                                                                                                                                                                                                                                                                                                                                                                                                                                                                                                                                                                                                                                                                                                                                                                                                                                                                                                                                                                                                                                                                                                                                                                                                                                                                                                                                                                                                                                                                                                                                                                                                                     |  |      |    |          |                |       |       |       |         |         |       |        |       |         |         |       |        |       |         |         |       |        |       |         |         |      |        |       |         |         |         |          |        |         |         |         |        |        |         |          |         |        |        |         |         |         |       |       |         |          |  |      |     |     |     |       |       |        |         |       |        |       |       |        |        |        |        |       |       |        |        |        |         |        |       |        |         |        |        |        |      |       |        |         |         |        |         |         |          |          |        |        |         |         |         |         |         |        |         |         |         |        |         |        |         |         |         |       |        |        |      |    |     |          |          |           |

### Frequency

1. Empirical mean and standard deviation for each variable, plus standard error of the mean:

|         | Mean     | SD     | Naive SE | Time-series SE |
|---------|----------|--------|----------|----------------|
| d.1.2   | -2.721   | 41.73  | 0.09330  | 0.07622        |
| d.1.3   | -2.024   | 27.14  | 0.06068  | 0.05953        |
| d.1.4   | 40.738   | 59.56  | 0.13317  | 0.42610        |
| d.1.5   | -10.005  | 62.37  | 0.13946  | 1.78242        |
| sd.d    | 89.197   | 33.67  | 0.07530  | 0.06562        |
| beta[2] | 5.699    | 318.68 | 0.71259  | 1.77069        |
| beta[3] | -170.018 | 110.94 | 0.24807  | 3.23154        |
| beta[4] | -58.316  | 100.38 | 0.22445  | 1.96895        |
| beta[5] | 94.306   | 160.01 | 0.35778  | 29.53184       |

2. Quantiles for each variable:

|         | 2.5%    | 25%      | 50%      | 75%      | 97.5%  |
|---------|---------|----------|----------|----------|--------|
| d.1.2   | -98.35  | -25.333  | 5.762    | 22.180   | 70.03  |
| d.1.3   | -60.51  | -18.640  | 1.577    | 14.638   | 49.71  |
| d.1.4   | -80.66  | 6.786    | 38.519   | 74.573   | 166.15 |
| d.1.5   | -151.59 | -48.583  | 2.016    | 33.756   | 90.75  |
| sd.d    | 25.62   | 67.176   | 106.098  | 114.188  | 116.81 |
| beta[2] | -301.75 | -184.538 | -111.585 | 87.320   | 543.93 |
| beta[3] | -292.94 | -242.965 | -203.325 | -122.932 | 18.37  |
| beta[4] | -271.10 | -116.669 | -55.308  | 3.941    | 135.93 |
| beta[5] | -141.73 | -21.680  | 52.870   | 184.445  | 453.49 |

-- Model fit (residual deviance):

| Dbar     | pD       | DIC       |
|----------|----------|-----------|
| 59.32767 | 59.26679 | 118.59446 |

60 data points, ratio 0.9888, I<sup>2</sup> = 0.6%

### Duration

### Intensity

1. Empirical mean and standard deviation for each variable, plus standard error of the mean:

|         | Mean     | SD      | Naive SE | Time-series SE |
|---------|----------|---------|----------|----------------|
| d.1.2   | 4.142    | 15.081  | 0.03372  | 0.1324         |
| d.1.3   | -37.369  | 17.006  | 0.03803  | 0.1546         |
| d.1.4   | 31.759   | 31.463  | 0.07035  | 0.1480         |
| d.1.5   | 14.099   | 22.664  | 0.05068  | 0.3777         |
| sd.d    | 44.525   | 9.132   | 0.02042  | 0.1091         |
| beta[2] | -210.405 | 153.631 | 0.34353  | 4.9610         |
| beta[3] | -276.574 | 70.211  | 0.15700  | 6.5498         |
| beta[4] | -126.473 | 155.298 | 0.34726  | 1.5388         |
| beta[5] | -202.883 | 152.215 | 0.34036  | 1.4528         |

2. Quantiles for each variable:

|         | 2.5%    | 25%       | 50%      | 75%     | 97.5%    |
|---------|---------|-----------|----------|---------|----------|
| d.1.2   | -25.70  | -5.6254   | 4.112    | 13.82   | 34.287   |
| d.1.3   | -74.11  | -47.9211  | -36.045  | -25.53  | -7.227   |
| d.1.4   | -29.45  | 11.1038   | 31.356   | 52.05   | 95.110   |
| d.1.5   | -30.69  | -0.4763   | 14.030   | 28.55   | 59.342   |
| sd.d    | 29.94   | 37.8359   | 43.479   | 50.08   | 64.947   |
| beta[2] | -426.93 | -343.7890 | -212.081 | -86.22  | 11.372   |
| beta[3] | -404.87 | -318.6580 | -266.985 | -215.57 | -171.765 |
| beta[4] | -488.60 | -213.9582 | -101.443 | -19.37  | 122.065  |
| beta[5] | -424.53 | -339.7806 | -211.227 | -60.94  | 27.259   |

-- Model fit (residual deviance):

| Dbar     | pD       | DIC       |
|----------|----------|-----------|
| 59.29099 | 58.70358 | 117.99458 |

60 data points, ratio 0.9882, I<sup>2</sup> = 0.5%

### Length

## S10. GRADE assessment for executive functions

Table S7 Summary of GRADE assessment for the certainty in executive functions

| Comparisons                               | Nature of evidence | Certainty | Reason for downgrading     |
|-------------------------------------------|--------------------|-----------|----------------------------|
| Open-skill sports vs. closed-skill sports | Indirect           | Very low  | Imprecision, indirectness  |
| Open-skill sports vs. multicomponent      | Mixed              | Very low  | Imprecision, inconsistency |
| Open-skill sports vs. exergaming          | Mixed              | Moderate  | Risk of bias               |
| Open-skill sports vs. control             | Mixed              | High      | No downgrade               |
| Closed-skill sports vs. multicomponent    | Mixed              | Low       | Imprecision                |
| Closed-skill sports vs. exergaming        | Indirect           | Low       | Imprecision, indirectness  |
| Closed-skill sports vs. control           | Mixed              | Moderate  | Risk of bias               |
| Multicomponent vs. exergaming             | Indirect           | Low       | Imprecision, risk of bias  |
| Multicomponent vs. control                | Mixed              | Moderate  | Risk of bias               |
| Exergaming vs. control                    | Mixed              | Low       | Imprecision, risk of bias  |

## S11. Analysis for hyperactivity/impulsivity

Figure S18 Loop-specific heterogeneity for hyperactivity/impulsivity

| Loop  | IF    | seIF  | z_value | p_value | CI_95         | Loop_Heterog_tau2 |
|-------|-------|-------|---------|---------|---------------|-------------------|
| A-B-F | 1.312 | 5.464 | 0.240   | 0.810   | (0.00, 12.02) | 4.098             |

Inconsistency plot for the hyperactivity/impulsivity, assuming loop-specific heterogeneity estimates.

Figure S19 The ranking of effects for hyperactivity/impulsivity

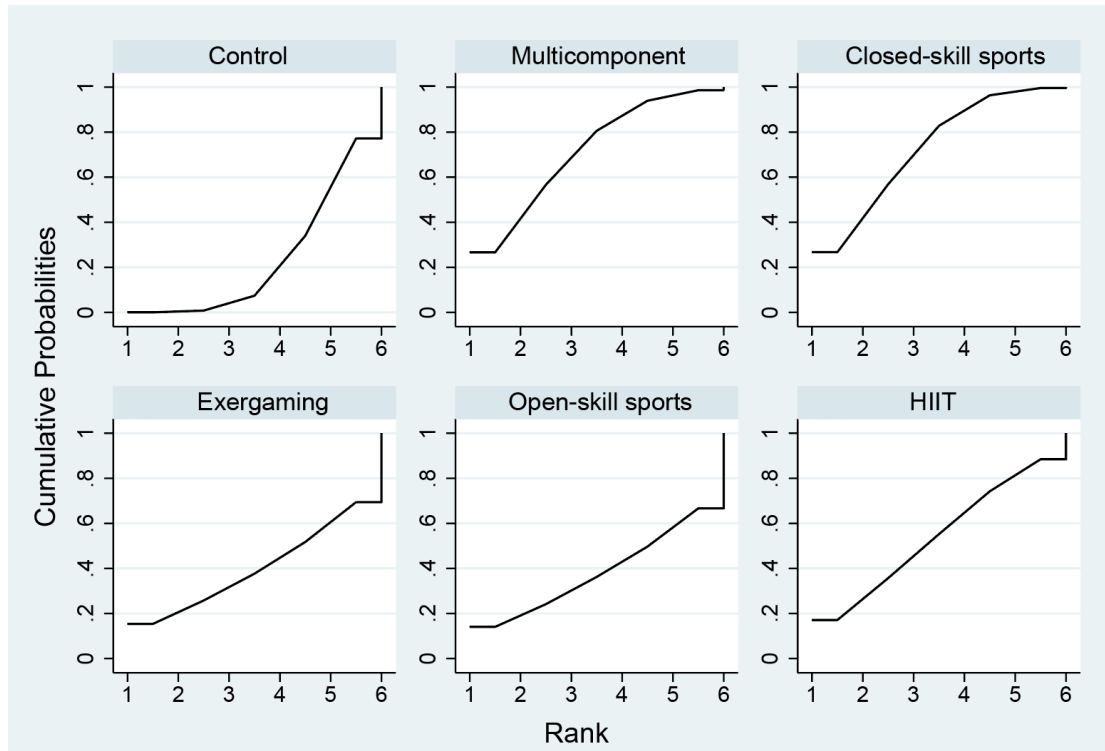

Plots of the surface under the cumulative ranking curves (SUCRA) for all comparisons in the hyperactivity/impulsivity network.

## S12. Analysis for inattention

Figure S20 Loop-specific heterogeneity for inattention

| Loop  | IF    | seIF  | z_value | p_value | CI_95        | Loop_Heterog_tau2 |
|-------|-------|-------|---------|---------|--------------|-------------------|
| A-B-F | 0.358 | 0.512 | 0.700   | 0.484   | (0.00, 1.36) | 0.000             |

Inconsistency plot for the inattention, assuming loop-specific heterogeneity estimates.

Figure S21 The ranking of effects for inattention

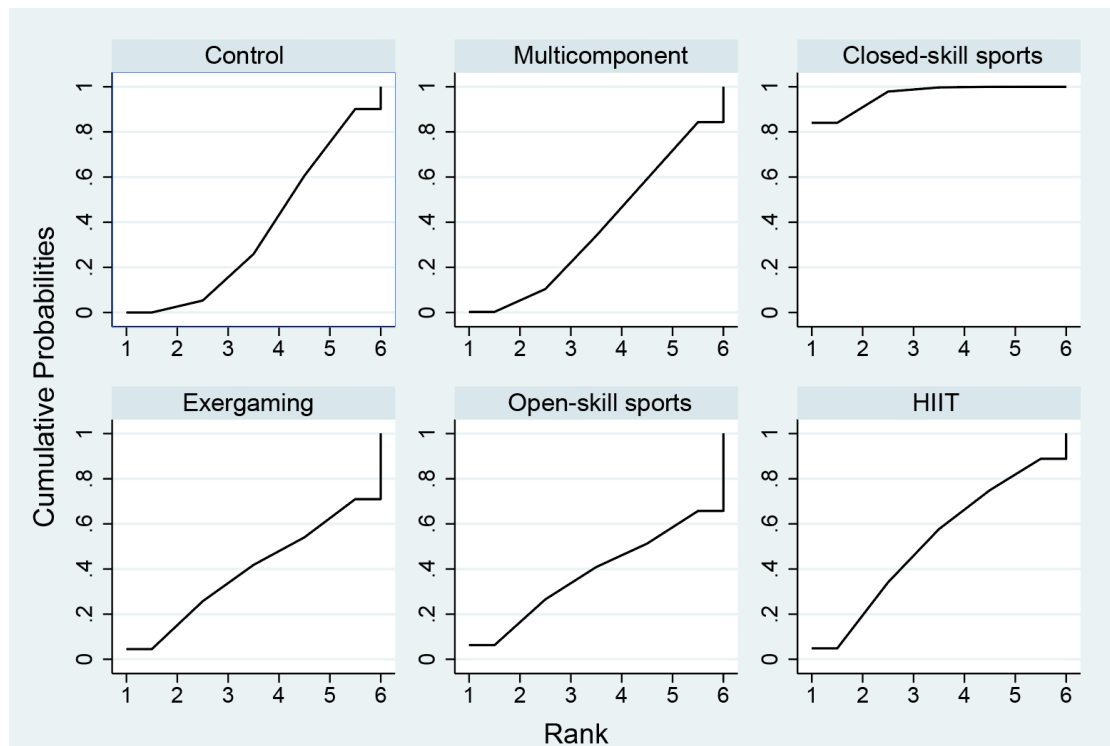

Plots of the surface under the cumulative ranking curves (SUCRA) for all comparisons in the inattention network.

S13. Publication bias assessed with funnel plots for major symptoms

Figure S22 Comparison-adjusted funnel plot for the hyperactivity/impulsivity network

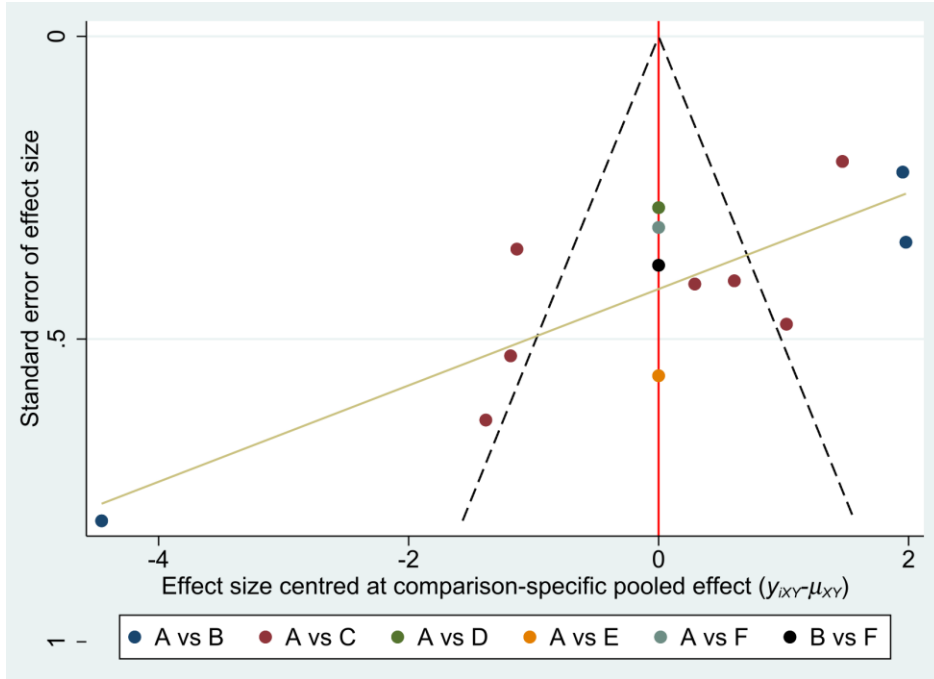

Figure S23 Comparison-adjusted funnel plot for the inattention network

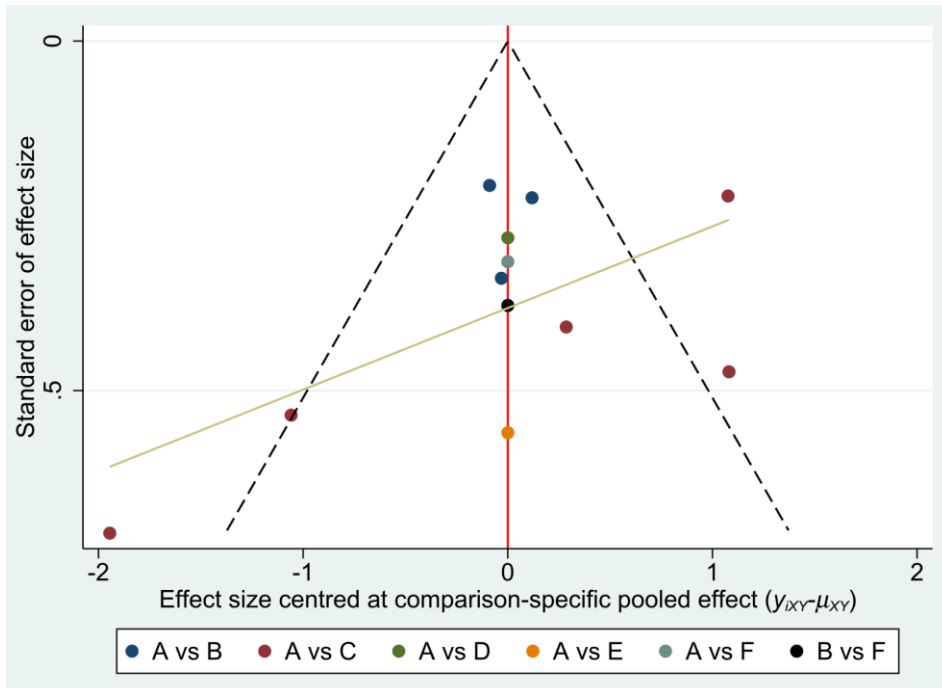



## S14. Meta-regression analyses for major symptoms

Figure S24 The results of meta-regression analyses for hyperactivity/impulsivity

| <p>1. Empirical mean and standard deviation for each variable, plus standard error of the mean:</p> <table border="0"> <thead> <tr> <th></th> <th>Mean</th> <th>SD</th> <th>Naive SE</th> <th>Time-series SE</th> </tr> </thead> <tbody> <tr><td>d.1.2</td><td>-0.5812</td><td>3.085</td><td>0.006899</td><td>0.021236</td></tr> <tr><td>d.1.3</td><td>-5.4553</td><td>2.195</td><td>0.004908</td><td>0.006217</td></tr> <tr><td>d.1.4</td><td>-1.5094</td><td>6.531</td><td>0.014604</td><td>0.103103</td></tr> <tr><td>d.1.5</td><td>-2.9040</td><td>26.179</td><td>0.058538</td><td>0.995287</td></tr> <tr><td>d.1.6</td><td>-1.6540</td><td>4.881</td><td>0.010915</td><td>0.084347</td></tr> <tr><td>sd.d</td><td>5.1460</td><td>1.867</td><td>0.004174</td><td>0.026200</td></tr> <tr><td>beta[2]</td><td>1.2361</td><td>6.488</td><td>0.014509</td><td>1.132292</td></tr> <tr><td>beta[3]</td><td>6.4383</td><td>3.392</td><td>0.007585</td><td>0.576225</td></tr> <tr><td>beta[4]</td><td>-0.7476</td><td>139.261</td><td>0.311397</td><td>4.799500</td></tr> <tr><td>beta[5]</td><td>1.7722</td><td>81.373</td><td>0.181955</td><td>3.398466</td></tr> <tr><td>beta[6]</td><td>-8.4963</td><td>93.248</td><td>0.208509</td><td>4.991421</td></tr> </tbody> </table> <p>2. Quantiles for each variable:</p> <table border="0"> <thead> <tr> <th></th> <th>2.5%</th> <th>25%</th> <th>50%</th> <th>75%</th> <th>97.5%</th> </tr> </thead> <tbody> <tr><td>d.1.2</td><td>-6.8293</td><td>-2.399</td><td>-0.56917</td><td>1.249</td><td>5.617</td></tr> <tr><td>d.1.3</td><td>-9.9394</td><td>-6.754</td><td>-5.41262</td><td>-4.132</td><td>-1.125</td></tr> <tr><td>d.1.4</td><td>-14.2462</td><td>-5.172</td><td>-1.52422</td><td>2.129</td><td>11.613</td></tr> <tr><td>d.1.5</td><td>-52.2607</td><td>-12.981</td><td>-3.38063</td><td>6.152</td><td>55.786</td></tr> <tr><td>d.1.6</td><td>-11.4081</td><td>-4.590</td><td>-1.69322</td><td>1.217</td><td>8.459</td></tr> <tr><td>sd.d</td><td>2.5541</td><td>3.845</td><td>4.79175</td><td>6.054</td><td>9.786</td></tr> <tr><td>beta[2]</td><td>-9.5725</td><td>-3.685</td><td>0.75760</td><td>5.165</td><td>15.634</td></tr> <tr><td>beta[3]</td><td>0.6883</td><td>4.027</td><td>6.09224</td><td>8.475</td><td>14.021</td></tr> <tr><td>beta[4]</td><td>-228.5349</td><td>-19.038</td><td>-0.11935</td><td>18.566</td><td>212.332</td></tr> <tr><td>beta[5]</td><td>-154.3489</td><td>-17.769</td><td>0.04431</td><td>17.965</td><td>191.149</td></tr> <tr><td>beta[6]</td><td>-267.7240</td><td>-21.814</td><td>-1.17367</td><td>17.775</td><td>170.818</td></tr> </tbody> </table> <p>-- Model fit (residual deviance):</p> <table border="0"> <thead> <tr> <th>Dbar</th> <th>pD</th> <th>DIC</th> </tr> </thead> <tbody> <tr> <td>28.25290</td> <td>27.27184</td> <td>55.52474</td> </tr> </tbody> </table> <p>28 data points, ratio 1.009, I<sup>2</sup> = 4%</p> |           | Mean     | SD       | Naive SE       | Time-series SE | d.1.2 | -0.5812 | 3.085 | 0.006899 | 0.021236 | d.1.3 | -5.4553 | 2.195 | 0.004908 | 0.006217 | d.1.4 | -1.5094 | 6.531 | 0.014604 | 0.103103 | d.1.5 | -2.9040 | 26.179 | 0.058538 | 0.995287 | d.1.6 | -1.6540 | 4.881 | 0.010915 | 0.084347 | sd.d | 5.1460 | 1.867 | 0.004174 | 0.026200 | beta[2] | 1.2361 | 6.488 | 0.014509 | 1.132292 | beta[3] | 6.4383 | 3.392 | 0.007585 | 0.576225 | beta[4] | -0.7476 | 139.261 | 0.311397 | 4.799500 | beta[5] | 1.7722 | 81.373 | 0.181955 | 3.398466 | beta[6] | -8.4963 | 93.248 | 0.208509 | 4.991421 |  | 2.5% | 25% | 50% | 75% | 97.5% | d.1.2 | -6.8293 | -2.399 | -0.56917 | 1.249 | 5.617 | d.1.3 | -9.9394 | -6.754 | -5.41262 | -4.132 | -1.125 | d.1.4 | -14.2462 | -5.172 | -1.52422 | 2.129 | 11.613 | d.1.5 | -52.2607 | -12.981 | -3.38063 | 6.152 | 55.786 | d.1.6 | -11.4081 | -4.590 | -1.69322 | 1.217 | 8.459 | sd.d | 2.5541 | 3.845 | 4.79175 | 6.054 | 9.786 | beta[2] | -9.5725 | -3.685 | 0.75760 | 5.165 | 15.634 | beta[3] | 0.6883 | 4.027 | 6.09224 | 8.475 | 14.021 | beta[4] | -228.5349 | -19.038 | -0.11935 | 18.566 | 212.332 | beta[5] | -154.3489 | -17.769 | 0.04431 | 17.965 | 191.149 | beta[6] | -267.7240 | -21.814 | -1.17367 | 17.775 | 170.818 | Dbar | pD | DIC | 28.25290 | 27.27184 | 55.52474 | <p>1. Empirical mean and standard deviation for each variable, plus standard error of the mean:</p> <table border="0"> <thead> <tr> <th></th> <th>Mean</th> <th>SD</th> <th>Naive SE</th> <th>Time-series SE</th> </tr> </thead> <tbody> <tr><td>d.1.2</td><td>-0.7493</td><td>3.604</td><td>0.008059</td><td>0.04618</td></tr> <tr><td>d.1.3</td><td>-4.5065</td><td>2.610</td><td>0.005835</td><td>0.03069</td></tr> <tr><td>d.1.4</td><td>-3.8149</td><td>27.144</td><td>0.060695</td><td>2.68218</td></tr> <tr><td>d.1.5</td><td>-3.2766</td><td>40.382</td><td>0.090298</td><td>2.07924</td></tr> <tr><td>d.1.6</td><td>12.8579</td><td>29.130</td><td>0.065137</td><td>2.12090</td></tr> <tr><td>sd.d</td><td>5.7165</td><td>2.323</td><td>0.005194</td><td>0.05207</td></tr> <tr><td>beta[2]</td><td>1.5202</td><td>6.144</td><td>0.013739</td><td>2.05077</td></tr> <tr><td>beta[3]</td><td>4.5842</td><td>5.407</td><td>0.012091</td><td>0.60388</td></tr> <tr><td>beta[4]</td><td>-4.7028</td><td>54.476</td><td>0.121812</td><td>5.60773</td></tr> <tr><td>beta[5]</td><td>-0.2878</td><td>60.649</td><td>0.135616</td><td>3.13102</td></tr> <tr><td>beta[6]</td><td>138.4542</td><td>265.517</td><td>0.593713</td><td>24.50683</td></tr> </tbody> </table> <p>2. Quantiles for each variable:</p> <table border="0"> <thead> <tr> <th></th> <th>2.5%</th> <th>25%</th> <th>50%</th> <th>75%</th> <th>97.5%</th> </tr> </thead> <tbody> <tr><td>d.1.2</td><td>-8.686</td><td>-2.655</td><td>-0.6072</td><td>1.362</td><td>6.0932</td></tr> <tr><td>d.1.3</td><td>-10.130</td><td>-5.987</td><td>-4.3506</td><td>-2.880</td><td>0.3141</td></tr> <tr><td>d.1.4</td><td>-60.461</td><td>-11.926</td><td>-2.1137</td><td>7.443</td><td>44.4534</td></tr> <tr><td>d.1.5</td><td>-97.842</td><td>-17.881</td><td>-3.1702</td><td>11.867</td><td>86.9248</td></tr> <tr><td>d.1.6</td><td>-18.794</td><td>-4.736</td><td>0.2603</td><td>18.829</td><td>84.7473</td></tr> <tr><td>sd.d</td><td>2.605</td><td>4.108</td><td>5.2322</td><td>6.777</td><td>11.7273</td></tr> <tr><td>beta[2]</td><td>-7.036</td><td>-1.916</td><td>0.6971</td><td>3.153</td><td>21.6595</td></tr> <tr><td>beta[3]</td><td>-6.975</td><td>1.136</td><td>4.9575</td><td>8.309</td><td>14.5036</td></tr> <tr><td>beta[4]</td><td>-119.848</td><td>-17.867</td><td>-1.1542</td><td>15.033</td><td>92.7916</td></tr> <tr><td>beta[5]</td><td>-137.792</td><td>-18.745</td><td>-0.3204</td><td>17.537</td><td>144.8557</td></tr> <tr><td>beta[6]</td><td>-117.531</td><td>-11.539</td><td>8.3265</td><td>166.304</td><td>799.2862</td></tr> </tbody> </table> <p>-- Model fit (residual deviance):</p> <table border="0"> <thead> <tr> <th>Dbar</th> <th>pD</th> <th>DIC</th> </tr> </thead> <tbody> <tr> <td>29.02003</td> <td>27.65391</td> <td>56.67395</td> </tr> </tbody> </table> <p>28 data points, ratio 1.036, I<sup>2</sup> = 7%</p> |  | Mean | SD | Naive SE | Time-series SE | d.1.2 | -0.7493 | 3.604 | 0.008059 | 0.04618 | d.1.3 | -4.5065 | 2.610 | 0.005835 | 0.03069 | d.1.4 | -3.8149 | 27.144 | 0.060695 | 2.68218 | d.1.5 | -3.2766 | 40.382 | 0.090298 | 2.07924 | d.1.6 | 12.8579 | 29.130 | 0.065137 | 2.12090 | sd.d | 5.7165 | 2.323 | 0.005194 | 0.05207 | beta[2] | 1.5202 | 6.144 | 0.013739 | 2.05077 | beta[3] | 4.5842 | 5.407 | 0.012091 | 0.60388 | beta[4] | -4.7028 | 54.476 | 0.121812 | 5.60773 | beta[5] | -0.2878 | 60.649 | 0.135616 | 3.13102 | beta[6] | 138.4542 | 265.517 | 0.593713 | 24.50683 |  | 2.5% | 25% | 50% | 75% | 97.5% | d.1.2 | -8.686 | -2.655 | -0.6072 | 1.362 | 6.0932 | d.1.3 | -10.130 | -5.987 | -4.3506 | -2.880 | 0.3141 | d.1.4 | -60.461 | -11.926 | -2.1137 | 7.443 | 44.4534 | d.1.5 | -97.842 | -17.881 | -3.1702 | 11.867 | 86.9248 | d.1.6 | -18.794 | -4.736 | 0.2603 | 18.829 | 84.7473 | sd.d | 2.605 | 4.108 | 5.2322 | 6.777 | 11.7273 | beta[2] | -7.036 | -1.916 | 0.6971 | 3.153 | 21.6595 | beta[3] | -6.975 | 1.136 | 4.9575 | 8.309 | 14.5036 | beta[4] | -119.848 | -17.867 | -1.1542 | 15.033 | 92.7916 | beta[5] | -137.792 | -18.745 | -0.3204 | 17.537 | 144.8557 | beta[6] | -117.531 | -11.539 | 8.3265 | 166.304 | 799.2862 | Dbar | pD | DIC | 29.02003 | 27.65391 | 56.67395 |
|--------------------------------------------------------------------------------------------------------------------------------------------------------------------------------------------------------------------------------------------------------------------------------------------------------------------------------------------------------------------------------------------------------------------------------------------------------------------------------------------------------------------------------------------------------------------------------------------------------------------------------------------------------------------------------------------------------------------------------------------------------------------------------------------------------------------------------------------------------------------------------------------------------------------------------------------------------------------------------------------------------------------------------------------------------------------------------------------------------------------------------------------------------------------------------------------------------------------------------------------------------------------------------------------------------------------------------------------------------------------------------------------------------------------------------------------------------------------------------------------------------------------------------------------------------------------------------------------------------------------------------------------------------------------------------------------------------------------------------------------------------------------------------------------------------------------------------------------------------------------------------------------------------------------------------------------------------------------------------------------------------------------------------------------------------------------------------------------------------------------------------------------------------------------------------------------------------------------------------------------------------------------------------------------------------------------------------------------------------------------------------------------------------------------------------------------------------------------------------------------------------------------------------------------------------------------------------------------------------------------------------------------------------------------------------------------------------------------------------------------------------------------------------------------------------------------------------------------------------------------------------------------------------------------------------------|-----------|----------|----------|----------------|----------------|-------|---------|-------|----------|----------|-------|---------|-------|----------|----------|-------|---------|-------|----------|----------|-------|---------|--------|----------|----------|-------|---------|-------|----------|----------|------|--------|-------|----------|----------|---------|--------|-------|----------|----------|---------|--------|-------|----------|----------|---------|---------|---------|----------|----------|---------|--------|--------|----------|----------|---------|---------|--------|----------|----------|--|------|-----|-----|-----|-------|-------|---------|--------|----------|-------|-------|-------|---------|--------|----------|--------|--------|-------|----------|--------|----------|-------|--------|-------|----------|---------|----------|-------|--------|-------|----------|--------|----------|-------|-------|------|--------|-------|---------|-------|-------|---------|---------|--------|---------|-------|--------|---------|--------|-------|---------|-------|--------|---------|-----------|---------|----------|--------|---------|---------|-----------|---------|---------|--------|---------|---------|-----------|---------|----------|--------|---------|------|----|-----|----------|----------|----------|--------------------------------------------------------------------------------------------------------------------------------------------------------------------------------------------------------------------------------------------------------------------------------------------------------------------------------------------------------------------------------------------------------------------------------------------------------------------------------------------------------------------------------------------------------------------------------------------------------------------------------------------------------------------------------------------------------------------------------------------------------------------------------------------------------------------------------------------------------------------------------------------------------------------------------------------------------------------------------------------------------------------------------------------------------------------------------------------------------------------------------------------------------------------------------------------------------------------------------------------------------------------------------------------------------------------------------------------------------------------------------------------------------------------------------------------------------------------------------------------------------------------------------------------------------------------------------------------------------------------------------------------------------------------------------------------------------------------------------------------------------------------------------------------------------------------------------------------------------------------------------------------------------------------------------------------------------------------------------------------------------------------------------------------------------------------------------------------------------------------------------------------------------------------------------------------------------------------------------------------------------------------------------------------------------------------------------------------------------------------------------------------------------------------------------------------------------------------------------------------------------------------------------------------------------------------------------------------------------------------------------------------------------------------------------------------------------------------------------------------------------------------------------------------------------------------------------------------------------------------------------------------------------------------------|--|------|----|----------|----------------|-------|---------|-------|----------|---------|-------|---------|-------|----------|---------|-------|---------|--------|----------|---------|-------|---------|--------|----------|---------|-------|---------|--------|----------|---------|------|--------|-------|----------|---------|---------|--------|-------|----------|---------|---------|--------|-------|----------|---------|---------|---------|--------|----------|---------|---------|---------|--------|----------|---------|---------|----------|---------|----------|----------|--|------|-----|-----|-----|-------|-------|--------|--------|---------|-------|--------|-------|---------|--------|---------|--------|--------|-------|---------|---------|---------|-------|---------|-------|---------|---------|---------|--------|---------|-------|---------|--------|--------|--------|---------|------|-------|-------|--------|-------|---------|---------|--------|--------|--------|-------|---------|---------|--------|-------|--------|-------|---------|---------|----------|---------|---------|--------|---------|---------|----------|---------|---------|--------|----------|---------|----------|---------|--------|---------|----------|------|----|-----|----------|----------|----------|
|                                                                                                                                                                                                                                                                                                                                                                                                                                                                                                                                                                                                                                                                                                                                                                                                                                                                                                                                                                                                                                                                                                                                                                                                                                                                                                                                                                                                                                                                                                                                                                                                                                                                                                                                                                                                                                                                                                                                                                                                                                                                                                                                                                                                                                                                                                                                                                                                                                                                                                                                                                                                                                                                                                                                                                                                                                                                                                                                      | Mean      | SD       | Naive SE | Time-series SE |                |       |         |       |          |          |       |         |       |          |          |       |         |       |          |          |       |         |        |          |          |       |         |       |          |          |      |        |       |          |          |         |        |       |          |          |         |        |       |          |          |         |         |         |          |          |         |        |        |          |          |         |         |        |          |          |  |      |     |     |     |       |       |         |        |          |       |       |       |         |        |          |        |        |       |          |        |          |       |        |       |          |         |          |       |        |       |          |        |          |       |       |      |        |       |         |       |       |         |         |        |         |       |        |         |        |       |         |       |        |         |           |         |          |        |         |         |           |         |         |        |         |         |           |         |          |        |         |      |    |     |          |          |          |                                                                                                                                                                                                                                                                                                                                                                                                                                                                                                                                                                                                                                                                                                                                                                                                                                                                                                                                                                                                                                                                                                                                                                                                                                                                                                                                                                                                                                                                                                                                                                                                                                                                                                                                                                                                                                                                                                                                                                                                                                                                                                                                                                                                                                                                                                                                                                                                                                                                                                                                                                                                                                                                                                                                                                                                                                                                                                                          |  |      |    |          |                |       |         |       |          |         |       |         |       |          |         |       |         |        |          |         |       |         |        |          |         |       |         |        |          |         |      |        |       |          |         |         |        |       |          |         |         |        |       |          |         |         |         |        |          |         |         |         |        |          |         |         |          |         |          |          |  |      |     |     |     |       |       |        |        |         |       |        |       |         |        |         |        |        |       |         |         |         |       |         |       |         |         |         |        |         |       |         |        |        |        |         |      |       |       |        |       |         |         |        |        |        |       |         |         |        |       |        |       |         |         |          |         |         |        |         |         |          |         |         |        |          |         |          |         |        |         |          |      |    |     |          |          |          |
| d.1.2                                                                                                                                                                                                                                                                                                                                                                                                                                                                                                                                                                                                                                                                                                                                                                                                                                                                                                                                                                                                                                                                                                                                                                                                                                                                                                                                                                                                                                                                                                                                                                                                                                                                                                                                                                                                                                                                                                                                                                                                                                                                                                                                                                                                                                                                                                                                                                                                                                                                                                                                                                                                                                                                                                                                                                                                                                                                                                                                | -0.5812   | 3.085    | 0.006899 | 0.021236       |                |       |         |       |          |          |       |         |       |          |          |       |         |       |          |          |       |         |        |          |          |       |         |       |          |          |      |        |       |          |          |         |        |       |          |          |         |        |       |          |          |         |         |         |          |          |         |        |        |          |          |         |         |        |          |          |  |      |     |     |     |       |       |         |        |          |       |       |       |         |        |          |        |        |       |          |        |          |       |        |       |          |         |          |       |        |       |          |        |          |       |       |      |        |       |         |       |       |         |         |        |         |       |        |         |        |       |         |       |        |         |           |         |          |        |         |         |           |         |         |        |         |         |           |         |          |        |         |      |    |     |          |          |          |                                                                                                                                                                                                                                                                                                                                                                                                                                                                                                                                                                                                                                                                                                                                                                                                                                                                                                                                                                                                                                                                                                                                                                                                                                                                                                                                                                                                                                                                                                                                                                                                                                                                                                                                                                                                                                                                                                                                                                                                                                                                                                                                                                                                                                                                                                                                                                                                                                                                                                                                                                                                                                                                                                                                                                                                                                                                                                                          |  |      |    |          |                |       |         |       |          |         |       |         |       |          |         |       |         |        |          |         |       |         |        |          |         |       |         |        |          |         |      |        |       |          |         |         |        |       |          |         |         |        |       |          |         |         |         |        |          |         |         |         |        |          |         |         |          |         |          |          |  |      |     |     |     |       |       |        |        |         |       |        |       |         |        |         |        |        |       |         |         |         |       |         |       |         |         |         |        |         |       |         |        |        |        |         |      |       |       |        |       |         |         |        |        |        |       |         |         |        |       |        |       |         |         |          |         |         |        |         |         |          |         |         |        |          |         |          |         |        |         |          |      |    |     |          |          |          |
| d.1.3                                                                                                                                                                                                                                                                                                                                                                                                                                                                                                                                                                                                                                                                                                                                                                                                                                                                                                                                                                                                                                                                                                                                                                                                                                                                                                                                                                                                                                                                                                                                                                                                                                                                                                                                                                                                                                                                                                                                                                                                                                                                                                                                                                                                                                                                                                                                                                                                                                                                                                                                                                                                                                                                                                                                                                                                                                                                                                                                | -5.4553   | 2.195    | 0.004908 | 0.006217       |                |       |         |       |          |          |       |         |       |          |          |       |         |       |          |          |       |         |        |          |          |       |         |       |          |          |      |        |       |          |          |         |        |       |          |          |         |        |       |          |          |         |         |         |          |          |         |        |        |          |          |         |         |        |          |          |  |      |     |     |     |       |       |         |        |          |       |       |       |         |        |          |        |        |       |          |        |          |       |        |       |          |         |          |       |        |       |          |        |          |       |       |      |        |       |         |       |       |         |         |        |         |       |        |         |        |       |         |       |        |         |           |         |          |        |         |         |           |         |         |        |         |         |           |         |          |        |         |      |    |     |          |          |          |                                                                                                                                                                                                                                                                                                                                                                                                                                                                                                                                                                                                                                                                                                                                                                                                                                                                                                                                                                                                                                                                                                                                                                                                                                                                                                                                                                                                                                                                                                                                                                                                                                                                                                                                                                                                                                                                                                                                                                                                                                                                                                                                                                                                                                                                                                                                                                                                                                                                                                                                                                                                                                                                                                                                                                                                                                                                                                                          |  |      |    |          |                |       |         |       |          |         |       |         |       |          |         |       |         |        |          |         |       |         |        |          |         |       |         |        |          |         |      |        |       |          |         |         |        |       |          |         |         |        |       |          |         |         |         |        |          |         |         |         |        |          |         |         |          |         |          |          |  |      |     |     |     |       |       |        |        |         |       |        |       |         |        |         |        |        |       |         |         |         |       |         |       |         |         |         |        |         |       |         |        |        |        |         |      |       |       |        |       |         |         |        |        |        |       |         |         |        |       |        |       |         |         |          |         |         |        |         |         |          |         |         |        |          |         |          |         |        |         |          |      |    |     |          |          |          |
| d.1.4                                                                                                                                                                                                                                                                                                                                                                                                                                                                                                                                                                                                                                                                                                                                                                                                                                                                                                                                                                                                                                                                                                                                                                                                                                                                                                                                                                                                                                                                                                                                                                                                                                                                                                                                                                                                                                                                                                                                                                                                                                                                                                                                                                                                                                                                                                                                                                                                                                                                                                                                                                                                                                                                                                                                                                                                                                                                                                                                | -1.5094   | 6.531    | 0.014604 | 0.103103       |                |       |         |       |          |          |       |         |       |          |          |       |         |       |          |          |       |         |        |          |          |       |         |       |          |          |      |        |       |          |          |         |        |       |          |          |         |        |       |          |          |         |         |         |          |          |         |        |        |          |          |         |         |        |          |          |  |      |     |     |     |       |       |         |        |          |       |       |       |         |        |          |        |        |       |          |        |          |       |        |       |          |         |          |       |        |       |          |        |          |       |       |      |        |       |         |       |       |         |         |        |         |       |        |         |        |       |         |       |        |         |           |         |          |        |         |         |           |         |         |        |         |         |           |         |          |        |         |      |    |     |          |          |          |                                                                                                                                                                                                                                                                                                                                                                                                                                                                                                                                                                                                                                                                                                                                                                                                                                                                                                                                                                                                                                                                                                                                                                                                                                                                                                                                                                                                                                                                                                                                                                                                                                                                                                                                                                                                                                                                                                                                                                                                                                                                                                                                                                                                                                                                                                                                                                                                                                                                                                                                                                                                                                                                                                                                                                                                                                                                                                                          |  |      |    |          |                |       |         |       |          |         |       |         |       |          |         |       |         |        |          |         |       |         |        |          |         |       |         |        |          |         |      |        |       |          |         |         |        |       |          |         |         |        |       |          |         |         |         |        |          |         |         |         |        |          |         |         |          |         |          |          |  |      |     |     |     |       |       |        |        |         |       |        |       |         |        |         |        |        |       |         |         |         |       |         |       |         |         |         |        |         |       |         |        |        |        |         |      |       |       |        |       |         |         |        |        |        |       |         |         |        |       |        |       |         |         |          |         |         |        |         |         |          |         |         |        |          |         |          |         |        |         |          |      |    |     |          |          |          |
| d.1.5                                                                                                                                                                                                                                                                                                                                                                                                                                                                                                                                                                                                                                                                                                                                                                                                                                                                                                                                                                                                                                                                                                                                                                                                                                                                                                                                                                                                                                                                                                                                                                                                                                                                                                                                                                                                                                                                                                                                                                                                                                                                                                                                                                                                                                                                                                                                                                                                                                                                                                                                                                                                                                                                                                                                                                                                                                                                                                                                | -2.9040   | 26.179   | 0.058538 | 0.995287       |                |       |         |       |          |          |       |         |       |          |          |       |         |       |          |          |       |         |        |          |          |       |         |       |          |          |      |        |       |          |          |         |        |       |          |          |         |        |       |          |          |         |         |         |          |          |         |        |        |          |          |         |         |        |          |          |  |      |     |     |     |       |       |         |        |          |       |       |       |         |        |          |        |        |       |          |        |          |       |        |       |          |         |          |       |        |       |          |        |          |       |       |      |        |       |         |       |       |         |         |        |         |       |        |         |        |       |         |       |        |         |           |         |          |        |         |         |           |         |         |        |         |         |           |         |          |        |         |      |    |     |          |          |          |                                                                                                                                                                                                                                                                                                                                                                                                                                                                                                                                                                                                                                                                                                                                                                                                                                                                                                                                                                                                                                                                                                                                                                                                                                                                                                                                                                                                                                                                                                                                                                                                                                                                                                                                                                                                                                                                                                                                                                                                                                                                                                                                                                                                                                                                                                                                                                                                                                                                                                                                                                                                                                                                                                                                                                                                                                                                                                                          |  |      |    |          |                |       |         |       |          |         |       |         |       |          |         |       |         |        |          |         |       |         |        |          |         |       |         |        |          |         |      |        |       |          |         |         |        |       |          |         |         |        |       |          |         |         |         |        |          |         |         |         |        |          |         |         |          |         |          |          |  |      |     |     |     |       |       |        |        |         |       |        |       |         |        |         |        |        |       |         |         |         |       |         |       |         |         |         |        |         |       |         |        |        |        |         |      |       |       |        |       |         |         |        |        |        |       |         |         |        |       |        |       |         |         |          |         |         |        |         |         |          |         |         |        |          |         |          |         |        |         |          |      |    |     |          |          |          |
| d.1.6                                                                                                                                                                                                                                                                                                                                                                                                                                                                                                                                                                                                                                                                                                                                                                                                                                                                                                                                                                                                                                                                                                                                                                                                                                                                                                                                                                                                                                                                                                                                                                                                                                                                                                                                                                                                                                                                                                                                                                                                                                                                                                                                                                                                                                                                                                                                                                                                                                                                                                                                                                                                                                                                                                                                                                                                                                                                                                                                | -1.6540   | 4.881    | 0.010915 | 0.084347       |                |       |         |       |          |          |       |         |       |          |          |       |         |       |          |          |       |         |        |          |          |       |         |       |          |          |      |        |       |          |          |         |        |       |          |          |         |        |       |          |          |         |         |         |          |          |         |        |        |          |          |         |         |        |          |          |  |      |     |     |     |       |       |         |        |          |       |       |       |         |        |          |        |        |       |          |        |          |       |        |       |          |         |          |       |        |       |          |        |          |       |       |      |        |       |         |       |       |         |         |        |         |       |        |         |        |       |         |       |        |         |           |         |          |        |         |         |           |         |         |        |         |         |           |         |          |        |         |      |    |     |          |          |          |                                                                                                                                                                                                                                                                                                                                                                                                                                                                                                                                                                                                                                                                                                                                                                                                                                                                                                                                                                                                                                                                                                                                                                                                                                                                                                                                                                                                                                                                                                                                                                                                                                                                                                                                                                                                                                                                                                                                                                                                                                                                                                                                                                                                                                                                                                                                                                                                                                                                                                                                                                                                                                                                                                                                                                                                                                                                                                                          |  |      |    |          |                |       |         |       |          |         |       |         |       |          |         |       |         |        |          |         |       |         |        |          |         |       |         |        |          |         |      |        |       |          |         |         |        |       |          |         |         |        |       |          |         |         |         |        |          |         |         |         |        |          |         |         |          |         |          |          |  |      |     |     |     |       |       |        |        |         |       |        |       |         |        |         |        |        |       |         |         |         |       |         |       |         |         |         |        |         |       |         |        |        |        |         |      |       |       |        |       |         |         |        |        |        |       |         |         |        |       |        |       |         |         |          |         |         |        |         |         |          |         |         |        |          |         |          |         |        |         |          |      |    |     |          |          |          |
| sd.d                                                                                                                                                                                                                                                                                                                                                                                                                                                                                                                                                                                                                                                                                                                                                                                                                                                                                                                                                                                                                                                                                                                                                                                                                                                                                                                                                                                                                                                                                                                                                                                                                                                                                                                                                                                                                                                                                                                                                                                                                                                                                                                                                                                                                                                                                                                                                                                                                                                                                                                                                                                                                                                                                                                                                                                                                                                                                                                                 | 5.1460    | 1.867    | 0.004174 | 0.026200       |                |       |         |       |          |          |       |         |       |          |          |       |         |       |          |          |       |         |        |          |          |       |         |       |          |          |      |        |       |          |          |         |        |       |          |          |         |        |       |          |          |         |         |         |          |          |         |        |        |          |          |         |         |        |          |          |  |      |     |     |     |       |       |         |        |          |       |       |       |         |        |          |        |        |       |          |        |          |       |        |       |          |         |          |       |        |       |          |        |          |       |       |      |        |       |         |       |       |         |         |        |         |       |        |         |        |       |         |       |        |         |           |         |          |        |         |         |           |         |         |        |         |         |           |         |          |        |         |      |    |     |          |          |          |                                                                                                                                                                                                                                                                                                                                                                                                                                                                                                                                                                                                                                                                                                                                                                                                                                                                                                                                                                                                                                                                                                                                                                                                                                                                                                                                                                                                                                                                                                                                                                                                                                                                                                                                                                                                                                                                                                                                                                                                                                                                                                                                                                                                                                                                                                                                                                                                                                                                                                                                                                                                                                                                                                                                                                                                                                                                                                                          |  |      |    |          |                |       |         |       |          |         |       |         |       |          |         |       |         |        |          |         |       |         |        |          |         |       |         |        |          |         |      |        |       |          |         |         |        |       |          |         |         |        |       |          |         |         |         |        |          |         |         |         |        |          |         |         |          |         |          |          |  |      |     |     |     |       |       |        |        |         |       |        |       |         |        |         |        |        |       |         |         |         |       |         |       |         |         |         |        |         |       |         |        |        |        |         |      |       |       |        |       |         |         |        |        |        |       |         |         |        |       |        |       |         |         |          |         |         |        |         |         |          |         |         |        |          |         |          |         |        |         |          |      |    |     |          |          |          |
| beta[2]                                                                                                                                                                                                                                                                                                                                                                                                                                                                                                                                                                                                                                                                                                                                                                                                                                                                                                                                                                                                                                                                                                                                                                                                                                                                                                                                                                                                                                                                                                                                                                                                                                                                                                                                                                                                                                                                                                                                                                                                                                                                                                                                                                                                                                                                                                                                                                                                                                                                                                                                                                                                                                                                                                                                                                                                                                                                                                                              | 1.2361    | 6.488    | 0.014509 | 1.132292       |                |       |         |       |          |          |       |         |       |          |          |       |         |       |          |          |       |         |        |          |          |       |         |       |          |          |      |        |       |          |          |         |        |       |          |          |         |        |       |          |          |         |         |         |          |          |         |        |        |          |          |         |         |        |          |          |  |      |     |     |     |       |       |         |        |          |       |       |       |         |        |          |        |        |       |          |        |          |       |        |       |          |         |          |       |        |       |          |        |          |       |       |      |        |       |         |       |       |         |         |        |         |       |        |         |        |       |         |       |        |         |           |         |          |        |         |         |           |         |         |        |         |         |           |         |          |        |         |      |    |     |          |          |          |                                                                                                                                                                                                                                                                                                                                                                                                                                                                                                                                                                                                                                                                                                                                                                                                                                                                                                                                                                                                                                                                                                                                                                                                                                                                                                                                                                                                                                                                                                                                                                                                                                                                                                                                                                                                                                                                                                                                                                                                                                                                                                                                                                                                                                                                                                                                                                                                                                                                                                                                                                                                                                                                                                                                                                                                                                                                                                                          |  |      |    |          |                |       |         |       |          |         |       |         |       |          |         |       |         |        |          |         |       |         |        |          |         |       |         |        |          |         |      |        |       |          |         |         |        |       |          |         |         |        |       |          |         |         |         |        |          |         |         |         |        |          |         |         |          |         |          |          |  |      |     |     |     |       |       |        |        |         |       |        |       |         |        |         |        |        |       |         |         |         |       |         |       |         |         |         |        |         |       |         |        |        |        |         |      |       |       |        |       |         |         |        |        |        |       |         |         |        |       |        |       |         |         |          |         |         |        |         |         |          |         |         |        |          |         |          |         |        |         |          |      |    |     |          |          |          |
| beta[3]                                                                                                                                                                                                                                                                                                                                                                                                                                                                                                                                                                                                                                                                                                                                                                                                                                                                                                                                                                                                                                                                                                                                                                                                                                                                                                                                                                                                                                                                                                                                                                                                                                                                                                                                                                                                                                                                                                                                                                                                                                                                                                                                                                                                                                                                                                                                                                                                                                                                                                                                                                                                                                                                                                                                                                                                                                                                                                                              | 6.4383    | 3.392    | 0.007585 | 0.576225       |                |       |         |       |          |          |       |         |       |          |          |       |         |       |          |          |       |         |        |          |          |       |         |       |          |          |      |        |       |          |          |         |        |       |          |          |         |        |       |          |          |         |         |         |          |          |         |        |        |          |          |         |         |        |          |          |  |      |     |     |     |       |       |         |        |          |       |       |       |         |        |          |        |        |       |          |        |          |       |        |       |          |         |          |       |        |       |          |        |          |       |       |      |        |       |         |       |       |         |         |        |         |       |        |         |        |       |         |       |        |         |           |         |          |        |         |         |           |         |         |        |         |         |           |         |          |        |         |      |    |     |          |          |          |                                                                                                                                                                                                                                                                                                                                                                                                                                                                                                                                                                                                                                                                                                                                                                                                                                                                                                                                                                                                                                                                                                                                                                                                                                                                                                                                                                                                                                                                                                                                                                                                                                                                                                                                                                                                                                                                                                                                                                                                                                                                                                                                                                                                                                                                                                                                                                                                                                                                                                                                                                                                                                                                                                                                                                                                                                                                                                                          |  |      |    |          |                |       |         |       |          |         |       |         |       |          |         |       |         |        |          |         |       |         |        |          |         |       |         |        |          |         |      |        |       |          |         |         |        |       |          |         |         |        |       |          |         |         |         |        |          |         |         |         |        |          |         |         |          |         |          |          |  |      |     |     |     |       |       |        |        |         |       |        |       |         |        |         |        |        |       |         |         |         |       |         |       |         |         |         |        |         |       |         |        |        |        |         |      |       |       |        |       |         |         |        |        |        |       |         |         |        |       |        |       |         |         |          |         |         |        |         |         |          |         |         |        |          |         |          |         |        |         |          |      |    |     |          |          |          |
| beta[4]                                                                                                                                                                                                                                                                                                                                                                                                                                                                                                                                                                                                                                                                                                                                                                                                                                                                                                                                                                                                                                                                                                                                                                                                                                                                                                                                                                                                                                                                                                                                                                                                                                                                                                                                                                                                                                                                                                                                                                                                                                                                                                                                                                                                                                                                                                                                                                                                                                                                                                                                                                                                                                                                                                                                                                                                                                                                                                                              | -0.7476   | 139.261  | 0.311397 | 4.799500       |                |       |         |       |          |          |       |         |       |          |          |       |         |       |          |          |       |         |        |          |          |       |         |       |          |          |      |        |       |          |          |         |        |       |          |          |         |        |       |          |          |         |         |         |          |          |         |        |        |          |          |         |         |        |          |          |  |      |     |     |     |       |       |         |        |          |       |       |       |         |        |          |        |        |       |          |        |          |       |        |       |          |         |          |       |        |       |          |        |          |       |       |      |        |       |         |       |       |         |         |        |         |       |        |         |        |       |         |       |        |         |           |         |          |        |         |         |           |         |         |        |         |         |           |         |          |        |         |      |    |     |          |          |          |                                                                                                                                                                                                                                                                                                                                                                                                                                                                                                                                                                                                                                                                                                                                                                                                                                                                                                                                                                                                                                                                                                                                                                                                                                                                                                                                                                                                                                                                                                                                                                                                                                                                                                                                                                                                                                                                                                                                                                                                                                                                                                                                                                                                                                                                                                                                                                                                                                                                                                                                                                                                                                                                                                                                                                                                                                                                                                                          |  |      |    |          |                |       |         |       |          |         |       |         |       |          |         |       |         |        |          |         |       |         |        |          |         |       |         |        |          |         |      |        |       |          |         |         |        |       |          |         |         |        |       |          |         |         |         |        |          |         |         |         |        |          |         |         |          |         |          |          |  |      |     |     |     |       |       |        |        |         |       |        |       |         |        |         |        |        |       |         |         |         |       |         |       |         |         |         |        |         |       |         |        |        |        |         |      |       |       |        |       |         |         |        |        |        |       |         |         |        |       |        |       |         |         |          |         |         |        |         |         |          |         |         |        |          |         |          |         |        |         |          |      |    |     |          |          |          |
| beta[5]                                                                                                                                                                                                                                                                                                                                                                                                                                                                                                                                                                                                                                                                                                                                                                                                                                                                                                                                                                                                                                                                                                                                                                                                                                                                                                                                                                                                                                                                                                                                                                                                                                                                                                                                                                                                                                                                                                                                                                                                                                                                                                                                                                                                                                                                                                                                                                                                                                                                                                                                                                                                                                                                                                                                                                                                                                                                                                                              | 1.7722    | 81.373   | 0.181955 | 3.398466       |                |       |         |       |          |          |       |         |       |          |          |       |         |       |          |          |       |         |        |          |          |       |         |       |          |          |      |        |       |          |          |         |        |       |          |          |         |        |       |          |          |         |         |         |          |          |         |        |        |          |          |         |         |        |          |          |  |      |     |     |     |       |       |         |        |          |       |       |       |         |        |          |        |        |       |          |        |          |       |        |       |          |         |          |       |        |       |          |        |          |       |       |      |        |       |         |       |       |         |         |        |         |       |        |         |        |       |         |       |        |         |           |         |          |        |         |         |           |         |         |        |         |         |           |         |          |        |         |      |    |     |          |          |          |                                                                                                                                                                                                                                                                                                                                                                                                                                                                                                                                                                                                                                                                                                                                                                                                                                                                                                                                                                                                                                                                                                                                                                                                                                                                                                                                                                                                                                                                                                                                                                                                                                                                                                                                                                                                                                                                                                                                                                                                                                                                                                                                                                                                                                                                                                                                                                                                                                                                                                                                                                                                                                                                                                                                                                                                                                                                                                                          |  |      |    |          |                |       |         |       |          |         |       |         |       |          |         |       |         |        |          |         |       |         |        |          |         |       |         |        |          |         |      |        |       |          |         |         |        |       |          |         |         |        |       |          |         |         |         |        |          |         |         |         |        |          |         |         |          |         |          |          |  |      |     |     |     |       |       |        |        |         |       |        |       |         |        |         |        |        |       |         |         |         |       |         |       |         |         |         |        |         |       |         |        |        |        |         |      |       |       |        |       |         |         |        |        |        |       |         |         |        |       |        |       |         |         |          |         |         |        |         |         |          |         |         |        |          |         |          |         |        |         |          |      |    |     |          |          |          |
| beta[6]                                                                                                                                                                                                                                                                                                                                                                                                                                                                                                                                                                                                                                                                                                                                                                                                                                                                                                                                                                                                                                                                                                                                                                                                                                                                                                                                                                                                                                                                                                                                                                                                                                                                                                                                                                                                                                                                                                                                                                                                                                                                                                                                                                                                                                                                                                                                                                                                                                                                                                                                                                                                                                                                                                                                                                                                                                                                                                                              | -8.4963   | 93.248   | 0.208509 | 4.991421       |                |       |         |       |          |          |       |         |       |          |          |       |         |       |          |          |       |         |        |          |          |       |         |       |          |          |      |        |       |          |          |         |        |       |          |          |         |        |       |          |          |         |         |         |          |          |         |        |        |          |          |         |         |        |          |          |  |      |     |     |     |       |       |         |        |          |       |       |       |         |        |          |        |        |       |          |        |          |       |        |       |          |         |          |       |        |       |          |        |          |       |       |      |        |       |         |       |       |         |         |        |         |       |        |         |        |       |         |       |        |         |           |         |          |        |         |         |           |         |         |        |         |         |           |         |          |        |         |      |    |     |          |          |          |                                                                                                                                                                                                                                                                                                                                                                                                                                                                                                                                                                                                                                                                                                                                                                                                                                                                                                                                                                                                                                                                                                                                                                                                                                                                                                                                                                                                                                                                                                                                                                                                                                                                                                                                                                                                                                                                                                                                                                                                                                                                                                                                                                                                                                                                                                                                                                                                                                                                                                                                                                                                                                                                                                                                                                                                                                                                                                                          |  |      |    |          |                |       |         |       |          |         |       |         |       |          |         |       |         |        |          |         |       |         |        |          |         |       |         |        |          |         |      |        |       |          |         |         |        |       |          |         |         |        |       |          |         |         |         |        |          |         |         |         |        |          |         |         |          |         |          |          |  |      |     |     |     |       |       |        |        |         |       |        |       |         |        |         |        |        |       |         |         |         |       |         |       |         |         |         |        |         |       |         |        |        |        |         |      |       |       |        |       |         |         |        |        |        |       |         |         |        |       |        |       |         |         |          |         |         |        |         |         |          |         |         |        |          |         |          |         |        |         |          |      |    |     |          |          |          |
|                                                                                                                                                                                                                                                                                                                                                                                                                                                                                                                                                                                                                                                                                                                                                                                                                                                                                                                                                                                                                                                                                                                                                                                                                                                                                                                                                                                                                                                                                                                                                                                                                                                                                                                                                                                                                                                                                                                                                                                                                                                                                                                                                                                                                                                                                                                                                                                                                                                                                                                                                                                                                                                                                                                                                                                                                                                                                                                                      | 2.5%      | 25%      | 50%      | 75%            | 97.5%          |       |         |       |          |          |       |         |       |          |          |       |         |       |          |          |       |         |        |          |          |       |         |       |          |          |      |        |       |          |          |         |        |       |          |          |         |        |       |          |          |         |         |         |          |          |         |        |        |          |          |         |         |        |          |          |  |      |     |     |     |       |       |         |        |          |       |       |       |         |        |          |        |        |       |          |        |          |       |        |       |          |         |          |       |        |       |          |        |          |       |       |      |        |       |         |       |       |         |         |        |         |       |        |         |        |       |         |       |        |         |           |         |          |        |         |         |           |         |         |        |         |         |           |         |          |        |         |      |    |     |          |          |          |                                                                                                                                                                                                                                                                                                                                                                                                                                                                                                                                                                                                                                                                                                                                                                                                                                                                                                                                                                                                                                                                                                                                                                                                                                                                                                                                                                                                                                                                                                                                                                                                                                                                                                                                                                                                                                                                                                                                                                                                                                                                                                                                                                                                                                                                                                                                                                                                                                                                                                                                                                                                                                                                                                                                                                                                                                                                                                                          |  |      |    |          |                |       |         |       |          |         |       |         |       |          |         |       |         |        |          |         |       |         |        |          |         |       |         |        |          |         |      |        |       |          |         |         |        |       |          |         |         |        |       |          |         |         |         |        |          |         |         |         |        |          |         |         |          |         |          |          |  |      |     |     |     |       |       |        |        |         |       |        |       |         |        |         |        |        |       |         |         |         |       |         |       |         |         |         |        |         |       |         |        |        |        |         |      |       |       |        |       |         |         |        |        |        |       |         |         |        |       |        |       |         |         |          |         |         |        |         |         |          |         |         |        |          |         |          |         |        |         |          |      |    |     |          |          |          |
| d.1.2                                                                                                                                                                                                                                                                                                                                                                                                                                                                                                                                                                                                                                                                                                                                                                                                                                                                                                                                                                                                                                                                                                                                                                                                                                                                                                                                                                                                                                                                                                                                                                                                                                                                                                                                                                                                                                                                                                                                                                                                                                                                                                                                                                                                                                                                                                                                                                                                                                                                                                                                                                                                                                                                                                                                                                                                                                                                                                                                | -6.8293   | -2.399   | -0.56917 | 1.249          | 5.617          |       |         |       |          |          |       |         |       |          |          |       |         |       |          |          |       |         |        |          |          |       |         |       |          |          |      |        |       |          |          |         |        |       |          |          |         |        |       |          |          |         |         |         |          |          |         |        |        |          |          |         |         |        |          |          |  |      |     |     |     |       |       |         |        |          |       |       |       |         |        |          |        |        |       |          |        |          |       |        |       |          |         |          |       |        |       |          |        |          |       |       |      |        |       |         |       |       |         |         |        |         |       |        |         |        |       |         |       |        |         |           |         |          |        |         |         |           |         |         |        |         |         |           |         |          |        |         |      |    |     |          |          |          |                                                                                                                                                                                                                                                                                                                                                                                                                                                                                                                                                                                                                                                                                                                                                                                                                                                                                                                                                                                                                                                                                                                                                                                                                                                                                                                                                                                                                                                                                                                                                                                                                                                                                                                                                                                                                                                                                                                                                                                                                                                                                                                                                                                                                                                                                                                                                                                                                                                                                                                                                                                                                                                                                                                                                                                                                                                                                                                          |  |      |    |          |                |       |         |       |          |         |       |         |       |          |         |       |         |        |          |         |       |         |        |          |         |       |         |        |          |         |      |        |       |          |         |         |        |       |          |         |         |        |       |          |         |         |         |        |          |         |         |         |        |          |         |         |          |         |          |          |  |      |     |     |     |       |       |        |        |         |       |        |       |         |        |         |        |        |       |         |         |         |       |         |       |         |         |         |        |         |       |         |        |        |        |         |      |       |       |        |       |         |         |        |        |        |       |         |         |        |       |        |       |         |         |          |         |         |        |         |         |          |         |         |        |          |         |          |         |        |         |          |      |    |     |          |          |          |
| d.1.3                                                                                                                                                                                                                                                                                                                                                                                                                                                                                                                                                                                                                                                                                                                                                                                                                                                                                                                                                                                                                                                                                                                                                                                                                                                                                                                                                                                                                                                                                                                                                                                                                                                                                                                                                                                                                                                                                                                                                                                                                                                                                                                                                                                                                                                                                                                                                                                                                                                                                                                                                                                                                                                                                                                                                                                                                                                                                                                                | -9.9394   | -6.754   | -5.41262 | -4.132         | -1.125         |       |         |       |          |          |       |         |       |          |          |       |         |       |          |          |       |         |        |          |          |       |         |       |          |          |      |        |       |          |          |         |        |       |          |          |         |        |       |          |          |         |         |         |          |          |         |        |        |          |          |         |         |        |          |          |  |      |     |     |     |       |       |         |        |          |       |       |       |         |        |          |        |        |       |          |        |          |       |        |       |          |         |          |       |        |       |          |        |          |       |       |      |        |       |         |       |       |         |         |        |         |       |        |         |        |       |         |       |        |         |           |         |          |        |         |         |           |         |         |        |         |         |           |         |          |        |         |      |    |     |          |          |          |                                                                                                                                                                                                                                                                                                                                                                                                                                                                                                                                                                                                                                                                                                                                                                                                                                                                                                                                                                                                                                                                                                                                                                                                                                                                                                                                                                                                                                                                                                                                                                                                                                                                                                                                                                                                                                                                                                                                                                                                                                                                                                                                                                                                                                                                                                                                                                                                                                                                                                                                                                                                                                                                                                                                                                                                                                                                                                                          |  |      |    |          |                |       |         |       |          |         |       |         |       |          |         |       |         |        |          |         |       |         |        |          |         |       |         |        |          |         |      |        |       |          |         |         |        |       |          |         |         |        |       |          |         |         |         |        |          |         |         |         |        |          |         |         |          |         |          |          |  |      |     |     |     |       |       |        |        |         |       |        |       |         |        |         |        |        |       |         |         |         |       |         |       |         |         |         |        |         |       |         |        |        |        |         |      |       |       |        |       |         |         |        |        |        |       |         |         |        |       |        |       |         |         |          |         |         |        |         |         |          |         |         |        |          |         |          |         |        |         |          |      |    |     |          |          |          |
| d.1.4                                                                                                                                                                                                                                                                                                                                                                                                                                                                                                                                                                                                                                                                                                                                                                                                                                                                                                                                                                                                                                                                                                                                                                                                                                                                                                                                                                                                                                                                                                                                                                                                                                                                                                                                                                                                                                                                                                                                                                                                                                                                                                                                                                                                                                                                                                                                                                                                                                                                                                                                                                                                                                                                                                                                                                                                                                                                                                                                | -14.2462  | -5.172   | -1.52422 | 2.129          | 11.613         |       |         |       |          |          |       |         |       |          |          |       |         |       |          |          |       |         |        |          |          |       |         |       |          |          |      |        |       |          |          |         |        |       |          |          |         |        |       |          |          |         |         |         |          |          |         |        |        |          |          |         |         |        |          |          |  |      |     |     |     |       |       |         |        |          |       |       |       |         |        |          |        |        |       |          |        |          |       |        |       |          |         |          |       |        |       |          |        |          |       |       |      |        |       |         |       |       |         |         |        |         |       |        |         |        |       |         |       |        |         |           |         |          |        |         |         |           |         |         |        |         |         |           |         |          |        |         |      |    |     |          |          |          |                                                                                                                                                                                                                                                                                                                                                                                                                                                                                                                                                                                                                                                                                                                                                                                                                                                                                                                                                                                                                                                                                                                                                                                                                                                                                                                                                                                                                                                                                                                                                                                                                                                                                                                                                                                                                                                                                                                                                                                                                                                                                                                                                                                                                                                                                                                                                                                                                                                                                                                                                                                                                                                                                                                                                                                                                                                                                                                          |  |      |    |          |                |       |         |       |          |         |       |         |       |          |         |       |         |        |          |         |       |         |        |          |         |       |         |        |          |         |      |        |       |          |         |         |        |       |          |         |         |        |       |          |         |         |         |        |          |         |         |         |        |          |         |         |          |         |          |          |  |      |     |     |     |       |       |        |        |         |       |        |       |         |        |         |        |        |       |         |         |         |       |         |       |         |         |         |        |         |       |         |        |        |        |         |      |       |       |        |       |         |         |        |        |        |       |         |         |        |       |        |       |         |         |          |         |         |        |         |         |          |         |         |        |          |         |          |         |        |         |          |      |    |     |          |          |          |
| d.1.5                                                                                                                                                                                                                                                                                                                                                                                                                                                                                                                                                                                                                                                                                                                                                                                                                                                                                                                                                                                                                                                                                                                                                                                                                                                                                                                                                                                                                                                                                                                                                                                                                                                                                                                                                                                                                                                                                                                                                                                                                                                                                                                                                                                                                                                                                                                                                                                                                                                                                                                                                                                                                                                                                                                                                                                                                                                                                                                                | -52.2607  | -12.981  | -3.38063 | 6.152          | 55.786         |       |         |       |          |          |       |         |       |          |          |       |         |       |          |          |       |         |        |          |          |       |         |       |          |          |      |        |       |          |          |         |        |       |          |          |         |        |       |          |          |         |         |         |          |          |         |        |        |          |          |         |         |        |          |          |  |      |     |     |     |       |       |         |        |          |       |       |       |         |        |          |        |        |       |          |        |          |       |        |       |          |         |          |       |        |       |          |        |          |       |       |      |        |       |         |       |       |         |         |        |         |       |        |         |        |       |         |       |        |         |           |         |          |        |         |         |           |         |         |        |         |         |           |         |          |        |         |      |    |     |          |          |          |                                                                                                                                                                                                                                                                                                                                                                                                                                                                                                                                                                                                                                                                                                                                                                                                                                                                                                                                                                                                                                                                                                                                                                                                                                                                                                                                                                                                                                                                                                                                                                                                                                                                                                                                                                                                                                                                                                                                                                                                                                                                                                                                                                                                                                                                                                                                                                                                                                                                                                                                                                                                                                                                                                                                                                                                                                                                                                                          |  |      |    |          |                |       |         |       |          |         |       |         |       |          |         |       |         |        |          |         |       |         |        |          |         |       |         |        |          |         |      |        |       |          |         |         |        |       |          |         |         |        |       |          |         |         |         |        |          |         |         |         |        |          |         |         |          |         |          |          |  |      |     |     |     |       |       |        |        |         |       |        |       |         |        |         |        |        |       |         |         |         |       |         |       |         |         |         |        |         |       |         |        |        |        |         |      |       |       |        |       |         |         |        |        |        |       |         |         |        |       |        |       |         |         |          |         |         |        |         |         |          |         |         |        |          |         |          |         |        |         |          |      |    |     |          |          |          |
| d.1.6                                                                                                                                                                                                                                                                                                                                                                                                                                                                                                                                                                                                                                                                                                                                                                                                                                                                                                                                                                                                                                                                                                                                                                                                                                                                                                                                                                                                                                                                                                                                                                                                                                                                                                                                                                                                                                                                                                                                                                                                                                                                                                                                                                                                                                                                                                                                                                                                                                                                                                                                                                                                                                                                                                                                                                                                                                                                                                                                | -11.4081  | -4.590   | -1.69322 | 1.217          | 8.459          |       |         |       |          |          |       |         |       |          |          |       |         |       |          |          |       |         |        |          |          |       |         |       |          |          |      |        |       |          |          |         |        |       |          |          |         |        |       |          |          |         |         |         |          |          |         |        |        |          |          |         |         |        |          |          |  |      |     |     |     |       |       |         |        |          |       |       |       |         |        |          |        |        |       |          |        |          |       |        |       |          |         |          |       |        |       |          |        |          |       |       |      |        |       |         |       |       |         |         |        |         |       |        |         |        |       |         |       |        |         |           |         |          |        |         |         |           |         |         |        |         |         |           |         |          |        |         |      |    |     |          |          |          |                                                                                                                                                                                                                                                                                                                                                                                                                                                                                                                                                                                                                                                                                                                                                                                                                                                                                                                                                                                                                                                                                                                                                                                                                                                                                                                                                                                                                                                                                                                                                                                                                                                                                                                                                                                                                                                                                                                                                                                                                                                                                                                                                                                                                                                                                                                                                                                                                                                                                                                                                                                                                                                                                                                                                                                                                                                                                                                          |  |      |    |          |                |       |         |       |          |         |       |         |       |          |         |       |         |        |          |         |       |         |        |          |         |       |         |        |          |         |      |        |       |          |         |         |        |       |          |         |         |        |       |          |         |         |         |        |          |         |         |         |        |          |         |         |          |         |          |          |  |      |     |     |     |       |       |        |        |         |       |        |       |         |        |         |        |        |       |         |         |         |       |         |       |         |         |         |        |         |       |         |        |        |        |         |      |       |       |        |       |         |         |        |        |        |       |         |         |        |       |        |       |         |         |          |         |         |        |         |         |          |         |         |        |          |         |          |         |        |         |          |      |    |     |          |          |          |
| sd.d                                                                                                                                                                                                                                                                                                                                                                                                                                                                                                                                                                                                                                                                                                                                                                                                                                                                                                                                                                                                                                                                                                                                                                                                                                                                                                                                                                                                                                                                                                                                                                                                                                                                                                                                                                                                                                                                                                                                                                                                                                                                                                                                                                                                                                                                                                                                                                                                                                                                                                                                                                                                                                                                                                                                                                                                                                                                                                                                 | 2.5541    | 3.845    | 4.79175  | 6.054          | 9.786          |       |         |       |          |          |       |         |       |          |          |       |         |       |          |          |       |         |        |          |          |       |         |       |          |          |      |        |       |          |          |         |        |       |          |          |         |        |       |          |          |         |         |         |          |          |         |        |        |          |          |         |         |        |          |          |  |      |     |     |     |       |       |         |        |          |       |       |       |         |        |          |        |        |       |          |        |          |       |        |       |          |         |          |       |        |       |          |        |          |       |       |      |        |       |         |       |       |         |         |        |         |       |        |         |        |       |         |       |        |         |           |         |          |        |         |         |           |         |         |        |         |         |           |         |          |        |         |      |    |     |          |          |          |                                                                                                                                                                                                                                                                                                                                                                                                                                                                                                                                                                                                                                                                                                                                                                                                                                                                                                                                                                                                                                                                                                                                                                                                                                                                                                                                                                                                                                                                                                                                                                                                                                                                                                                                                                                                                                                                                                                                                                                                                                                                                                                                                                                                                                                                                                                                                                                                                                                                                                                                                                                                                                                                                                                                                                                                                                                                                                                          |  |      |    |          |                |       |         |       |          |         |       |         |       |          |         |       |         |        |          |         |       |         |        |          |         |       |         |        |          |         |      |        |       |          |         |         |        |       |          |         |         |        |       |          |         |         |         |        |          |         |         |         |        |          |         |         |          |         |          |          |  |      |     |     |     |       |       |        |        |         |       |        |       |         |        |         |        |        |       |         |         |         |       |         |       |         |         |         |        |         |       |         |        |        |        |         |      |       |       |        |       |         |         |        |        |        |       |         |         |        |       |        |       |         |         |          |         |         |        |         |         |          |         |         |        |          |         |          |         |        |         |          |      |    |     |          |          |          |
| beta[2]                                                                                                                                                                                                                                                                                                                                                                                                                                                                                                                                                                                                                                                                                                                                                                                                                                                                                                                                                                                                                                                                                                                                                                                                                                                                                                                                                                                                                                                                                                                                                                                                                                                                                                                                                                                                                                                                                                                                                                                                                                                                                                                                                                                                                                                                                                                                                                                                                                                                                                                                                                                                                                                                                                                                                                                                                                                                                                                              | -9.5725   | -3.685   | 0.75760  | 5.165          | 15.634         |       |         |       |          |          |       |         |       |          |          |       |         |       |          |          |       |         |        |          |          |       |         |       |          |          |      |        |       |          |          |         |        |       |          |          |         |        |       |          |          |         |         |         |          |          |         |        |        |          |          |         |         |        |          |          |  |      |     |     |     |       |       |         |        |          |       |       |       |         |        |          |        |        |       |          |        |          |       |        |       |          |         |          |       |        |       |          |        |          |       |       |      |        |       |         |       |       |         |         |        |         |       |        |         |        |       |         |       |        |         |           |         |          |        |         |         |           |         |         |        |         |         |           |         |          |        |         |      |    |     |          |          |          |                                                                                                                                                                                                                                                                                                                                                                                                                                                                                                                                                                                                                                                                                                                                                                                                                                                                                                                                                                                                                                                                                                                                                                                                                                                                                                                                                                                                                                                                                                                                                                                                                                                                                                                                                                                                                                                                                                                                                                                                                                                                                                                                                                                                                                                                                                                                                                                                                                                                                                                                                                                                                                                                                                                                                                                                                                                                                                                          |  |      |    |          |                |       |         |       |          |         |       |         |       |          |         |       |         |        |          |         |       |         |        |          |         |       |         |        |          |         |      |        |       |          |         |         |        |       |          |         |         |        |       |          |         |         |         |        |          |         |         |         |        |          |         |         |          |         |          |          |  |      |     |     |     |       |       |        |        |         |       |        |       |         |        |         |        |        |       |         |         |         |       |         |       |         |         |         |        |         |       |         |        |        |        |         |      |       |       |        |       |         |         |        |        |        |       |         |         |        |       |        |       |         |         |          |         |         |        |         |         |          |         |         |        |          |         |          |         |        |         |          |      |    |     |          |          |          |
| beta[3]                                                                                                                                                                                                                                                                                                                                                                                                                                                                                                                                                                                                                                                                                                                                                                                                                                                                                                                                                                                                                                                                                                                                                                                                                                                                                                                                                                                                                                                                                                                                                                                                                                                                                                                                                                                                                                                                                                                                                                                                                                                                                                                                                                                                                                                                                                                                                                                                                                                                                                                                                                                                                                                                                                                                                                                                                                                                                                                              | 0.6883    | 4.027    | 6.09224  | 8.475          | 14.021         |       |         |       |          |          |       |         |       |          |          |       |         |       |          |          |       |         |        |          |          |       |         |       |          |          |      |        |       |          |          |         |        |       |          |          |         |        |       |          |          |         |         |         |          |          |         |        |        |          |          |         |         |        |          |          |  |      |     |     |     |       |       |         |        |          |       |       |       |         |        |          |        |        |       |          |        |          |       |        |       |          |         |          |       |        |       |          |        |          |       |       |      |        |       |         |       |       |         |         |        |         |       |        |         |        |       |         |       |        |         |           |         |          |        |         |         |           |         |         |        |         |         |           |         |          |        |         |      |    |     |          |          |          |                                                                                                                                                                                                                                                                                                                                                                                                                                                                                                                                                                                                                                                                                                                                                                                                                                                                                                                                                                                                                                                                                                                                                                                                                                                                                                                                                                                                                                                                                                                                                                                                                                                                                                                                                                                                                                                                                                                                                                                                                                                                                                                                                                                                                                                                                                                                                                                                                                                                                                                                                                                                                                                                                                                                                                                                                                                                                                                          |  |      |    |          |                |       |         |       |          |         |       |         |       |          |         |       |         |        |          |         |       |         |        |          |         |       |         |        |          |         |      |        |       |          |         |         |        |       |          |         |         |        |       |          |         |         |         |        |          |         |         |         |        |          |         |         |          |         |          |          |  |      |     |     |     |       |       |        |        |         |       |        |       |         |        |         |        |        |       |         |         |         |       |         |       |         |         |         |        |         |       |         |        |        |        |         |      |       |       |        |       |         |         |        |        |        |       |         |         |        |       |        |       |         |         |          |         |         |        |         |         |          |         |         |        |          |         |          |         |        |         |          |      |    |     |          |          |          |
| beta[4]                                                                                                                                                                                                                                                                                                                                                                                                                                                                                                                                                                                                                                                                                                                                                                                                                                                                                                                                                                                                                                                                                                                                                                                                                                                                                                                                                                                                                                                                                                                                                                                                                                                                                                                                                                                                                                                                                                                                                                                                                                                                                                                                                                                                                                                                                                                                                                                                                                                                                                                                                                                                                                                                                                                                                                                                                                                                                                                              | -228.5349 | -19.038  | -0.11935 | 18.566         | 212.332        |       |         |       |          |          |       |         |       |          |          |       |         |       |          |          |       |         |        |          |          |       |         |       |          |          |      |        |       |          |          |         |        |       |          |          |         |        |       |          |          |         |         |         |          |          |         |        |        |          |          |         |         |        |          |          |  |      |     |     |     |       |       |         |        |          |       |       |       |         |        |          |        |        |       |          |        |          |       |        |       |          |         |          |       |        |       |          |        |          |       |       |      |        |       |         |       |       |         |         |        |         |       |        |         |        |       |         |       |        |         |           |         |          |        |         |         |           |         |         |        |         |         |           |         |          |        |         |      |    |     |          |          |          |                                                                                                                                                                                                                                                                                                                                                                                                                                                                                                                                                                                                                                                                                                                                                                                                                                                                                                                                                                                                                                                                                                                                                                                                                                                                                                                                                                                                                                                                                                                                                                                                                                                                                                                                                                                                                                                                                                                                                                                                                                                                                                                                                                                                                                                                                                                                                                                                                                                                                                                                                                                                                                                                                                                                                                                                                                                                                                                          |  |      |    |          |                |       |         |       |          |         |       |         |       |          |         |       |         |        |          |         |       |         |        |          |         |       |         |        |          |         |      |        |       |          |         |         |        |       |          |         |         |        |       |          |         |         |         |        |          |         |         |         |        |          |         |         |          |         |          |          |  |      |     |     |     |       |       |        |        |         |       |        |       |         |        |         |        |        |       |         |         |         |       |         |       |         |         |         |        |         |       |         |        |        |        |         |      |       |       |        |       |         |         |        |        |        |       |         |         |        |       |        |       |         |         |          |         |         |        |         |         |          |         |         |        |          |         |          |         |        |         |          |      |    |     |          |          |          |
| beta[5]                                                                                                                                                                                                                                                                                                                                                                                                                                                                                                                                                                                                                                                                                                                                                                                                                                                                                                                                                                                                                                                                                                                                                                                                                                                                                                                                                                                                                                                                                                                                                                                                                                                                                                                                                                                                                                                                                                                                                                                                                                                                                                                                                                                                                                                                                                                                                                                                                                                                                                                                                                                                                                                                                                                                                                                                                                                                                                                              | -154.3489 | -17.769  | 0.04431  | 17.965         | 191.149        |       |         |       |          |          |       |         |       |          |          |       |         |       |          |          |       |         |        |          |          |       |         |       |          |          |      |        |       |          |          |         |        |       |          |          |         |        |       |          |          |         |         |         |          |          |         |        |        |          |          |         |         |        |          |          |  |      |     |     |     |       |       |         |        |          |       |       |       |         |        |          |        |        |       |          |        |          |       |        |       |          |         |          |       |        |       |          |        |          |       |       |      |        |       |         |       |       |         |         |        |         |       |        |         |        |       |         |       |        |         |           |         |          |        |         |         |           |         |         |        |         |         |           |         |          |        |         |      |    |     |          |          |          |                                                                                                                                                                                                                                                                                                                                                                                                                                                                                                                                                                                                                                                                                                                                                                                                                                                                                                                                                                                                                                                                                                                                                                                                                                                                                                                                                                                                                                                                                                                                                                                                                                                                                                                                                                                                                                                                                                                                                                                                                                                                                                                                                                                                                                                                                                                                                                                                                                                                                                                                                                                                                                                                                                                                                                                                                                                                                                                          |  |      |    |          |                |       |         |       |          |         |       |         |       |          |         |       |         |        |          |         |       |         |        |          |         |       |         |        |          |         |      |        |       |          |         |         |        |       |          |         |         |        |       |          |         |         |         |        |          |         |         |         |        |          |         |         |          |         |          |          |  |      |     |     |     |       |       |        |        |         |       |        |       |         |        |         |        |        |       |         |         |         |       |         |       |         |         |         |        |         |       |         |        |        |        |         |      |       |       |        |       |         |         |        |        |        |       |         |         |        |       |        |       |         |         |          |         |         |        |         |         |          |         |         |        |          |         |          |         |        |         |          |      |    |     |          |          |          |
| beta[6]                                                                                                                                                                                                                                                                                                                                                                                                                                                                                                                                                                                                                                                                                                                                                                                                                                                                                                                                                                                                                                                                                                                                                                                                                                                                                                                                                                                                                                                                                                                                                                                                                                                                                                                                                                                                                                                                                                                                                                                                                                                                                                                                                                                                                                                                                                                                                                                                                                                                                                                                                                                                                                                                                                                                                                                                                                                                                                                              | -267.7240 | -21.814  | -1.17367 | 17.775         | 170.818        |       |         |       |          |          |       |         |       |          |          |       |         |       |          |          |       |         |        |          |          |       |         |       |          |          |      |        |       |          |          |         |        |       |          |          |         |        |       |          |          |         |         |         |          |          |         |        |        |          |          |         |         |        |          |          |  |      |     |     |     |       |       |         |        |          |       |       |       |         |        |          |        |        |       |          |        |          |       |        |       |          |         |          |       |        |       |          |        |          |       |       |      |        |       |         |       |       |         |         |        |         |       |        |         |        |       |         |       |        |         |           |         |          |        |         |         |           |         |         |        |         |         |           |         |          |        |         |      |    |     |          |          |          |                                                                                                                                                                                                                                                                                                                                                                                                                                                                                                                                                                                                                                                                                                                                                                                                                                                                                                                                                                                                                                                                                                                                                                                                                                                                                                                                                                                                                                                                                                                                                                                                                                                                                                                                                                                                                                                                                                                                                                                                                                                                                                                                                                                                                                                                                                                                                                                                                                                                                                                                                                                                                                                                                                                                                                                                                                                                                                                          |  |      |    |          |                |       |         |       |          |         |       |         |       |          |         |       |         |        |          |         |       |         |        |          |         |       |         |        |          |         |      |        |       |          |         |         |        |       |          |         |         |        |       |          |         |         |         |        |          |         |         |         |        |          |         |         |          |         |          |          |  |      |     |     |     |       |       |        |        |         |       |        |       |         |        |         |        |        |       |         |         |         |       |         |       |         |         |         |        |         |       |         |        |        |        |         |      |       |       |        |       |         |         |        |        |        |       |         |         |        |       |        |       |         |         |          |         |         |        |         |         |          |         |         |        |          |         |          |         |        |         |          |      |    |     |          |          |          |
| Dbar                                                                                                                                                                                                                                                                                                                                                                                                                                                                                                                                                                                                                                                                                                                                                                                                                                                                                                                                                                                                                                                                                                                                                                                                                                                                                                                                                                                                                                                                                                                                                                                                                                                                                                                                                                                                                                                                                                                                                                                                                                                                                                                                                                                                                                                                                                                                                                                                                                                                                                                                                                                                                                                                                                                                                                                                                                                                                                                                 | pD        | DIC      |          |                |                |       |         |       |          |          |       |         |       |          |          |       |         |       |          |          |       |         |        |          |          |       |         |       |          |          |      |        |       |          |          |         |        |       |          |          |         |        |       |          |          |         |         |         |          |          |         |        |        |          |          |         |         |        |          |          |  |      |     |     |     |       |       |         |        |          |       |       |       |         |        |          |        |        |       |          |        |          |       |        |       |          |         |          |       |        |       |          |        |          |       |       |      |        |       |         |       |       |         |         |        |         |       |        |         |        |       |         |       |        |         |           |         |          |        |         |         |           |         |         |        |         |         |           |         |          |        |         |      |    |     |          |          |          |                                                                                                                                                                                                                                                                                                                                                                                                                                                                                                                                                                                                                                                                                                                                                                                                                                                                                                                                                                                                                                                                                                                                                                                                                                                                                                                                                                                                                                                                                                                                                                                                                                                                                                                                                                                                                                                                                                                                                                                                                                                                                                                                                                                                                                                                                                                                                                                                                                                                                                                                                                                                                                                                                                                                                                                                                                                                                                                          |  |      |    |          |                |       |         |       |          |         |       |         |       |          |         |       |         |        |          |         |       |         |        |          |         |       |         |        |          |         |      |        |       |          |         |         |        |       |          |         |         |        |       |          |         |         |         |        |          |         |         |         |        |          |         |         |          |         |          |          |  |      |     |     |     |       |       |        |        |         |       |        |       |         |        |         |        |        |       |         |         |         |       |         |       |         |         |         |        |         |       |         |        |        |        |         |      |       |       |        |       |         |         |        |        |        |       |         |         |        |       |        |       |         |         |          |         |         |        |         |         |          |         |         |        |          |         |          |         |        |         |          |      |    |     |          |          |          |
| 28.25290                                                                                                                                                                                                                                                                                                                                                                                                                                                                                                                                                                                                                                                                                                                                                                                                                                                                                                                                                                                                                                                                                                                                                                                                                                                                                                                                                                                                                                                                                                                                                                                                                                                                                                                                                                                                                                                                                                                                                                                                                                                                                                                                                                                                                                                                                                                                                                                                                                                                                                                                                                                                                                                                                                                                                                                                                                                                                                                             | 27.27184  | 55.52474 |          |                |                |       |         |       |          |          |       |         |       |          |          |       |         |       |          |          |       |         |        |          |          |       |         |       |          |          |      |        |       |          |          |         |        |       |          |          |         |        |       |          |          |         |         |         |          |          |         |        |        |          |          |         |         |        |          |          |  |      |     |     |     |       |       |         |        |          |       |       |       |         |        |          |        |        |       |          |        |          |       |        |       |          |         |          |       |        |       |          |        |          |       |       |      |        |       |         |       |       |         |         |        |         |       |        |         |        |       |         |       |        |         |           |         |          |        |         |         |           |         |         |        |         |         |           |         |          |        |         |      |    |     |          |          |          |                                                                                                                                                                                                                                                                                                                                                                                                                                                                                                                                                                                                                                                                                                                                                                                                                                                                                                                                                                                                                                                                                                                                                                                                                                                                                                                                                                                                                                                                                                                                                                                                                                                                                                                                                                                                                                                                                                                                                                                                                                                                                                                                                                                                                                                                                                                                                                                                                                                                                                                                                                                                                                                                                                                                                                                                                                                                                                                          |  |      |    |          |                |       |         |       |          |         |       |         |       |          |         |       |         |        |          |         |       |         |        |          |         |       |         |        |          |         |      |        |       |          |         |         |        |       |          |         |         |        |       |          |         |         |         |        |          |         |         |         |        |          |         |         |          |         |          |          |  |      |     |     |     |       |       |        |        |         |       |        |       |         |        |         |        |        |       |         |         |         |       |         |       |         |         |         |        |         |       |         |        |        |        |         |      |       |       |        |       |         |         |        |        |        |       |         |         |        |       |        |       |         |         |          |         |         |        |         |         |          |         |         |        |          |         |          |         |        |         |          |      |    |     |          |          |          |
|                                                                                                                                                                                                                                                                                                                                                                                                                                                                                                                                                                                                                                                                                                                                                                                                                                                                                                                                                                                                                                                                                                                                                                                                                                                                                                                                                                                                                                                                                                                                                                                                                                                                                                                                                                                                                                                                                                                                                                                                                                                                                                                                                                                                                                                                                                                                                                                                                                                                                                                                                                                                                                                                                                                                                                                                                                                                                                                                      | Mean      | SD       | Naive SE | Time-series SE |                |       |         |       |          |          |       |         |       |          |          |       |         |       |          |          |       |         |        |          |          |       |         |       |          |          |      |        |       |          |          |         |        |       |          |          |         |        |       |          |          |         |         |         |          |          |         |        |        |          |          |         |         |        |          |          |  |      |     |     |     |       |       |         |        |          |       |       |       |         |        |          |        |        |       |          |        |          |       |        |       |          |         |          |       |        |       |          |        |          |       |       |      |        |       |         |       |       |         |         |        |         |       |        |         |        |       |         |       |        |         |           |         |          |        |         |         |           |         |         |        |         |         |           |         |          |        |         |      |    |     |          |          |          |                                                                                                                                                                                                                                                                                                                                                                                                                                                                                                                                                                                                                                                                                                                                                                                                                                                                                                                                                                                                                                                                                                                                                                                                                                                                                                                                                                                                                                                                                                                                                                                                                                                                                                                                                                                                                                                                                                                                                                                                                                                                                                                                                                                                                                                                                                                                                                                                                                                                                                                                                                                                                                                                                                                                                                                                                                                                                                                          |  |      |    |          |                |       |         |       |          |         |       |         |       |          |         |       |         |        |          |         |       |         |        |          |         |       |         |        |          |         |      |        |       |          |         |         |        |       |          |         |         |        |       |          |         |         |         |        |          |         |         |         |        |          |         |         |          |         |          |          |  |      |     |     |     |       |       |        |        |         |       |        |       |         |        |         |        |        |       |         |         |         |       |         |       |         |         |         |        |         |       |         |        |        |        |         |      |       |       |        |       |         |         |        |        |        |       |         |         |        |       |        |       |         |         |          |         |         |        |         |         |          |         |         |        |          |         |          |         |        |         |          |      |    |     |          |          |          |
| d.1.2                                                                                                                                                                                                                                                                                                                                                                                                                                                                                                                                                                                                                                                                                                                                                                                                                                                                                                                                                                                                                                                                                                                                                                                                                                                                                                                                                                                                                                                                                                                                                                                                                                                                                                                                                                                                                                                                                                                                                                                                                                                                                                                                                                                                                                                                                                                                                                                                                                                                                                                                                                                                                                                                                                                                                                                                                                                                                                                                | -0.7493   | 3.604    | 0.008059 | 0.04618        |                |       |         |       |          |          |       |         |       |          |          |       |         |       |          |          |       |         |        |          |          |       |         |       |          |          |      |        |       |          |          |         |        |       |          |          |         |        |       |          |          |         |         |         |          |          |         |        |        |          |          |         |         |        |          |          |  |      |     |     |     |       |       |         |        |          |       |       |       |         |        |          |        |        |       |          |        |          |       |        |       |          |         |          |       |        |       |          |        |          |       |       |      |        |       |         |       |       |         |         |        |         |       |        |         |        |       |         |       |        |         |           |         |          |        |         |         |           |         |         |        |         |         |           |         |          |        |         |      |    |     |          |          |          |                                                                                                                                                                                                                                                                                                                                                                                                                                                                                                                                                                                                                                                                                                                                                                                                                                                                                                                                                                                                                                                                                                                                                                                                                                                                                                                                                                                                                                                                                                                                                                                                                                                                                                                                                                                                                                                                                                                                                                                                                                                                                                                                                                                                                                                                                                                                                                                                                                                                                                                                                                                                                                                                                                                                                                                                                                                                                                                          |  |      |    |          |                |       |         |       |          |         |       |         |       |          |         |       |         |        |          |         |       |         |        |          |         |       |         |        |          |         |      |        |       |          |         |         |        |       |          |         |         |        |       |          |         |         |         |        |          |         |         |         |        |          |         |         |          |         |          |          |  |      |     |     |     |       |       |        |        |         |       |        |       |         |        |         |        |        |       |         |         |         |       |         |       |         |         |         |        |         |       |         |        |        |        |         |      |       |       |        |       |         |         |        |        |        |       |         |         |        |       |        |       |         |         |          |         |         |        |         |         |          |         |         |        |          |         |          |         |        |         |          |      |    |     |          |          |          |
| d.1.3                                                                                                                                                                                                                                                                                                                                                                                                                                                                                                                                                                                                                                                                                                                                                                                                                                                                                                                                                                                                                                                                                                                                                                                                                                                                                                                                                                                                                                                                                                                                                                                                                                                                                                                                                                                                                                                                                                                                                                                                                                                                                                                                                                                                                                                                                                                                                                                                                                                                                                                                                                                                                                                                                                                                                                                                                                                                                                                                | -4.5065   | 2.610    | 0.005835 | 0.03069        |                |       |         |       |          |          |       |         |       |          |          |       |         |       |          |          |       |         |        |          |          |       |         |       |          |          |      |        |       |          |          |         |        |       |          |          |         |        |       |          |          |         |         |         |          |          |         |        |        |          |          |         |         |        |          |          |  |      |     |     |     |       |       |         |        |          |       |       |       |         |        |          |        |        |       |          |        |          |       |        |       |          |         |          |       |        |       |          |        |          |       |       |      |        |       |         |       |       |         |         |        |         |       |        |         |        |       |         |       |        |         |           |         |          |        |         |         |           |         |         |        |         |         |           |         |          |        |         |      |    |     |          |          |          |                                                                                                                                                                                                                                                                                                                                                                                                                                                                                                                                                                                                                                                                                                                                                                                                                                                                                                                                                                                                                                                                                                                                                                                                                                                                                                                                                                                                                                                                                                                                                                                                                                                                                                                                                                                                                                                                                                                                                                                                                                                                                                                                                                                                                                                                                                                                                                                                                                                                                                                                                                                                                                                                                                                                                                                                                                                                                                                          |  |      |    |          |                |       |         |       |          |         |       |         |       |          |         |       |         |        |          |         |       |         |        |          |         |       |         |        |          |         |      |        |       |          |         |         |        |       |          |         |         |        |       |          |         |         |         |        |          |         |         |         |        |          |         |         |          |         |          |          |  |      |     |     |     |       |       |        |        |         |       |        |       |         |        |         |        |        |       |         |         |         |       |         |       |         |         |         |        |         |       |         |        |        |        |         |      |       |       |        |       |         |         |        |        |        |       |         |         |        |       |        |       |         |         |          |         |         |        |         |         |          |         |         |        |          |         |          |         |        |         |          |      |    |     |          |          |          |
| d.1.4                                                                                                                                                                                                                                                                                                                                                                                                                                                                                                                                                                                                                                                                                                                                                                                                                                                                                                                                                                                                                                                                                                                                                                                                                                                                                                                                                                                                                                                                                                                                                                                                                                                                                                                                                                                                                                                                                                                                                                                                                                                                                                                                                                                                                                                                                                                                                                                                                                                                                                                                                                                                                                                                                                                                                                                                                                                                                                                                | -3.8149   | 27.144   | 0.060695 | 2.68218        |                |       |         |       |          |          |       |         |       |          |          |       |         |       |          |          |       |         |        |          |          |       |         |       |          |          |      |        |       |          |          |         |        |       |          |          |         |        |       |          |          |         |         |         |          |          |         |        |        |          |          |         |         |        |          |          |  |      |     |     |     |       |       |         |        |          |       |       |       |         |        |          |        |        |       |          |        |          |       |        |       |          |         |          |       |        |       |          |        |          |       |       |      |        |       |         |       |       |         |         |        |         |       |        |         |        |       |         |       |        |         |           |         |          |        |         |         |           |         |         |        |         |         |           |         |          |        |         |      |    |     |          |          |          |                                                                                                                                                                                                                                                                                                                                                                                                                                                                                                                                                                                                                                                                                                                                                                                                                                                                                                                                                                                                                                                                                                                                                                                                                                                                                                                                                                                                                                                                                                                                                                                                                                                                                                                                                                                                                                                                                                                                                                                                                                                                                                                                                                                                                                                                                                                                                                                                                                                                                                                                                                                                                                                                                                                                                                                                                                                                                                                          |  |      |    |          |                |       |         |       |          |         |       |         |       |          |         |       |         |        |          |         |       |         |        |          |         |       |         |        |          |         |      |        |       |          |         |         |        |       |          |         |         |        |       |          |         |         |         |        |          |         |         |         |        |          |         |         |          |         |          |          |  |      |     |     |     |       |       |        |        |         |       |        |       |         |        |         |        |        |       |         |         |         |       |         |       |         |         |         |        |         |       |         |        |        |        |         |      |       |       |        |       |         |         |        |        |        |       |         |         |        |       |        |       |         |         |          |         |         |        |         |         |          |         |         |        |          |         |          |         |        |         |          |      |    |     |          |          |          |
| d.1.5                                                                                                                                                                                                                                                                                                                                                                                                                                                                                                                                                                                                                                                                                                                                                                                                                                                                                                                                                                                                                                                                                                                                                                                                                                                                                                                                                                                                                                                                                                                                                                                                                                                                                                                                                                                                                                                                                                                                                                                                                                                                                                                                                                                                                                                                                                                                                                                                                                                                                                                                                                                                                                                                                                                                                                                                                                                                                                                                | -3.2766   | 40.382   | 0.090298 | 2.07924        |                |       |         |       |          |          |       |         |       |          |          |       |         |       |          |          |       |         |        |          |          |       |         |       |          |          |      |        |       |          |          |         |        |       |          |          |         |        |       |          |          |         |         |         |          |          |         |        |        |          |          |         |         |        |          |          |  |      |     |     |     |       |       |         |        |          |       |       |       |         |        |          |        |        |       |          |        |          |       |        |       |          |         |          |       |        |       |          |        |          |       |       |      |        |       |         |       |       |         |         |        |         |       |        |         |        |       |         |       |        |         |           |         |          |        |         |         |           |         |         |        |         |         |           |         |          |        |         |      |    |     |          |          |          |                                                                                                                                                                                                                                                                                                                                                                                                                                                                                                                                                                                                                                                                                                                                                                                                                                                                                                                                                                                                                                                                                                                                                                                                                                                                                                                                                                                                                                                                                                                                                                                                                                                                                                                                                                                                                                                                                                                                                                                                                                                                                                                                                                                                                                                                                                                                                                                                                                                                                                                                                                                                                                                                                                                                                                                                                                                                                                                          |  |      |    |          |                |       |         |       |          |         |       |         |       |          |         |       |         |        |          |         |       |         |        |          |         |       |         |        |          |         |      |        |       |          |         |         |        |       |          |         |         |        |       |          |         |         |         |        |          |         |         |         |        |          |         |         |          |         |          |          |  |      |     |     |     |       |       |        |        |         |       |        |       |         |        |         |        |        |       |         |         |         |       |         |       |         |         |         |        |         |       |         |        |        |        |         |      |       |       |        |       |         |         |        |        |        |       |         |         |        |       |        |       |         |         |          |         |         |        |         |         |          |         |         |        |          |         |          |         |        |         |          |      |    |     |          |          |          |
| d.1.6                                                                                                                                                                                                                                                                                                                                                                                                                                                                                                                                                                                                                                                                                                                                                                                                                                                                                                                                                                                                                                                                                                                                                                                                                                                                                                                                                                                                                                                                                                                                                                                                                                                                                                                                                                                                                                                                                                                                                                                                                                                                                                                                                                                                                                                                                                                                                                                                                                                                                                                                                                                                                                                                                                                                                                                                                                                                                                                                | 12.8579   | 29.130   | 0.065137 | 2.12090        |                |       |         |       |          |          |       |         |       |          |          |       |         |       |          |          |       |         |        |          |          |       |         |       |          |          |      |        |       |          |          |         |        |       |          |          |         |        |       |          |          |         |         |         |          |          |         |        |        |          |          |         |         |        |          |          |  |      |     |     |     |       |       |         |        |          |       |       |       |         |        |          |        |        |       |          |        |          |       |        |       |          |         |          |       |        |       |          |        |          |       |       |      |        |       |         |       |       |         |         |        |         |       |        |         |        |       |         |       |        |         |           |         |          |        |         |         |           |         |         |        |         |         |           |         |          |        |         |      |    |     |          |          |          |                                                                                                                                                                                                                                                                                                                                                                                                                                                                                                                                                                                                                                                                                                                                                                                                                                                                                                                                                                                                                                                                                                                                                                                                                                                                                                                                                                                                                                                                                                                                                                                                                                                                                                                                                                                                                                                                                                                                                                                                                                                                                                                                                                                                                                                                                                                                                                                                                                                                                                                                                                                                                                                                                                                                                                                                                                                                                                                          |  |      |    |          |                |       |         |       |          |         |       |         |       |          |         |       |         |        |          |         |       |         |        |          |         |       |         |        |          |         |      |        |       |          |         |         |        |       |          |         |         |        |       |          |         |         |         |        |          |         |         |         |        |          |         |         |          |         |          |          |  |      |     |     |     |       |       |        |        |         |       |        |       |         |        |         |        |        |       |         |         |         |       |         |       |         |         |         |        |         |       |         |        |        |        |         |      |       |       |        |       |         |         |        |        |        |       |         |         |        |       |        |       |         |         |          |         |         |        |         |         |          |         |         |        |          |         |          |         |        |         |          |      |    |     |          |          |          |
| sd.d                                                                                                                                                                                                                                                                                                                                                                                                                                                                                                                                                                                                                                                                                                                                                                                                                                                                                                                                                                                                                                                                                                                                                                                                                                                                                                                                                                                                                                                                                                                                                                                                                                                                                                                                                                                                                                                                                                                                                                                                                                                                                                                                                                                                                                                                                                                                                                                                                                                                                                                                                                                                                                                                                                                                                                                                                                                                                                                                 | 5.7165    | 2.323    | 0.005194 | 0.05207        |                |       |         |       |          |          |       |         |       |          |          |       |         |       |          |          |       |         |        |          |          |       |         |       |          |          |      |        |       |          |          |         |        |       |          |          |         |        |       |          |          |         |         |         |          |          |         |        |        |          |          |         |         |        |          |          |  |      |     |     |     |       |       |         |        |          |       |       |       |         |        |          |        |        |       |          |        |          |       |        |       |          |         |          |       |        |       |          |        |          |       |       |      |        |       |         |       |       |         |         |        |         |       |        |         |        |       |         |       |        |         |           |         |          |        |         |         |           |         |         |        |         |         |           |         |          |        |         |      |    |     |          |          |          |                                                                                                                                                                                                                                                                                                                                                                                                                                                                                                                                                                                                                                                                                                                                                                                                                                                                                                                                                                                                                                                                                                                                                                                                                                                                                                                                                                                                                                                                                                                                                                                                                                                                                                                                                                                                                                                                                                                                                                                                                                                                                                                                                                                                                                                                                                                                                                                                                                                                                                                                                                                                                                                                                                                                                                                                                                                                                                                          |  |      |    |          |                |       |         |       |          |         |       |         |       |          |         |       |         |        |          |         |       |         |        |          |         |       |         |        |          |         |      |        |       |          |         |         |        |       |          |         |         |        |       |          |         |         |         |        |          |         |         |         |        |          |         |         |          |         |          |          |  |      |     |     |     |       |       |        |        |         |       |        |       |         |        |         |        |        |       |         |         |         |       |         |       |         |         |         |        |         |       |         |        |        |        |         |      |       |       |        |       |         |         |        |        |        |       |         |         |        |       |        |       |         |         |          |         |         |        |         |         |          |         |         |        |          |         |          |         |        |         |          |      |    |     |          |          |          |
| beta[2]                                                                                                                                                                                                                                                                                                                                                                                                                                                                                                                                                                                                                                                                                                                                                                                                                                                                                                                                                                                                                                                                                                                                                                                                                                                                                                                                                                                                                                                                                                                                                                                                                                                                                                                                                                                                                                                                                                                                                                                                                                                                                                                                                                                                                                                                                                                                                                                                                                                                                                                                                                                                                                                                                                                                                                                                                                                                                                                              | 1.5202    | 6.144    | 0.013739 | 2.05077        |                |       |         |       |          |          |       |         |       |          |          |       |         |       |          |          |       |         |        |          |          |       |         |       |          |          |      |        |       |          |          |         |        |       |          |          |         |        |       |          |          |         |         |         |          |          |         |        |        |          |          |         |         |        |          |          |  |      |     |     |     |       |       |         |        |          |       |       |       |         |        |          |        |        |       |          |        |          |       |        |       |          |         |          |       |        |       |          |        |          |       |       |      |        |       |         |       |       |         |         |        |         |       |        |         |        |       |         |       |        |         |           |         |          |        |         |         |           |         |         |        |         |         |           |         |          |        |         |      |    |     |          |          |          |                                                                                                                                                                                                                                                                                                                                                                                                                                                                                                                                                                                                                                                                                                                                                                                                                                                                                                                                                                                                                                                                                                                                                                                                                                                                                                                                                                                                                                                                                                                                                                                                                                                                                                                                                                                                                                                                                                                                                                                                                                                                                                                                                                                                                                                                                                                                                                                                                                                                                                                                                                                                                                                                                                                                                                                                                                                                                                                          |  |      |    |          |                |       |         |       |          |         |       |         |       |          |         |       |         |        |          |         |       |         |        |          |         |       |         |        |          |         |      |        |       |          |         |         |        |       |          |         |         |        |       |          |         |         |         |        |          |         |         |         |        |          |         |         |          |         |          |          |  |      |     |     |     |       |       |        |        |         |       |        |       |         |        |         |        |        |       |         |         |         |       |         |       |         |         |         |        |         |       |         |        |        |        |         |      |       |       |        |       |         |         |        |        |        |       |         |         |        |       |        |       |         |         |          |         |         |        |         |         |          |         |         |        |          |         |          |         |        |         |          |      |    |     |          |          |          |
| beta[3]                                                                                                                                                                                                                                                                                                                                                                                                                                                                                                                                                                                                                                                                                                                                                                                                                                                                                                                                                                                                                                                                                                                                                                                                                                                                                                                                                                                                                                                                                                                                                                                                                                                                                                                                                                                                                                                                                                                                                                                                                                                                                                                                                                                                                                                                                                                                                                                                                                                                                                                                                                                                                                                                                                                                                                                                                                                                                                                              | 4.5842    | 5.407    | 0.012091 | 0.60388        |                |       |         |       |          |          |       |         |       |          |          |       |         |       |          |          |       |         |        |          |          |       |         |       |          |          |      |        |       |          |          |         |        |       |          |          |         |        |       |          |          |         |         |         |          |          |         |        |        |          |          |         |         |        |          |          |  |      |     |     |     |       |       |         |        |          |       |       |       |         |        |          |        |        |       |          |        |          |       |        |       |          |         |          |       |        |       |          |        |          |       |       |      |        |       |         |       |       |         |         |        |         |       |        |         |        |       |         |       |        |         |           |         |          |        |         |         |           |         |         |        |         |         |           |         |          |        |         |      |    |     |          |          |          |                                                                                                                                                                                                                                                                                                                                                                                                                                                                                                                                                                                                                                                                                                                                                                                                                                                                                                                                                                                                                                                                                                                                                                                                                                                                                                                                                                                                                                                                                                                                                                                                                                                                                                                                                                                                                                                                                                                                                                                                                                                                                                                                                                                                                                                                                                                                                                                                                                                                                                                                                                                                                                                                                                                                                                                                                                                                                                                          |  |      |    |          |                |       |         |       |          |         |       |         |       |          |         |       |         |        |          |         |       |         |        |          |         |       |         |        |          |         |      |        |       |          |         |         |        |       |          |         |         |        |       |          |         |         |         |        |          |         |         |         |        |          |         |         |          |         |          |          |  |      |     |     |     |       |       |        |        |         |       |        |       |         |        |         |        |        |       |         |         |         |       |         |       |         |         |         |        |         |       |         |        |        |        |         |      |       |       |        |       |         |         |        |        |        |       |         |         |        |       |        |       |         |         |          |         |         |        |         |         |          |         |         |        |          |         |          |         |        |         |          |      |    |     |          |          |          |
| beta[4]                                                                                                                                                                                                                                                                                                                                                                                                                                                                                                                                                                                                                                                                                                                                                                                                                                                                                                                                                                                                                                                                                                                                                                                                                                                                                                                                                                                                                                                                                                                                                                                                                                                                                                                                                                                                                                                                                                                                                                                                                                                                                                                                                                                                                                                                                                                                                                                                                                                                                                                                                                                                                                                                                                                                                                                                                                                                                                                              | -4.7028   | 54.476   | 0.121812 | 5.60773        |                |       |         |       |          |          |       |         |       |          |          |       |         |       |          |          |       |         |        |          |          |       |         |       |          |          |      |        |       |          |          |         |        |       |          |          |         |        |       |          |          |         |         |         |          |          |         |        |        |          |          |         |         |        |          |          |  |      |     |     |     |       |       |         |        |          |       |       |       |         |        |          |        |        |       |          |        |          |       |        |       |          |         |          |       |        |       |          |        |          |       |       |      |        |       |         |       |       |         |         |        |         |       |        |         |        |       |         |       |        |         |           |         |          |        |         |         |           |         |         |        |         |         |           |         |          |        |         |      |    |     |          |          |          |                                                                                                                                                                                                                                                                                                                                                                                                                                                                                                                                                                                                                                                                                                                                                                                                                                                                                                                                                                                                                                                                                                                                                                                                                                                                                                                                                                                                                                                                                                                                                                                                                                                                                                                                                                                                                                                                                                                                                                                                                                                                                                                                                                                                                                                                                                                                                                                                                                                                                                                                                                                                                                                                                                                                                                                                                                                                                                                          |  |      |    |          |                |       |         |       |          |         |       |         |       |          |         |       |         |        |          |         |       |         |        |          |         |       |         |        |          |         |      |        |       |          |         |         |        |       |          |         |         |        |       |          |         |         |         |        |          |         |         |         |        |          |         |         |          |         |          |          |  |      |     |     |     |       |       |        |        |         |       |        |       |         |        |         |        |        |       |         |         |         |       |         |       |         |         |         |        |         |       |         |        |        |        |         |      |       |       |        |       |         |         |        |        |        |       |         |         |        |       |        |       |         |         |          |         |         |        |         |         |          |         |         |        |          |         |          |         |        |         |          |      |    |     |          |          |          |
| beta[5]                                                                                                                                                                                                                                                                                                                                                                                                                                                                                                                                                                                                                                                                                                                                                                                                                                                                                                                                                                                                                                                                                                                                                                                                                                                                                                                                                                                                                                                                                                                                                                                                                                                                                                                                                                                                                                                                                                                                                                                                                                                                                                                                                                                                                                                                                                                                                                                                                                                                                                                                                                                                                                                                                                                                                                                                                                                                                                                              | -0.2878   | 60.649   | 0.135616 | 3.13102        |                |       |         |       |          |          |       |         |       |          |          |       |         |       |          |          |       |         |        |          |          |       |         |       |          |          |      |        |       |          |          |         |        |       |          |          |         |        |       |          |          |         |         |         |          |          |         |        |        |          |          |         |         |        |          |          |  |      |     |     |     |       |       |         |        |          |       |       |       |         |        |          |        |        |       |          |        |          |       |        |       |          |         |          |       |        |       |          |        |          |       |       |      |        |       |         |       |       |         |         |        |         |       |        |         |        |       |         |       |        |         |           |         |          |        |         |         |           |         |         |        |         |         |           |         |          |        |         |      |    |     |          |          |          |                                                                                                                                                                                                                                                                                                                                                                                                                                                                                                                                                                                                                                                                                                                                                                                                                                                                                                                                                                                                                                                                                                                                                                                                                                                                                                                                                                                                                                                                                                                                                                                                                                                                                                                                                                                                                                                                                                                                                                                                                                                                                                                                                                                                                                                                                                                                                                                                                                                                                                                                                                                                                                                                                                                                                                                                                                                                                                                          |  |      |    |          |                |       |         |       |          |         |       |         |       |          |         |       |         |        |          |         |       |         |        |          |         |       |         |        |          |         |      |        |       |          |         |         |        |       |          |         |         |        |       |          |         |         |         |        |          |         |         |         |        |          |         |         |          |         |          |          |  |      |     |     |     |       |       |        |        |         |       |        |       |         |        |         |        |        |       |         |         |         |       |         |       |         |         |         |        |         |       |         |        |        |        |         |      |       |       |        |       |         |         |        |        |        |       |         |         |        |       |        |       |         |         |          |         |         |        |         |         |          |         |         |        |          |         |          |         |        |         |          |      |    |     |          |          |          |
| beta[6]                                                                                                                                                                                                                                                                                                                                                                                                                                                                                                                                                                                                                                                                                                                                                                                                                                                                                                                                                                                                                                                                                                                                                                                                                                                                                                                                                                                                                                                                                                                                                                                                                                                                                                                                                                                                                                                                                                                                                                                                                                                                                                                                                                                                                                                                                                                                                                                                                                                                                                                                                                                                                                                                                                                                                                                                                                                                                                                              | 138.4542  | 265.517  | 0.593713 | 24.50683       |                |       |         |       |          |          |       |         |       |          |          |       |         |       |          |          |       |         |        |          |          |       |         |       |          |          |      |        |       |          |          |         |        |       |          |          |         |        |       |          |          |         |         |         |          |          |         |        |        |          |          |         |         |        |          |          |  |      |     |     |     |       |       |         |        |          |       |       |       |         |        |          |        |        |       |          |        |          |       |        |       |          |         |          |       |        |       |          |        |          |       |       |      |        |       |         |       |       |         |         |        |         |       |        |         |        |       |         |       |        |         |           |         |          |        |         |         |           |         |         |        |         |         |           |         |          |        |         |      |    |     |          |          |          |                                                                                                                                                                                                                                                                                                                                                                                                                                                                                                                                                                                                                                                                                                                                                                                                                                                                                                                                                                                                                                                                                                                                                                                                                                                                                                                                                                                                                                                                                                                                                                                                                                                                                                                                                                                                                                                                                                                                                                                                                                                                                                                                                                                                                                                                                                                                                                                                                                                                                                                                                                                                                                                                                                                                                                                                                                                                                                                          |  |      |    |          |                |       |         |       |          |         |       |         |       |          |         |       |         |        |          |         |       |         |        |          |         |       |         |        |          |         |      |        |       |          |         |         |        |       |          |         |         |        |       |          |         |         |         |        |          |         |         |         |        |          |         |         |          |         |          |          |  |      |     |     |     |       |       |        |        |         |       |        |       |         |        |         |        |        |       |         |         |         |       |         |       |         |         |         |        |         |       |         |        |        |        |         |      |       |       |        |       |         |         |        |        |        |       |         |         |        |       |        |       |         |         |          |         |         |        |         |         |          |         |         |        |          |         |          |         |        |         |          |      |    |     |          |          |          |
|                                                                                                                                                                                                                                                                                                                                                                                                                                                                                                                                                                                                                                                                                                                                                                                                                                                                                                                                                                                                                                                                                                                                                                                                                                                                                                                                                                                                                                                                                                                                                                                                                                                                                                                                                                                                                                                                                                                                                                                                                                                                                                                                                                                                                                                                                                                                                                                                                                                                                                                                                                                                                                                                                                                                                                                                                                                                                                                                      | 2.5%      | 25%      | 50%      | 75%            | 97.5%          |       |         |       |          |          |       |         |       |          |          |       |         |       |          |          |       |         |        |          |          |       |         |       |          |          |      |        |       |          |          |         |        |       |          |          |         |        |       |          |          |         |         |         |          |          |         |        |        |          |          |         |         |        |          |          |  |      |     |     |     |       |       |         |        |          |       |       |       |         |        |          |        |        |       |          |        |          |       |        |       |          |         |          |       |        |       |          |        |          |       |       |      |        |       |         |       |       |         |         |        |         |       |        |         |        |       |         |       |        |         |           |         |          |        |         |         |           |         |         |        |         |         |           |         |          |        |         |      |    |     |          |          |          |                                                                                                                                                                                                                                                                                                                                                                                                                                                                                                                                                                                                                                                                                                                                                                                                                                                                                                                                                                                                                                                                                                                                                                                                                                                                                                                                                                                                                                                                                                                                                                                                                                                                                                                                                                                                                                                                                                                                                                                                                                                                                                                                                                                                                                                                                                                                                                                                                                                                                                                                                                                                                                                                                                                                                                                                                                                                                                                          |  |      |    |          |                |       |         |       |          |         |       |         |       |          |         |       |         |        |          |         |       |         |        |          |         |       |         |        |          |         |      |        |       |          |         |         |        |       |          |         |         |        |       |          |         |         |         |        |          |         |         |         |        |          |         |         |          |         |          |          |  |      |     |     |     |       |       |        |        |         |       |        |       |         |        |         |        |        |       |         |         |         |       |         |       |         |         |         |        |         |       |         |        |        |        |         |      |       |       |        |       |         |         |        |        |        |       |         |         |        |       |        |       |         |         |          |         |         |        |         |         |          |         |         |        |          |         |          |         |        |         |          |      |    |     |          |          |          |
| d.1.2                                                                                                                                                                                                                                                                                                                                                                                                                                                                                                                                                                                                                                                                                                                                                                                                                                                                                                                                                                                                                                                                                                                                                                                                                                                                                                                                                                                                                                                                                                                                                                                                                                                                                                                                                                                                                                                                                                                                                                                                                                                                                                                                                                                                                                                                                                                                                                                                                                                                                                                                                                                                                                                                                                                                                                                                                                                                                                                                | -8.686    | -2.655   | -0.6072  | 1.362          | 6.0932         |       |         |       |          |          |       |         |       |          |          |       |         |       |          |          |       |         |        |          |          |       |         |       |          |          |      |        |       |          |          |         |        |       |          |          |         |        |       |          |          |         |         |         |          |          |         |        |        |          |          |         |         |        |          |          |  |      |     |     |     |       |       |         |        |          |       |       |       |         |        |          |        |        |       |          |        |          |       |        |       |          |         |          |       |        |       |          |        |          |       |       |      |        |       |         |       |       |         |         |        |         |       |        |         |        |       |         |       |        |         |           |         |          |        |         |         |           |         |         |        |         |         |           |         |          |        |         |      |    |     |          |          |          |                                                                                                                                                                                                                                                                                                                                                                                                                                                                                                                                                                                                                                                                                                                                                                                                                                                                                                                                                                                                                                                                                                                                                                                                                                                                                                                                                                                                                                                                                                                                                                                                                                                                                                                                                                                                                                                                                                                                                                                                                                                                                                                                                                                                                                                                                                                                                                                                                                                                                                                                                                                                                                                                                                                                                                                                                                                                                                                          |  |      |    |          |                |       |         |       |          |         |       |         |       |          |         |       |         |        |          |         |       |         |        |          |         |       |         |        |          |         |      |        |       |          |         |         |        |       |          |         |         |        |       |          |         |         |         |        |          |         |         |         |        |          |         |         |          |         |          |          |  |      |     |     |     |       |       |        |        |         |       |        |       |         |        |         |        |        |       |         |         |         |       |         |       |         |         |         |        |         |       |         |        |        |        |         |      |       |       |        |       |         |         |        |        |        |       |         |         |        |       |        |       |         |         |          |         |         |        |         |         |          |         |         |        |          |         |          |         |        |         |          |      |    |     |          |          |          |
| d.1.3                                                                                                                                                                                                                                                                                                                                                                                                                                                                                                                                                                                                                                                                                                                                                                                                                                                                                                                                                                                                                                                                                                                                                                                                                                                                                                                                                                                                                                                                                                                                                                                                                                                                                                                                                                                                                                                                                                                                                                                                                                                                                                                                                                                                                                                                                                                                                                                                                                                                                                                                                                                                                                                                                                                                                                                                                                                                                                                                | -10.130   | -5.987   | -4.3506  | -2.880         | 0.3141         |       |         |       |          |          |       |         |       |          |          |       |         |       |          |          |       |         |        |          |          |       |         |       |          |          |      |        |       |          |          |         |        |       |          |          |         |        |       |          |          |         |         |         |          |          |         |        |        |          |          |         |         |        |          |          |  |      |     |     |     |       |       |         |        |          |       |       |       |         |        |          |        |        |       |          |        |          |       |        |       |          |         |          |       |        |       |          |        |          |       |       |      |        |       |         |       |       |         |         |        |         |       |        |         |        |       |         |       |        |         |           |         |          |        |         |         |           |         |         |        |         |         |           |         |          |        |         |      |    |     |          |          |          |                                                                                                                                                                                                                                                                                                                                                                                                                                                                                                                                                                                                                                                                                                                                                                                                                                                                                                                                                                                                                                                                                                                                                                                                                                                                                                                                                                                                                                                                                                                                                                                                                                                                                                                                                                                                                                                                                                                                                                                                                                                                                                                                                                                                                                                                                                                                                                                                                                                                                                                                                                                                                                                                                                                                                                                                                                                                                                                          |  |      |    |          |                |       |         |       |          |         |       |         |       |          |         |       |         |        |          |         |       |         |        |          |         |       |         |        |          |         |      |        |       |          |         |         |        |       |          |         |         |        |       |          |         |         |         |        |          |         |         |         |        |          |         |         |          |         |          |          |  |      |     |     |     |       |       |        |        |         |       |        |       |         |        |         |        |        |       |         |         |         |       |         |       |         |         |         |        |         |       |         |        |        |        |         |      |       |       |        |       |         |         |        |        |        |       |         |         |        |       |        |       |         |         |          |         |         |        |         |         |          |         |         |        |          |         |          |         |        |         |          |      |    |     |          |          |          |
| d.1.4                                                                                                                                                                                                                                                                                                                                                                                                                                                                                                                                                                                                                                                                                                                                                                                                                                                                                                                                                                                                                                                                                                                                                                                                                                                                                                                                                                                                                                                                                                                                                                                                                                                                                                                                                                                                                                                                                                                                                                                                                                                                                                                                                                                                                                                                                                                                                                                                                                                                                                                                                                                                                                                                                                                                                                                                                                                                                                                                | -60.461   | -11.926  | -2.1137  | 7.443          | 44.4534        |       |         |       |          |          |       |         |       |          |          |       |         |       |          |          |       |         |        |          |          |       |         |       |          |          |      |        |       |          |          |         |        |       |          |          |         |        |       |          |          |         |         |         |          |          |         |        |        |          |          |         |         |        |          |          |  |      |     |     |     |       |       |         |        |          |       |       |       |         |        |          |        |        |       |          |        |          |       |        |       |          |         |          |       |        |       |          |        |          |       |       |      |        |       |         |       |       |         |         |        |         |       |        |         |        |       |         |       |        |         |           |         |          |        |         |         |           |         |         |        |         |         |           |         |          |        |         |      |    |     |          |          |          |                                                                                                                                                                                                                                                                                                                                                                                                                                                                                                                                                                                                                                                                                                                                                                                                                                                                                                                                                                                                                                                                                                                                                                                                                                                                                                                                                                                                                                                                                                                                                                                                                                                                                                                                                                                                                                                                                                                                                                                                                                                                                                                                                                                                                                                                                                                                                                                                                                                                                                                                                                                                                                                                                                                                                                                                                                                                                                                          |  |      |    |          |                |       |         |       |          |         |       |         |       |          |         |       |         |        |          |         |       |         |        |          |         |       |         |        |          |         |      |        |       |          |         |         |        |       |          |         |         |        |       |          |         |         |         |        |          |         |         |         |        |          |         |         |          |         |          |          |  |      |     |     |     |       |       |        |        |         |       |        |       |         |        |         |        |        |       |         |         |         |       |         |       |         |         |         |        |         |       |         |        |        |        |         |      |       |       |        |       |         |         |        |        |        |       |         |         |        |       |        |       |         |         |          |         |         |        |         |         |          |         |         |        |          |         |          |         |        |         |          |      |    |     |          |          |          |
| d.1.5                                                                                                                                                                                                                                                                                                                                                                                                                                                                                                                                                                                                                                                                                                                                                                                                                                                                                                                                                                                                                                                                                                                                                                                                                                                                                                                                                                                                                                                                                                                                                                                                                                                                                                                                                                                                                                                                                                                                                                                                                                                                                                                                                                                                                                                                                                                                                                                                                                                                                                                                                                                                                                                                                                                                                                                                                                                                                                                                | -97.842   | -17.881  | -3.1702  | 11.867         | 86.9248        |       |         |       |          |          |       |         |       |          |          |       |         |       |          |          |       |         |        |          |          |       |         |       |          |          |      |        |       |          |          |         |        |       |          |          |         |        |       |          |          |         |         |         |          |          |         |        |        |          |          |         |         |        |          |          |  |      |     |     |     |       |       |         |        |          |       |       |       |         |        |          |        |        |       |          |        |          |       |        |       |          |         |          |       |        |       |          |        |          |       |       |      |        |       |         |       |       |         |         |        |         |       |        |         |        |       |         |       |        |         |           |         |          |        |         |         |           |         |         |        |         |         |           |         |          |        |         |      |    |     |          |          |          |                                                                                                                                                                                                                                                                                                                                                                                                                                                                                                                                                                                                                                                                                                                                                                                                                                                                                                                                                                                                                                                                                                                                                                                                                                                                                                                                                                                                                                                                                                                                                                                                                                                                                                                                                                                                                                                                                                                                                                                                                                                                                                                                                                                                                                                                                                                                                                                                                                                                                                                                                                                                                                                                                                                                                                                                                                                                                                                          |  |      |    |          |                |       |         |       |          |         |       |         |       |          |         |       |         |        |          |         |       |         |        |          |         |       |         |        |          |         |      |        |       |          |         |         |        |       |          |         |         |        |       |          |         |         |         |        |          |         |         |         |        |          |         |         |          |         |          |          |  |      |     |     |     |       |       |        |        |         |       |        |       |         |        |         |        |        |       |         |         |         |       |         |       |         |         |         |        |         |       |         |        |        |        |         |      |       |       |        |       |         |         |        |        |        |       |         |         |        |       |        |       |         |         |          |         |         |        |         |         |          |         |         |        |          |         |          |         |        |         |          |      |    |     |          |          |          |
| d.1.6                                                                                                                                                                                                                                                                                                                                                                                                                                                                                                                                                                                                                                                                                                                                                                                                                                                                                                                                                                                                                                                                                                                                                                                                                                                                                                                                                                                                                                                                                                                                                                                                                                                                                                                                                                                                                                                                                                                                                                                                                                                                                                                                                                                                                                                                                                                                                                                                                                                                                                                                                                                                                                                                                                                                                                                                                                                                                                                                | -18.794   | -4.736   | 0.2603   | 18.829         | 84.7473        |       |         |       |          |          |       |         |       |          |          |       |         |       |          |          |       |         |        |          |          |       |         |       |          |          |      |        |       |          |          |         |        |       |          |          |         |        |       |          |          |         |         |         |          |          |         |        |        |          |          |         |         |        |          |          |  |      |     |     |     |       |       |         |        |          |       |       |       |         |        |          |        |        |       |          |        |          |       |        |       |          |         |          |       |        |       |          |        |          |       |       |      |        |       |         |       |       |         |         |        |         |       |        |         |        |       |         |       |        |         |           |         |          |        |         |         |           |         |         |        |         |         |           |         |          |        |         |      |    |     |          |          |          |                                                                                                                                                                                                                                                                                                                                                                                                                                                                                                                                                                                                                                                                                                                                                                                                                                                                                                                                                                                                                                                                                                                                                                                                                                                                                                                                                                                                                                                                                                                                                                                                                                                                                                                                                                                                                                                                                                                                                                                                                                                                                                                                                                                                                                                                                                                                                                                                                                                                                                                                                                                                                                                                                                                                                                                                                                                                                                                          |  |      |    |          |                |       |         |       |          |         |       |         |       |          |         |       |         |        |          |         |       |         |        |          |         |       |         |        |          |         |      |        |       |          |         |         |        |       |          |         |         |        |       |          |         |         |         |        |          |         |         |         |        |          |         |         |          |         |          |          |  |      |     |     |     |       |       |        |        |         |       |        |       |         |        |         |        |        |       |         |         |         |       |         |       |         |         |         |        |         |       |         |        |        |        |         |      |       |       |        |       |         |         |        |        |        |       |         |         |        |       |        |       |         |         |          |         |         |        |         |         |          |         |         |        |          |         |          |         |        |         |          |      |    |     |          |          |          |
| sd.d                                                                                                                                                                                                                                                                                                                                                                                                                                                                                                                                                                                                                                                                                                                                                                                                                                                                                                                                                                                                                                                                                                                                                                                                                                                                                                                                                                                                                                                                                                                                                                                                                                                                                                                                                                                                                                                                                                                                                                                                                                                                                                                                                                                                                                                                                                                                                                                                                                                                                                                                                                                                                                                                                                                                                                                                                                                                                                                                 | 2.605     | 4.108    | 5.2322   | 6.777          | 11.7273        |       |         |       |          |          |       |         |       |          |          |       |         |       |          |          |       |         |        |          |          |       |         |       |          |          |      |        |       |          |          |         |        |       |          |          |         |        |       |          |          |         |         |         |          |          |         |        |        |          |          |         |         |        |          |          |  |      |     |     |     |       |       |         |        |          |       |       |       |         |        |          |        |        |       |          |        |          |       |        |       |          |         |          |       |        |       |          |        |          |       |       |      |        |       |         |       |       |         |         |        |         |       |        |         |        |       |         |       |        |         |           |         |          |        |         |         |           |         |         |        |         |         |           |         |          |        |         |      |    |     |          |          |          |                                                                                                                                                                                                                                                                                                                                                                                                                                                                                                                                                                                                                                                                                                                                                                                                                                                                                                                                                                                                                                                                                                                                                                                                                                                                                                                                                                                                                                                                                                                                                                                                                                                                                                                                                                                                                                                                                                                                                                                                                                                                                                                                                                                                                                                                                                                                                                                                                                                                                                                                                                                                                                                                                                                                                                                                                                                                                                                          |  |      |    |          |                |       |         |       |          |         |       |         |       |          |         |       |         |        |          |         |       |         |        |          |         |       |         |        |          |         |      |        |       |          |         |         |        |       |          |         |         |        |       |          |         |         |         |        |          |         |         |         |        |          |         |         |          |         |          |          |  |      |     |     |     |       |       |        |        |         |       |        |       |         |        |         |        |        |       |         |         |         |       |         |       |         |         |         |        |         |       |         |        |        |        |         |      |       |       |        |       |         |         |        |        |        |       |         |         |        |       |        |       |         |         |          |         |         |        |         |         |          |         |         |        |          |         |          |         |        |         |          |      |    |     |          |          |          |
| beta[2]                                                                                                                                                                                                                                                                                                                                                                                                                                                                                                                                                                                                                                                                                                                                                                                                                                                                                                                                                                                                                                                                                                                                                                                                                                                                                                                                                                                                                                                                                                                                                                                                                                                                                                                                                                                                                                                                                                                                                                                                                                                                                                                                                                                                                                                                                                                                                                                                                                                                                                                                                                                                                                                                                                                                                                                                                                                                                                                              | -7.036    | -1.916   | 0.6971   | 3.153          | 21.6595        |       |         |       |          |          |       |         |       |          |          |       |         |       |          |          |       |         |        |          |          |       |         |       |          |          |      |        |       |          |          |         |        |       |          |          |         |        |       |          |          |         |         |         |          |          |         |        |        |          |          |         |         |        |          |          |  |      |     |     |     |       |       |         |        |          |       |       |       |         |        |          |        |        |       |          |        |          |       |        |       |          |         |          |       |        |       |          |        |          |       |       |      |        |       |         |       |       |         |         |        |         |       |        |         |        |       |         |       |        |         |           |         |          |        |         |         |           |         |         |        |         |         |           |         |          |        |         |      |    |     |          |          |          |                                                                                                                                                                                                                                                                                                                                                                                                                                                                                                                                                                                                                                                                                                                                                                                                                                                                                                                                                                                                                                                                                                                                                                                                                                                                                                                                                                                                                                                                                                                                                                                                                                                                                                                                                                                                                                                                                                                                                                                                                                                                                                                                                                                                                                                                                                                                                                                                                                                                                                                                                                                                                                                                                                                                                                                                                                                                                                                          |  |      |    |          |                |       |         |       |          |         |       |         |       |          |         |       |         |        |          |         |       |         |        |          |         |       |         |        |          |         |      |        |       |          |         |         |        |       |          |         |         |        |       |          |         |         |         |        |          |         |         |         |        |          |         |         |          |         |          |          |  |      |     |     |     |       |       |        |        |         |       |        |       |         |        |         |        |        |       |         |         |         |       |         |       |         |         |         |        |         |       |         |        |        |        |         |      |       |       |        |       |         |         |        |        |        |       |         |         |        |       |        |       |         |         |          |         |         |        |         |         |          |         |         |        |          |         |          |         |        |         |          |      |    |     |          |          |          |
| beta[3]                                                                                                                                                                                                                                                                                                                                                                                                                                                                                                                                                                                                                                                                                                                                                                                                                                                                                                                                                                                                                                                                                                                                                                                                                                                                                                                                                                                                                                                                                                                                                                                                                                                                                                                                                                                                                                                                                                                                                                                                                                                                                                                                                                                                                                                                                                                                                                                                                                                                                                                                                                                                                                                                                                                                                                                                                                                                                                                              | -6.975    | 1.136    | 4.9575   | 8.309          | 14.5036        |       |         |       |          |          |       |         |       |          |          |       |         |       |          |          |       |         |        |          |          |       |         |       |          |          |      |        |       |          |          |         |        |       |          |          |         |        |       |          |          |         |         |         |          |          |         |        |        |          |          |         |         |        |          |          |  |      |     |     |     |       |       |         |        |          |       |       |       |         |        |          |        |        |       |          |        |          |       |        |       |          |         |          |       |        |       |          |        |          |       |       |      |        |       |         |       |       |         |         |        |         |       |        |         |        |       |         |       |        |         |           |         |          |        |         |         |           |         |         |        |         |         |           |         |          |        |         |      |    |     |          |          |          |                                                                                                                                                                                                                                                                                                                                                                                                                                                                                                                                                                                                                                                                                                                                                                                                                                                                                                                                                                                                                                                                                                                                                                                                                                                                                                                                                                                                                                                                                                                                                                                                                                                                                                                                                                                                                                                                                                                                                                                                                                                                                                                                                                                                                                                                                                                                                                                                                                                                                                                                                                                                                                                                                                                                                                                                                                                                                                                          |  |      |    |          |                |       |         |       |          |         |       |         |       |          |         |       |         |        |          |         |       |         |        |          |         |       |         |        |          |         |      |        |       |          |         |         |        |       |          |         |         |        |       |          |         |         |         |        |          |         |         |         |        |          |         |         |          |         |          |          |  |      |     |     |     |       |       |        |        |         |       |        |       |         |        |         |        |        |       |         |         |         |       |         |       |         |         |         |        |         |       |         |        |        |        |         |      |       |       |        |       |         |         |        |        |        |       |         |         |        |       |        |       |         |         |          |         |         |        |         |         |          |         |         |        |          |         |          |         |        |         |          |      |    |     |          |          |          |
| beta[4]                                                                                                                                                                                                                                                                                                                                                                                                                                                                                                                                                                                                                                                                                                                                                                                                                                                                                                                                                                                                                                                                                                                                                                                                                                                                                                                                                                                                                                                                                                                                                                                                                                                                                                                                                                                                                                                                                                                                                                                                                                                                                                                                                                                                                                                                                                                                                                                                                                                                                                                                                                                                                                                                                                                                                                                                                                                                                                                              | -119.848  | -17.867  | -1.1542  | 15.033         | 92.7916        |       |         |       |          |          |       |         |       |          |          |       |         |       |          |          |       |         |        |          |          |       |         |       |          |          |      |        |       |          |          |         |        |       |          |          |         |        |       |          |          |         |         |         |          |          |         |        |        |          |          |         |         |        |          |          |  |      |     |     |     |       |       |         |        |          |       |       |       |         |        |          |        |        |       |          |        |          |       |        |       |          |         |          |       |        |       |          |        |          |       |       |      |        |       |         |       |       |         |         |        |         |       |        |         |        |       |         |       |        |         |           |         |          |        |         |         |           |         |         |        |         |         |           |         |          |        |         |      |    |     |          |          |          |                                                                                                                                                                                                                                                                                                                                                                                                                                                                                                                                                                                                                                                                                                                                                                                                                                                                                                                                                                                                                                                                                                                                                                                                                                                                                                                                                                                                                                                                                                                                                                                                                                                                                                                                                                                                                                                                                                                                                                                                                                                                                                                                                                                                                                                                                                                                                                                                                                                                                                                                                                                                                                                                                                                                                                                                                                                                                                                          |  |      |    |          |                |       |         |       |          |         |       |         |       |          |         |       |         |        |          |         |       |         |        |          |         |       |         |        |          |         |      |        |       |          |         |         |        |       |          |         |         |        |       |          |         |         |         |        |          |         |         |         |        |          |         |         |          |         |          |          |  |      |     |     |     |       |       |        |        |         |       |        |       |         |        |         |        |        |       |         |         |         |       |         |       |         |         |         |        |         |       |         |        |        |        |         |      |       |       |        |       |         |         |        |        |        |       |         |         |        |       |        |       |         |         |          |         |         |        |         |         |          |         |         |        |          |         |          |         |        |         |          |      |    |     |          |          |          |
| beta[5]                                                                                                                                                                                                                                                                                                                                                                                                                                                                                                                                                                                                                                                                                                                                                                                                                                                                                                                                                                                                                                                                                                                                                                                                                                                                                                                                                                                                                                                                                                                                                                                                                                                                                                                                                                                                                                                                                                                                                                                                                                                                                                                                                                                                                                                                                                                                                                                                                                                                                                                                                                                                                                                                                                                                                                                                                                                                                                                              | -137.792  | -18.745  | -0.3204  | 17.537         | 144.8557       |       |         |       |          |          |       |         |       |          |          |       |         |       |          |          |       |         |        |          |          |       |         |       |          |          |      |        |       |          |          |         |        |       |          |          |         |        |       |          |          |         |         |         |          |          |         |        |        |          |          |         |         |        |          |          |  |      |     |     |     |       |       |         |        |          |       |       |       |         |        |          |        |        |       |          |        |          |       |        |       |          |         |          |       |        |       |          |        |          |       |       |      |        |       |         |       |       |         |         |        |         |       |        |         |        |       |         |       |        |         |           |         |          |        |         |         |           |         |         |        |         |         |           |         |          |        |         |      |    |     |          |          |          |                                                                                                                                                                                                                                                                                                                                                                                                                                                                                                                                                                                                                                                                                                                                                                                                                                                                                                                                                                                                                                                                                                                                                                                                                                                                                                                                                                                                                                                                                                                                                                                                                                                                                                                                                                                                                                                                                                                                                                                                                                                                                                                                                                                                                                                                                                                                                                                                                                                                                                                                                                                                                                                                                                                                                                                                                                                                                                                          |  |      |    |          |                |       |         |       |          |         |       |         |       |          |         |       |         |        |          |         |       |         |        |          |         |       |         |        |          |         |      |        |       |          |         |         |        |       |          |         |         |        |       |          |         |         |         |        |          |         |         |         |        |          |         |         |          |         |          |          |  |      |     |     |     |       |       |        |        |         |       |        |       |         |        |         |        |        |       |         |         |         |       |         |       |         |         |         |        |         |       |         |        |        |        |         |      |       |       |        |       |         |         |        |        |        |       |         |         |        |       |        |       |         |         |          |         |         |        |         |         |          |         |         |        |          |         |          |         |        |         |          |      |    |     |          |          |          |
| beta[6]                                                                                                                                                                                                                                                                                                                                                                                                                                                                                                                                                                                                                                                                                                                                                                                                                                                                                                                                                                                                                                                                                                                                                                                                                                                                                                                                                                                                                                                                                                                                                                                                                                                                                                                                                                                                                                                                                                                                                                                                                                                                                                                                                                                                                                                                                                                                                                                                                                                                                                                                                                                                                                                                                                                                                                                                                                                                                                                              | -117.531  | -11.539  | 8.3265   | 166.304        | 799.2862       |       |         |       |          |          |       |         |       |          |          |       |         |       |          |          |       |         |        |          |          |       |         |       |          |          |      |        |       |          |          |         |        |       |          |          |         |        |       |          |          |         |         |         |          |          |         |        |        |          |          |         |         |        |          |          |  |      |     |     |     |       |       |         |        |          |       |       |       |         |        |          |        |        |       |          |        |          |       |        |       |          |         |          |       |        |       |          |        |          |       |       |      |        |       |         |       |       |         |         |        |         |       |        |         |        |       |         |       |        |         |           |         |          |        |         |         |           |         |         |        |         |         |           |         |          |        |         |      |    |     |          |          |          |                                                                                                                                                                                                                                                                                                                                                                                                                                                                                                                                                                                                                                                                                                                                                                                                                                                                                                                                                                                                                                                                                                                                                                                                                                                                                                                                                                                                                                                                                                                                                                                                                                                                                                                                                                                                                                                                                                                                                                                                                                                                                                                                                                                                                                                                                                                                                                                                                                                                                                                                                                                                                                                                                                                                                                                                                                                                                                                          |  |      |    |          |                |       |         |       |          |         |       |         |       |          |         |       |         |        |          |         |       |         |        |          |         |       |         |        |          |         |      |        |       |          |         |         |        |       |          |         |         |        |       |          |         |         |         |        |          |         |         |         |        |          |         |         |          |         |          |          |  |      |     |     |     |       |       |        |        |         |       |        |       |         |        |         |        |        |       |         |         |         |       |         |       |         |         |         |        |         |       |         |        |        |        |         |      |       |       |        |       |         |         |        |        |        |       |         |         |        |       |        |       |         |         |          |         |         |        |         |         |          |         |         |        |          |         |          |         |        |         |          |      |    |     |          |          |          |
| Dbar                                                                                                                                                                                                                                                                                                                                                                                                                                                                                                                                                                                                                                                                                                                                                                                                                                                                                                                                                                                                                                                                                                                                                                                                                                                                                                                                                                                                                                                                                                                                                                                                                                                                                                                                                                                                                                                                                                                                                                                                                                                                                                                                                                                                                                                                                                                                                                                                                                                                                                                                                                                                                                                                                                                                                                                                                                                                                                                                 | pD        | DIC      |          |                |                |       |         |       |          |          |       |         |       |          |          |       |         |       |          |          |       |         |        |          |          |       |         |       |          |          |      |        |       |          |          |         |        |       |          |          |         |        |       |          |          |         |         |         |          |          |         |        |        |          |          |         |         |        |          |          |  |      |     |     |     |       |       |         |        |          |       |       |       |         |        |          |        |        |       |          |        |          |       |        |       |          |         |          |       |        |       |          |        |          |       |       |      |        |       |         |       |       |         |         |        |         |       |        |         |        |       |         |       |        |         |           |         |          |        |         |         |           |         |         |        |         |         |           |         |          |        |         |      |    |     |          |          |          |                                                                                                                                                                                                                                                                                                                                                                                                                                                                                                                                                                                                                                                                                                                                                                                                                                                                                                                                                                                                                                                                                                                                                                                                                                                                                                                                                                                                                                                                                                                                                                                                                                                                                                                                                                                                                                                                                                                                                                                                                                                                                                                                                                                                                                                                                                                                                                                                                                                                                                                                                                                                                                                                                                                                                                                                                                                                                                                          |  |      |    |          |                |       |         |       |          |         |       |         |       |          |         |       |         |        |          |         |       |         |        |          |         |       |         |        |          |         |      |        |       |          |         |         |        |       |          |         |         |        |       |          |         |         |         |        |          |         |         |         |        |          |         |         |          |         |          |          |  |      |     |     |     |       |       |        |        |         |       |        |       |         |        |         |        |        |       |         |         |         |       |         |       |         |         |         |        |         |       |         |        |        |        |         |      |       |       |        |       |         |         |        |        |        |       |         |         |        |       |        |       |         |         |          |         |         |        |         |         |          |         |         |        |          |         |          |         |        |         |          |      |    |     |          |          |          |
| 29.02003                                                                                                                                                                                                                                                                                                                                                                                                                                                                                                                                                                                                                                                                                                                                                                                                                                                                                                                                                                                                                                                                                                                                                                                                                                                                                                                                                                                                                                                                                                                                                                                                                                                                                                                                                                                                                                                                                                                                                                                                                                                                                                                                                                                                                                                                                                                                                                                                                                                                                                                                                                                                                                                                                                                                                                                                                                                                                                                             | 27.65391  | 56.67395 |          |                |                |       |         |       |          |          |       |         |       |          |          |       |         |       |          |          |       |         |        |          |          |       |         |       |          |          |      |        |       |          |          |         |        |       |          |          |         |        |       |          |          |         |         |         |          |          |         |        |        |          |          |         |         |        |          |          |  |      |     |     |     |       |       |         |        |          |       |       |       |         |        |          |        |        |       |          |        |          |       |        |       |          |         |          |       |        |       |          |        |          |       |       |      |        |       |         |       |       |         |         |        |         |       |        |         |        |       |         |       |        |         |           |         |          |        |         |         |           |         |         |        |         |         |           |         |          |        |         |      |    |     |          |          |          |                                                                                                                                                                                                                                                                                                                                                                                                                                                                                                                                                                                                                                                                                                                                                                                                                                                                                                                                                                                                                                                                                                                                                                                                                                                                                                                                                                                                                                                                                                                                                                                                                                                                                                                                                                                                                                                                                                                                                                                                                                                                                                                                                                                                                                                                                                                                                                                                                                                                                                                                                                                                                                                                                                                                                                                                                                                                                                                          |  |      |    |          |                |       |         |       |          |         |       |         |       |          |         |       |         |        |          |         |       |         |        |          |         |       |         |        |          |         |      |        |       |          |         |         |        |       |          |         |         |        |       |          |         |         |         |        |          |         |         |         |        |          |         |         |          |         |          |          |  |      |     |     |     |       |       |        |        |         |       |        |       |         |        |         |        |        |       |         |         |         |       |         |       |         |         |         |        |         |       |         |        |        |        |         |      |       |       |        |       |         |         |        |        |        |       |         |         |        |       |        |       |         |         |          |         |         |        |         |         |          |         |         |        |          |         |          |         |        |         |          |      |    |     |          |          |          |

### Frequency

| <p>1. Empirical mean and standard deviation for each variable, plus standard error of the mean:</p> <table border="0"> <thead> <tr> <th></th> <th>Mean</th> <th>SD</th> <th>Naive SE</th> <th>Time-series SE</th> </tr> </thead> <tbody> <tr><td>d.1.2</td><td>-0.3208</td><td>4.304</td><td>0.009624</td><td>0.07900</td></tr> <tr><td>d.1.3</td><td>-5.5271</td><td>2.927</td><td>0.006545</td><td>0.02329</td></tr> <tr><td>d.1.4</td><td>-3.5194</td><td>18.108</td><td>0.040491</td><td>1.18002</td></tr> <tr><td>d.1.5</td><td>-8.3134</td><td>49.515</td><td>0.110718</td><td>6.31522</td></tr> <tr><td>d.1.6</td><td>-2.0667</td><td>6.109</td><td>0.013661</td><td>0.09206</td></tr> <tr><td>sd.d</td><td>6.8054</td><td>2.450</td><td>0.005478</td><td>0.04633</td></tr> <tr><td>beta[2]</td><td>-0.5968</td><td>9.684</td><td>0.021653</td><td>1.56276</td></tr> <tr><td>beta[3]</td><td>1.3807</td><td>4.654</td><td>0.010407</td><td>0.63109</td></tr> <tr><td>beta[4]</td><td>-6.7224</td><td>56.938</td><td>0.127317</td><td>3.82885</td></tr> <tr><td>beta[5]</td><td>-16.8375</td><td>166.351</td><td>0.371971</td><td>20.63453</td></tr> <tr><td>beta[6]</td><td>2.2116</td><td>13.752</td><td>0.030751</td><td>1.23620</td></tr> </tbody> </table> <p>2. Quantiles for each variable:</p> <table border="0"> <thead> <tr> <th></th> <th>2.5%</th> <th>25%</th> <th>50%</th> <th>75%</th> <th>97.5%</th> </tr> </thead> <tbody> <tr><td>d.1.2</td><td>-8.904</td><td>-2.912</td><td>-0.34354</td><td>2.229</td><td>8.4657</td></tr> <tr><td>d.1.3</td><td>-11.596</td><td>-7.235</td><td>-5.45416</td><td>-3.754</td><td>0.2086</td></tr> <tr><td>d.1.4</td><td>-52.336</td><td>-9.857</td><td>-1.89190</td><td>5.728</td><td>26.5852</td></tr> <tr><td>d.1.5</td><td>-85.090</td><td>-13.702</td><td>-3.42559</td><td>6.815</td><td>48.9464</td></tr> <tr><td>d.1.6</td><td>-14.154</td><td>-5.767</td><td>-2.10760</td><td>1.511</td><td>10.5028</td></tr> <tr><td>sd.d</td><td>3.445</td><td>5.076</td><td>6.31948</td><td>7.997</td><td>13.0743</td></tr> <tr><td>beta[2]</td><td>-18.602</td><td>-6.589</td><td>-1.11532</td><td>4.731</td><td>22.1422</td></tr> <tr><td>beta[3]</td><td>-8.457</td><td>-1.380</td><td>1.09995</td><td>4.227</td><td>10.9737</td></tr> <tr><td>beta[4]</td><td>-170.847</td><td>-18.882</td><td>-0.57326</td><td>16.532</td><td>85.2987</td></tr> <tr><td>beta[5]</td><td>-275.011</td><td>-18.383</td><td>0.08046</td><td>18.614</td><td>173.8948</td></tr> <tr><td>beta[6]</td><td>-23.956</td><td>-6.256</td><td>1.57100</td><td>10.131</td><td>30.8826</td></tr> </tbody> </table> <p>-- Model fit (residual deviance):</p> <table border="0"> <thead> <tr> <th>Dbar</th> <th>pD</th> <th>DIC</th> </tr> </thead> <tbody> <tr> <td>28.20935</td> <td>27.55312</td> <td>55.76247</td> </tr> </tbody> </table> <p>28 data points, ratio 1.007, I<sup>2</sup> = 4%</p> |          | Mean     | SD       | Naive SE       | Time-series SE | d.1.2 | -0.3208 | 4.304 | 0.009624 | 0.07900 | d.1.3 | -5.5271 | 2.927 | 0.006545 | 0.02329 | d.1.4 | -3.5194 | 18.108 | 0.040491 | 1.18002 | d.1.5 | -8.3134 | 49.515 | 0.110718 | 6.31522 | d.1.6 | -2.0667 | 6.109 | 0.013661 | 0.09206 | sd.d | 6.8054 | 2.450 | 0.005478 | 0.04633 | beta[2] | -0.5968 | 9.684 | 0.021653 | 1.56276 | beta[3] | 1.3807 | 4.654 | 0.010407 | 0.63109 | beta[4] | -6.7224 | 56.938 | 0.127317 | 3.82885 | beta[5] | -16.8375 | 166.351 | 0.371971 | 20.63453 | beta[6] | 2.2116 | 13.752 | 0.030751 | 1.23620 |  | 2.5% | 25% | 50% | 75% | 97.5% | d.1.2 | -8.904 | -2.912 | -0.34354 | 2.229 | 8.4657 | d.1.3 | -11.596 | -7.235 | -5.45416 | -3.754 | 0.2086 | d.1.4 | -52.336 | -9.857 | -1.89190 | 5.728 | 26.5852 | d.1.5 | -85.090 | -13.702 | -3.42559 | 6.815 | 48.9464 | d.1.6 | -14.154 | -5.767 | -2.10760 | 1.511 | 10.5028 | sd.d | 3.445 | 5.076 | 6.31948 | 7.997 | 13.0743 | beta[2] | -18.602 | -6.589 | -1.11532 | 4.731 | 22.1422 | beta[3] | -8.457 | -1.380 | 1.09995 | 4.227 | 10.9737 | beta[4] | -170.847 | -18.882 | -0.57326 | 16.532 | 85.2987 | beta[5] | -275.011 | -18.383 | 0.08046 | 18.614 | 173.8948 | beta[6] | -23.956 | -6.256 | 1.57100 | 10.131 | 30.8826 | Dbar | pD | DIC | 28.20935 | 27.55312 | 55.76247 |
|--------------------------------------------------------------------------------------------------------------------------------------------------------------------------------------------------------------------------------------------------------------------------------------------------------------------------------------------------------------------------------------------------------------------------------------------------------------------------------------------------------------------------------------------------------------------------------------------------------------------------------------------------------------------------------------------------------------------------------------------------------------------------------------------------------------------------------------------------------------------------------------------------------------------------------------------------------------------------------------------------------------------------------------------------------------------------------------------------------------------------------------------------------------------------------------------------------------------------------------------------------------------------------------------------------------------------------------------------------------------------------------------------------------------------------------------------------------------------------------------------------------------------------------------------------------------------------------------------------------------------------------------------------------------------------------------------------------------------------------------------------------------------------------------------------------------------------------------------------------------------------------------------------------------------------------------------------------------------------------------------------------------------------------------------------------------------------------------------------------------------------------------------------------------------------------------------------------------------------------------------------------------------------------------------------------------------------------------------------------------------------------------------------------------------------------------------------------------------------------------------------------------------------------------------------------------------------------------------------------------------------------------------------------------------------------------------------------------------------------------------------------------------------------------------------------------------------------------------------------------------------------------------------------------------------|----------|----------|----------|----------------|----------------|-------|---------|-------|----------|---------|-------|---------|-------|----------|---------|-------|---------|--------|----------|---------|-------|---------|--------|----------|---------|-------|---------|-------|----------|---------|------|--------|-------|----------|---------|---------|---------|-------|----------|---------|---------|--------|-------|----------|---------|---------|---------|--------|----------|---------|---------|----------|---------|----------|----------|---------|--------|--------|----------|---------|--|------|-----|-----|-----|-------|-------|--------|--------|----------|-------|--------|-------|---------|--------|----------|--------|--------|-------|---------|--------|----------|-------|---------|-------|---------|---------|----------|-------|---------|-------|---------|--------|----------|-------|---------|------|-------|-------|---------|-------|---------|---------|---------|--------|----------|-------|---------|---------|--------|--------|---------|-------|---------|---------|----------|---------|----------|--------|---------|---------|----------|---------|---------|--------|----------|---------|---------|--------|---------|--------|---------|------|----|-----|----------|----------|----------|
|                                                                                                                                                                                                                                                                                                                                                                                                                                                                                                                                                                                                                                                                                                                                                                                                                                                                                                                                                                                                                                                                                                                                                                                                                                                                                                                                                                                                                                                                                                                                                                                                                                                                                                                                                                                                                                                                                                                                                                                                                                                                                                                                                                                                                                                                                                                                                                                                                                                                                                                                                                                                                                                                                                                                                                                                                                                                                                                                | Mean     | SD       | Naive SE | Time-series SE |                |       |         |       |          |         |       |         |       |          |         |       |         |        |          |         |       |         |        |          |         |       |         |       |          |         |      |        |       |          |         |         |         |       |          |         |         |        |       |          |         |         |         |        |          |         |         |          |         |          |          |         |        |        |          |         |  |      |     |     |     |       |       |        |        |          |       |        |       |         |        |          |        |        |       |         |        |          |       |         |       |         |         |          |       |         |       |         |        |          |       |         |      |       |       |         |       |         |         |         |        |          |       |         |         |        |        |         |       |         |         |          |         |          |        |         |         |          |         |         |        |          |         |         |        |         |        |         |      |    |     |          |          |          |
| d.1.2                                                                                                                                                                                                                                                                                                                                                                                                                                                                                                                                                                                                                                                                                                                                                                                                                                                                                                                                                                                                                                                                                                                                                                                                                                                                                                                                                                                                                                                                                                                                                                                                                                                                                                                                                                                                                                                                                                                                                                                                                                                                                                                                                                                                                                                                                                                                                                                                                                                                                                                                                                                                                                                                                                                                                                                                                                                                                                                          | -0.3208  | 4.304    | 0.009624 | 0.07900        |                |       |         |       |          |         |       |         |       |          |         |       |         |        |          |         |       |         |        |          |         |       |         |       |          |         |      |        |       |          |         |         |         |       |          |         |         |        |       |          |         |         |         |        |          |         |         |          |         |          |          |         |        |        |          |         |  |      |     |     |     |       |       |        |        |          |       |        |       |         |        |          |        |        |       |         |        |          |       |         |       |         |         |          |       |         |       |         |        |          |       |         |      |       |       |         |       |         |         |         |        |          |       |         |         |        |        |         |       |         |         |          |         |          |        |         |         |          |         |         |        |          |         |         |        |         |        |         |      |    |     |          |          |          |
| d.1.3                                                                                                                                                                                                                                                                                                                                                                                                                                                                                                                                                                                                                                                                                                                                                                                                                                                                                                                                                                                                                                                                                                                                                                                                                                                                                                                                                                                                                                                                                                                                                                                                                                                                                                                                                                                                                                                                                                                                                                                                                                                                                                                                                                                                                                                                                                                                                                                                                                                                                                                                                                                                                                                                                                                                                                                                                                                                                                                          | -5.5271  | 2.927    | 0.006545 | 0.02329        |                |       |         |       |          |         |       |         |       |          |         |       |         |        |          |         |       |         |        |          |         |       |         |       |          |         |      |        |       |          |         |         |         |       |          |         |         |        |       |          |         |         |         |        |          |         |         |          |         |          |          |         |        |        |          |         |  |      |     |     |     |       |       |        |        |          |       |        |       |         |        |          |        |        |       |         |        |          |       |         |       |         |         |          |       |         |       |         |        |          |       |         |      |       |       |         |       |         |         |         |        |          |       |         |         |        |        |         |       |         |         |          |         |          |        |         |         |          |         |         |        |          |         |         |        |         |        |         |      |    |     |          |          |          |
| d.1.4                                                                                                                                                                                                                                                                                                                                                                                                                                                                                                                                                                                                                                                                                                                                                                                                                                                                                                                                                                                                                                                                                                                                                                                                                                                                                                                                                                                                                                                                                                                                                                                                                                                                                                                                                                                                                                                                                                                                                                                                                                                                                                                                                                                                                                                                                                                                                                                                                                                                                                                                                                                                                                                                                                                                                                                                                                                                                                                          | -3.5194  | 18.108   | 0.040491 | 1.18002        |                |       |         |       |          |         |       |         |       |          |         |       |         |        |          |         |       |         |        |          |         |       |         |       |          |         |      |        |       |          |         |         |         |       |          |         |         |        |       |          |         |         |         |        |          |         |         |          |         |          |          |         |        |        |          |         |  |      |     |     |     |       |       |        |        |          |       |        |       |         |        |          |        |        |       |         |        |          |       |         |       |         |         |          |       |         |       |         |        |          |       |         |      |       |       |         |       |         |         |         |        |          |       |         |         |        |        |         |       |         |         |          |         |          |        |         |         |          |         |         |        |          |         |         |        |         |        |         |      |    |     |          |          |          |
| d.1.5                                                                                                                                                                                                                                                                                                                                                                                                                                                                                                                                                                                                                                                                                                                                                                                                                                                                                                                                                                                                                                                                                                                                                                                                                                                                                                                                                                                                                                                                                                                                                                                                                                                                                                                                                                                                                                                                                                                                                                                                                                                                                                                                                                                                                                                                                                                                                                                                                                                                                                                                                                                                                                                                                                                                                                                                                                                                                                                          | -8.3134  | 49.515   | 0.110718 | 6.31522        |                |       |         |       |          |         |       |         |       |          |         |       |         |        |          |         |       |         |        |          |         |       |         |       |          |         |      |        |       |          |         |         |         |       |          |         |         |        |       |          |         |         |         |        |          |         |         |          |         |          |          |         |        |        |          |         |  |      |     |     |     |       |       |        |        |          |       |        |       |         |        |          |        |        |       |         |        |          |       |         |       |         |         |          |       |         |       |         |        |          |       |         |      |       |       |         |       |         |         |         |        |          |       |         |         |        |        |         |       |         |         |          |         |          |        |         |         |          |         |         |        |          |         |         |        |         |        |         |      |    |     |          |          |          |
| d.1.6                                                                                                                                                                                                                                                                                                                                                                                                                                                                                                                                                                                                                                                                                                                                                                                                                                                                                                                                                                                                                                                                                                                                                                                                                                                                                                                                                                                                                                                                                                                                                                                                                                                                                                                                                                                                                                                                                                                                                                                                                                                                                                                                                                                                                                                                                                                                                                                                                                                                                                                                                                                                                                                                                                                                                                                                                                                                                                                          | -2.0667  | 6.109    | 0.013661 | 0.09206        |                |       |         |       |          |         |       |         |       |          |         |       |         |        |          |         |       |         |        |          |         |       |         |       |          |         |      |        |       |          |         |         |         |       |          |         |         |        |       |          |         |         |         |        |          |         |         |          |         |          |          |         |        |        |          |         |  |      |     |     |     |       |       |        |        |          |       |        |       |         |        |          |        |        |       |         |        |          |       |         |       |         |         |          |       |         |       |         |        |          |       |         |      |       |       |         |       |         |         |         |        |          |       |         |         |        |        |         |       |         |         |          |         |          |        |         |         |          |         |         |        |          |         |         |        |         |        |         |      |    |     |          |          |          |
| sd.d                                                                                                                                                                                                                                                                                                                                                                                                                                                                                                                                                                                                                                                                                                                                                                                                                                                                                                                                                                                                                                                                                                                                                                                                                                                                                                                                                                                                                                                                                                                                                                                                                                                                                                                                                                                                                                                                                                                                                                                                                                                                                                                                                                                                                                                                                                                                                                                                                                                                                                                                                                                                                                                                                                                                                                                                                                                                                                                           | 6.8054   | 2.450    | 0.005478 | 0.04633        |                |       |         |       |          |         |       |         |       |          |         |       |         |        |          |         |       |         |        |          |         |       |         |       |          |         |      |        |       |          |         |         |         |       |          |         |         |        |       |          |         |         |         |        |          |         |         |          |         |          |          |         |        |        |          |         |  |      |     |     |     |       |       |        |        |          |       |        |       |         |        |          |        |        |       |         |        |          |       |         |       |         |         |          |       |         |       |         |        |          |       |         |      |       |       |         |       |         |         |         |        |          |       |         |         |        |        |         |       |         |         |          |         |          |        |         |         |          |         |         |        |          |         |         |        |         |        |         |      |    |     |          |          |          |
| beta[2]                                                                                                                                                                                                                                                                                                                                                                                                                                                                                                                                                                                                                                                                                                                                                                                                                                                                                                                                                                                                                                                                                                                                                                                                                                                                                                                                                                                                                                                                                                                                                                                                                                                                                                                                                                                                                                                                                                                                                                                                                                                                                                                                                                                                                                                                                                                                                                                                                                                                                                                                                                                                                                                                                                                                                                                                                                                                                                                        | -0.5968  | 9.684    | 0.021653 | 1.56276        |                |       |         |       |          |         |       |         |       |          |         |       |         |        |          |         |       |         |        |          |         |       |         |       |          |         |      |        |       |          |         |         |         |       |          |         |         |        |       |          |         |         |         |        |          |         |         |          |         |          |          |         |        |        |          |         |  |      |     |     |     |       |       |        |        |          |       |        |       |         |        |          |        |        |       |         |        |          |       |         |       |         |         |          |       |         |       |         |        |          |       |         |      |       |       |         |       |         |         |         |        |          |       |         |         |        |        |         |       |         |         |          |         |          |        |         |         |          |         |         |        |          |         |         |        |         |        |         |      |    |     |          |          |          |
| beta[3]                                                                                                                                                                                                                                                                                                                                                                                                                                                                                                                                                                                                                                                                                                                                                                                                                                                                                                                                                                                                                                                                                                                                                                                                                                                                                                                                                                                                                                                                                                                                                                                                                                                                                                                                                                                                                                                                                                                                                                                                                                                                                                                                                                                                                                                                                                                                                                                                                                                                                                                                                                                                                                                                                                                                                                                                                                                                                                                        | 1.3807   | 4.654    | 0.010407 | 0.63109        |                |       |         |       |          |         |       |         |       |          |         |       |         |        |          |         |       |         |        |          |         |       |         |       |          |         |      |        |       |          |         |         |         |       |          |         |         |        |       |          |         |         |         |        |          |         |         |          |         |          |          |         |        |        |          |         |  |      |     |     |     |       |       |        |        |          |       |        |       |         |        |          |        |        |       |         |        |          |       |         |       |         |         |          |       |         |       |         |        |          |       |         |      |       |       |         |       |         |         |         |        |          |       |         |         |        |        |         |       |         |         |          |         |          |        |         |         |          |         |         |        |          |         |         |        |         |        |         |      |    |     |          |          |          |
| beta[4]                                                                                                                                                                                                                                                                                                                                                                                                                                                                                                                                                                                                                                                                                                                                                                                                                                                                                                                                                                                                                                                                                                                                                                                                                                                                                                                                                                                                                                                                                                                                                                                                                                                                                                                                                                                                                                                                                                                                                                                                                                                                                                                                                                                                                                                                                                                                                                                                                                                                                                                                                                                                                                                                                                                                                                                                                                                                                                                        | -6.7224  | 56.938   | 0.127317 | 3.82885        |                |       |         |       |          |         |       |         |       |          |         |       |         |        |          |         |       |         |        |          |         |       |         |       |          |         |      |        |       |          |         |         |         |       |          |         |         |        |       |          |         |         |         |        |          |         |         |          |         |          |          |         |        |        |          |         |  |      |     |     |     |       |       |        |        |          |       |        |       |         |        |          |        |        |       |         |        |          |       |         |       |         |         |          |       |         |       |         |        |          |       |         |      |       |       |         |       |         |         |         |        |          |       |         |         |        |        |         |       |         |         |          |         |          |        |         |         |          |         |         |        |          |         |         |        |         |        |         |      |    |     |          |          |          |
| beta[5]                                                                                                                                                                                                                                                                                                                                                                                                                                                                                                                                                                                                                                                                                                                                                                                                                                                                                                                                                                                                                                                                                                                                                                                                                                                                                                                                                                                                                                                                                                                                                                                                                                                                                                                                                                                                                                                                                                                                                                                                                                                                                                                                                                                                                                                                                                                                                                                                                                                                                                                                                                                                                                                                                                                                                                                                                                                                                                                        | -16.8375 | 166.351  | 0.371971 | 20.63453       |                |       |         |       |          |         |       |         |       |          |         |       |         |        |          |         |       |         |        |          |         |       |         |       |          |         |      |        |       |          |         |         |         |       |          |         |         |        |       |          |         |         |         |        |          |         |         |          |         |          |          |         |        |        |          |         |  |      |     |     |     |       |       |        |        |          |       |        |       |         |        |          |        |        |       |         |        |          |       |         |       |         |         |          |       |         |       |         |        |          |       |         |      |       |       |         |       |         |         |         |        |          |       |         |         |        |        |         |       |         |         |          |         |          |        |         |         |          |         |         |        |          |         |         |        |         |        |         |      |    |     |          |          |          |
| beta[6]                                                                                                                                                                                                                                                                                                                                                                                                                                                                                                                                                                                                                                                                                                                                                                                                                                                                                                                                                                                                                                                                                                                                                                                                                                                                                                                                                                                                                                                                                                                                                                                                                                                                                                                                                                                                                                                                                                                                                                                                                                                                                                                                                                                                                                                                                                                                                                                                                                                                                                                                                                                                                                                                                                                                                                                                                                                                                                                        | 2.2116   | 13.752   | 0.030751 | 1.23620        |                |       |         |       |          |         |       |         |       |          |         |       |         |        |          |         |       |         |        |          |         |       |         |       |          |         |      |        |       |          |         |         |         |       |          |         |         |        |       |          |         |         |         |        |          |         |         |          |         |          |          |         |        |        |          |         |  |      |     |     |     |       |       |        |        |          |       |        |       |         |        |          |        |        |       |         |        |          |       |         |       |         |         |          |       |         |       |         |        |          |       |         |      |       |       |         |       |         |         |         |        |          |       |         |         |        |        |         |       |         |         |          |         |          |        |         |         |          |         |         |        |          |         |         |        |         |        |         |      |    |     |          |          |          |
|                                                                                                                                                                                                                                                                                                                                                                                                                                                                                                                                                                                                                                                                                                                                                                                                                                                                                                                                                                                                                                                                                                                                                                                                                                                                                                                                                                                                                                                                                                                                                                                                                                                                                                                                                                                                                                                                                                                                                                                                                                                                                                                                                                                                                                                                                                                                                                                                                                                                                                                                                                                                                                                                                                                                                                                                                                                                                                                                | 2.5%     | 25%      | 50%      | 75%            | 97.5%          |       |         |       |          |         |       |         |       |          |         |       |         |        |          |         |       |         |        |          |         |       |         |       |          |         |      |        |       |          |         |         |         |       |          |         |         |        |       |          |         |         |         |        |          |         |         |          |         |          |          |         |        |        |          |         |  |      |     |     |     |       |       |        |        |          |       |        |       |         |        |          |        |        |       |         |        |          |       |         |       |         |         |          |       |         |       |         |        |          |       |         |      |       |       |         |       |         |         |         |        |          |       |         |         |        |        |         |       |         |         |          |         |          |        |         |         |          |         |         |        |          |         |         |        |         |        |         |      |    |     |          |          |          |
| d.1.2                                                                                                                                                                                                                                                                                                                                                                                                                                                                                                                                                                                                                                                                                                                                                                                                                                                                                                                                                                                                                                                                                                                                                                                                                                                                                                                                                                                                                                                                                                                                                                                                                                                                                                                                                                                                                                                                                                                                                                                                                                                                                                                                                                                                                                                                                                                                                                                                                                                                                                                                                                                                                                                                                                                                                                                                                                                                                                                          | -8.904   | -2.912   | -0.34354 | 2.229          | 8.4657         |       |         |       |          |         |       |         |       |          |         |       |         |        |          |         |       |         |        |          |         |       |         |       |          |         |      |        |       |          |         |         |         |       |          |         |         |        |       |          |         |         |         |        |          |         |         |          |         |          |          |         |        |        |          |         |  |      |     |     |     |       |       |        |        |          |       |        |       |         |        |          |        |        |       |         |        |          |       |         |       |         |         |          |       |         |       |         |        |          |       |         |      |       |       |         |       |         |         |         |        |          |       |         |         |        |        |         |       |         |         |          |         |          |        |         |         |          |         |         |        |          |         |         |        |         |        |         |      |    |     |          |          |          |
| d.1.3                                                                                                                                                                                                                                                                                                                                                                                                                                                                                                                                                                                                                                                                                                                                                                                                                                                                                                                                                                                                                                                                                                                                                                                                                                                                                                                                                                                                                                                                                                                                                                                                                                                                                                                                                                                                                                                                                                                                                                                                                                                                                                                                                                                                                                                                                                                                                                                                                                                                                                                                                                                                                                                                                                                                                                                                                                                                                                                          | -11.596  | -7.235   | -5.45416 | -3.754         | 0.2086         |       |         |       |          |         |       |         |       |          |         |       |         |        |          |         |       |         |        |          |         |       |         |       |          |         |      |        |       |          |         |         |         |       |          |         |         |        |       |          |         |         |         |        |          |         |         |          |         |          |          |         |        |        |          |         |  |      |     |     |     |       |       |        |        |          |       |        |       |         |        |          |        |        |       |         |        |          |       |         |       |         |         |          |       |         |       |         |        |          |       |         |      |       |       |         |       |         |         |         |        |          |       |         |         |        |        |         |       |         |         |          |         |          |        |         |         |          |         |         |        |          |         |         |        |         |        |         |      |    |     |          |          |          |
| d.1.4                                                                                                                                                                                                                                                                                                                                                                                                                                                                                                                                                                                                                                                                                                                                                                                                                                                                                                                                                                                                                                                                                                                                                                                                                                                                                                                                                                                                                                                                                                                                                                                                                                                                                                                                                                                                                                                                                                                                                                                                                                                                                                                                                                                                                                                                                                                                                                                                                                                                                                                                                                                                                                                                                                                                                                                                                                                                                                                          | -52.336  | -9.857   | -1.89190 | 5.728          | 26.5852        |       |         |       |          |         |       |         |       |          |         |       |         |        |          |         |       |         |        |          |         |       |         |       |          |         |      |        |       |          |         |         |         |       |          |         |         |        |       |          |         |         |         |        |          |         |         |          |         |          |          |         |        |        |          |         |  |      |     |     |     |       |       |        |        |          |       |        |       |         |        |          |        |        |       |         |        |          |       |         |       |         |         |          |       |         |       |         |        |          |       |         |      |       |       |         |       |         |         |         |        |          |       |         |         |        |        |         |       |         |         |          |         |          |        |         |         |          |         |         |        |          |         |         |        |         |        |         |      |    |     |          |          |          |
| d.1.5                                                                                                                                                                                                                                                                                                                                                                                                                                                                                                                                                                                                                                                                                                                                                                                                                                                                                                                                                                                                                                                                                                                                                                                                                                                                                                                                                                                                                                                                                                                                                                                                                                                                                                                                                                                                                                                                                                                                                                                                                                                                                                                                                                                                                                                                                                                                                                                                                                                                                                                                                                                                                                                                                                                                                                                                                                                                                                                          | -85.090  | -13.702  | -3.42559 | 6.815          | 48.9464        |       |         |       |          |         |       |         |       |          |         |       |         |        |          |         |       |         |        |          |         |       |         |       |          |         |      |        |       |          |         |         |         |       |          |         |         |        |       |          |         |         |         |        |          |         |         |          |         |          |          |         |        |        |          |         |  |      |     |     |     |       |       |        |        |          |       |        |       |         |        |          |        |        |       |         |        |          |       |         |       |         |         |          |       |         |       |         |        |          |       |         |      |       |       |         |       |         |         |         |        |          |       |         |         |        |        |         |       |         |         |          |         |          |        |         |         |          |         |         |        |          |         |         |        |         |        |         |      |    |     |          |          |          |
| d.1.6                                                                                                                                                                                                                                                                                                                                                                                                                                                                                                                                                                                                                                                                                                                                                                                                                                                                                                                                                                                                                                                                                                                                                                                                                                                                                                                                                                                                                                                                                                                                                                                                                                                                                                                                                                                                                                                                                                                                                                                                                                                                                                                                                                                                                                                                                                                                                                                                                                                                                                                                                                                                                                                                                                                                                                                                                                                                                                                          | -14.154  | -5.767   | -2.10760 | 1.511          | 10.5028        |       |         |       |          |         |       |         |       |          |         |       |         |        |          |         |       |         |        |          |         |       |         |       |          |         |      |        |       |          |         |         |         |       |          |         |         |        |       |          |         |         |         |        |          |         |         |          |         |          |          |         |        |        |          |         |  |      |     |     |     |       |       |        |        |          |       |        |       |         |        |          |        |        |       |         |        |          |       |         |       |         |         |          |       |         |       |         |        |          |       |         |      |       |       |         |       |         |         |         |        |          |       |         |         |        |        |         |       |         |         |          |         |          |        |         |         |          |         |         |        |          |         |         |        |         |        |         |      |    |     |          |          |          |
| sd.d                                                                                                                                                                                                                                                                                                                                                                                                                                                                                                                                                                                                                                                                                                                                                                                                                                                                                                                                                                                                                                                                                                                                                                                                                                                                                                                                                                                                                                                                                                                                                                                                                                                                                                                                                                                                                                                                                                                                                                                                                                                                                                                                                                                                                                                                                                                                                                                                                                                                                                                                                                                                                                                                                                                                                                                                                                                                                                                           | 3.445    | 5.076    | 6.31948  | 7.997          | 13.0743        |       |         |       |          |         |       |         |       |          |         |       |         |        |          |         |       |         |        |          |         |       |         |       |          |         |      |        |       |          |         |         |         |       |          |         |         |        |       |          |         |         |         |        |          |         |         |          |         |          |          |         |        |        |          |         |  |      |     |     |     |       |       |        |        |          |       |        |       |         |        |          |        |        |       |         |        |          |       |         |       |         |         |          |       |         |       |         |        |          |       |         |      |       |       |         |       |         |         |         |        |          |       |         |         |        |        |         |       |         |         |          |         |          |        |         |         |          |         |         |        |          |         |         |        |         |        |         |      |    |     |          |          |          |
| beta[2]                                                                                                                                                                                                                                                                                                                                                                                                                                                                                                                                                                                                                                                                                                                                                                                                                                                                                                                                                                                                                                                                                                                                                                                                                                                                                                                                                                                                                                                                                                                                                                                                                                                                                                                                                                                                                                                                                                                                                                                                                                                                                                                                                                                                                                                                                                                                                                                                                                                                                                                                                                                                                                                                                                                                                                                                                                                                                                                        | -18.602  | -6.589   | -1.11532 | 4.731          | 22.1422        |       |         |       |          |         |       |         |       |          |         |       |         |        |          |         |       |         |        |          |         |       |         |       |          |         |      |        |       |          |         |         |         |       |          |         |         |        |       |          |         |         |         |        |          |         |         |          |         |          |          |         |        |        |          |         |  |      |     |     |     |       |       |        |        |          |       |        |       |         |        |          |        |        |       |         |        |          |       |         |       |         |         |          |       |         |       |         |        |          |       |         |      |       |       |         |       |         |         |         |        |          |       |         |         |        |        |         |       |         |         |          |         |          |        |         |         |          |         |         |        |          |         |         |        |         |        |         |      |    |     |          |          |          |
| beta[3]                                                                                                                                                                                                                                                                                                                                                                                                                                                                                                                                                                                                                                                                                                                                                                                                                                                                                                                                                                                                                                                                                                                                                                                                                                                                                                                                                                                                                                                                                                                                                                                                                                                                                                                                                                                                                                                                                                                                                                                                                                                                                                                                                                                                                                                                                                                                                                                                                                                                                                                                                                                                                                                                                                                                                                                                                                                                                                                        | -8.457   | -1.380   | 1.09995  | 4.227          | 10.9737        |       |         |       |          |         |       |         |       |          |         |       |         |        |          |         |       |         |        |          |         |       |         |       |          |         |      |        |       |          |         |         |         |       |          |         |         |        |       |          |         |         |         |        |          |         |         |          |         |          |          |         |        |        |          |         |  |      |     |     |     |       |       |        |        |          |       |        |       |         |        |          |        |        |       |         |        |          |       |         |       |         |         |          |       |         |       |         |        |          |       |         |      |       |       |         |       |         |         |         |        |          |       |         |         |        |        |         |       |         |         |          |         |          |        |         |         |          |         |         |        |          |         |         |        |         |        |         |      |    |     |          |          |          |
| beta[4]                                                                                                                                                                                                                                                                                                                                                                                                                                                                                                                                                                                                                                                                                                                                                                                                                                                                                                                                                                                                                                                                                                                                                                                                                                                                                                                                                                                                                                                                                                                                                                                                                                                                                                                                                                                                                                                                                                                                                                                                                                                                                                                                                                                                                                                                                                                                                                                                                                                                                                                                                                                                                                                                                                                                                                                                                                                                                                                        | -170.847 | -18.882  | -0.57326 | 16.532         | 85.2987        |       |         |       |          |         |       |         |       |          |         |       |         |        |          |         |       |         |        |          |         |       |         |       |          |         |      |        |       |          |         |         |         |       |          |         |         |        |       |          |         |         |         |        |          |         |         |          |         |          |          |         |        |        |          |         |  |      |     |     |     |       |       |        |        |          |       |        |       |         |        |          |        |        |       |         |        |          |       |         |       |         |         |          |       |         |       |         |        |          |       |         |      |       |       |         |       |         |         |         |        |          |       |         |         |        |        |         |       |         |         |          |         |          |        |         |         |          |         |         |        |          |         |         |        |         |        |         |      |    |     |          |          |          |
| beta[5]                                                                                                                                                                                                                                                                                                                                                                                                                                                                                                                                                                                                                                                                                                                                                                                                                                                                                                                                                                                                                                                                                                                                                                                                                                                                                                                                                                                                                                                                                                                                                                                                                                                                                                                                                                                                                                                                                                                                                                                                                                                                                                                                                                                                                                                                                                                                                                                                                                                                                                                                                                                                                                                                                                                                                                                                                                                                                                                        | -275.011 | -18.383  | 0.08046  | 18.614         | 173.8948       |       |         |       |          |         |       |         |       |          |         |       |         |        |          |         |       |         |        |          |         |       |         |       |          |         |      |        |       |          |         |         |         |       |          |         |         |        |       |          |         |         |         |        |          |         |         |          |         |          |          |         |        |        |          |         |  |      |     |     |     |       |       |        |        |          |       |        |       |         |        |          |        |        |       |         |        |          |       |         |       |         |         |          |       |         |       |         |        |          |       |         |      |       |       |         |       |         |         |         |        |          |       |         |         |        |        |         |       |         |         |          |         |          |        |         |         |          |         |         |        |          |         |         |        |         |        |         |      |    |     |          |          |          |
| beta[6]                                                                                                                                                                                                                                                                                                                                                                                                                                                                                                                                                                                                                                                                                                                                                                                                                                                                                                                                                                                                                                                                                                                                                                                                                                                                                                                                                                                                                                                                                                                                                                                                                                                                                                                                                                                                                                                                                                                                                                                                                                                                                                                                                                                                                                                                                                                                                                                                                                                                                                                                                                                                                                                                                                                                                                                                                                                                                                                        | -23.956  | -6.256   | 1.57100  | 10.131         | 30.8826        |       |         |       |          |         |       |         |       |          |         |       |         |        |          |         |       |         |        |          |         |       |         |       |          |         |      |        |       |          |         |         |         |       |          |         |         |        |       |          |         |         |         |        |          |         |         |          |         |          |          |         |        |        |          |         |  |      |     |     |     |       |       |        |        |          |       |        |       |         |        |          |        |        |       |         |        |          |       |         |       |         |         |          |       |         |       |         |        |          |       |         |      |       |       |         |       |         |         |         |        |          |       |         |         |        |        |         |       |         |         |          |         |          |        |         |         |          |         |         |        |          |         |         |        |         |        |         |      |    |     |          |          |          |
| Dbar                                                                                                                                                                                                                                                                                                                                                                                                                                                                                                                                                                                                                                                                                                                                                                                                                                                                                                                                                                                                                                                                                                                                                                                                                                                                                                                                                                                                                                                                                                                                                                                                                                                                                                                                                                                                                                                                                                                                                                                                                                                                                                                                                                                                                                                                                                                                                                                                                                                                                                                                                                                                                                                                                                                                                                                                                                                                                                                           | pD       | DIC      |          |                |                |       |         |       |          |         |       |         |       |          |         |       |         |        |          |         |       |         |        |          |         |       |         |       |          |         |      |        |       |          |         |         |         |       |          |         |         |        |       |          |         |         |         |        |          |         |         |          |         |          |          |         |        |        |          |         |  |      |     |     |     |       |       |        |        |          |       |        |       |         |        |          |        |        |       |         |        |          |       |         |       |         |         |          |       |         |       |         |        |          |       |         |      |       |       |         |       |         |         |         |        |          |       |         |         |        |        |         |       |         |         |          |         |          |        |         |         |          |         |         |        |          |         |         |        |         |        |         |      |    |     |          |          |          |
| 28.20935                                                                                                                                                                                                                                                                                                                                                                                                                                                                                                                                                                                                                                                                                                                                                                                                                                                                                                                                                                                                                                                                                                                                                                                                                                                                                                                                                                                                                                                                                                                                                                                                                                                                                                                                                                                                                                                                                                                                                                                                                                                                                                                                                                                                                                                                                                                                                                                                                                                                                                                                                                                                                                                                                                                                                                                                                                                                                                                       | 27.55312 | 55.76247 |          |                |                |       |         |       |          |         |       |         |       |          |         |       |         |        |          |         |       |         |        |          |         |       |         |       |          |         |      |        |       |          |         |         |         |       |          |         |         |        |       |          |         |         |         |        |          |         |         |          |         |          |          |         |        |        |          |         |  |      |     |     |     |       |       |        |        |          |       |        |       |         |        |          |        |        |       |         |        |          |       |         |       |         |         |          |       |         |       |         |        |          |       |         |      |       |       |         |       |         |         |         |        |          |       |         |         |        |        |         |       |         |         |          |         |          |        |         |         |          |         |         |        |          |         |         |        |         |        |         |      |    |     |          |          |          |

### Duration

### Intensity

| <p>1. Empirical mean and standard deviation for each variable, plus standard error of the mean:</p> <table border="0"> <thead> <tr> <th></th> <th>Mean</th> <th>SD</th> <th>Naive SE</th> <th>Time-series SE</th> </tr> </thead> <tbody> <tr><td>d.1.2</td><td>0.5798</td><td>6.221</td><td>0.013911</td><td>0.07922</td></tr> <tr><td>d.1.3</td><td>-4.8710</td><td>3.162</td><td>0.007071</td><td>0.01593</td></tr> <tr><td>d.1.4</td><td>-3.9461</td><td>19.878</td><td>0.044449</td><td>1.73929</td></tr> <tr><td>d.1.5</td><td>-3.5579</td><td>15.496</td><td>0.034649</td><td>0.27860</td></tr> <tr><td>d.1.6</td><td>-2.2788</td><td>16.306</td><td>0.036462</td><td>2.40598</td></tr> <tr><td>sd.d</td><td>7.3199</td><td>3.136</td><td>0.007013</td><td>0.09077</td></tr> <tr><td>beta[2]</td><td>-2.6801</td><td>12.542</td><td>0.028046</td><td>1.93115</td></tr> <tr><td>beta[3]</td><td>6.0030</td><td>6.467</td><td>0.014460</td><td>0.37275</td></tr> <tr><td>beta[4]</td><td>-11.0508</td><td>83.599</td><td>0.186932</td><td>7.98800</td></tr> <tr><td>beta[5]</td><td>-0.0343</td><td>98.868</td><td>0.221077</td><td>2.68488</td></tr> <tr><td>beta[6]</td><td>-3.5561</td><td>32.833</td><td>0.073416</td><td>6.70267</td></tr> </tbody> </table> <p>2. Quantiles for each variable:</p> <table border="0"> <thead> <tr> <th></th> <th>2.5%</th> <th>25%</th> <th>50%</th> <th>75%</th> <th>97.5%</th> </tr> </thead> <tbody> <tr><td>d.1.2</td><td>-12.642</td><td>-2.990</td><td>1.090387</td><td>4.403</td><td>12.437</td></tr> <tr><td>d.1.3</td><td>-11.664</td><td>-6.625</td><td>-4.711963</td><td>-3.006</td><td>1.248</td></tr> <tr><td>d.1.4</td><td>-49.308</td><td>-9.394</td><td>-2.052721</td><td>4.820</td><td>26.723</td></tr> <tr><td>d.1.5</td><td>-32.686</td><td>-11.662</td><td>-3.496361</td><td>4.722</td><td>25.820</td></tr> <tr><td>d.1.6</td><td>-36.338</td><td>-12.390</td><td>-2.431034</td><td>7.558</td><td>31.105</td></tr> <tr><td>sd.d</td><td>2.845</td><td>4.995</td><td>6.741931</td><td>9.059</td><td>15.065</td></tr> <tr><td>beta[2]</td><td>-23.372</td><td>-11.841</td><td>-4.044479</td><td>4.519</td><td>19.939</td></tr> <tr><td>beta[3]</td><td>-7.108</td><td>1.855</td><td>6.277181</td><td>10.261</td><td>18.467</td></tr> <tr><td>beta[4]</td><td>-211.099</td><td>-19.997</td><td>-1.247831</td><td>15.342</td><td>109.021</td></tr> <tr><td>beta[5]</td><td>-183.795</td><td>-18.786</td><td>0.003472</td><td>18.632</td><td>176.454</td></tr> <tr><td>beta[6]</td><td>-69.979</td><td>-23.828</td><td>-3.898496</td><td>13.285</td><td>67.490</td></tr> </tbody> </table> <p>-- Model fit (residual deviance):</p> <table border="0"> <thead> <tr> <th>Dbar</th> <th>pD</th> <th>DIC</th> </tr> </thead> <tbody> <tr> <td>28.53632</td> <td>27.84102</td> <td>56.37734</td> </tr> </tbody> </table> <p>28 data points, ratio 1.019, I<sup>2</sup> = 5%</p> |          | Mean     | SD        | Naive SE       | Time-series SE | d.1.2 | 0.5798 | 6.221 | 0.013911 | 0.07922 | d.1.3 | -4.8710 | 3.162 | 0.007071 | 0.01593 | d.1.4 | -3.9461 | 19.878 | 0.044449 | 1.73929 | d.1.5 | -3.5579 | 15.496 | 0.034649 | 0.27860 | d.1.6 | -2.2788 | 16.306 | 0.036462 | 2.40598 | sd.d | 7.3199 | 3.136 | 0.007013 | 0.09077 | beta[2] | -2.6801 | 12.542 | 0.028046 | 1.93115 | beta[3] | 6.0030 | 6.467 | 0.014460 | 0.37275 | beta[4] | -11.0508 | 83.599 | 0.186932 | 7.98800 | beta[5] | -0.0343 | 98.868 | 0.221077 | 2.68488 | beta[6] | -3.5561 | 32.833 | 0.073416 | 6.70267 |  | 2.5% | 25% | 50% | 75% | 97.5% | d.1.2 | -12.642 | -2.990 | 1.090387 | 4.403 | 12.437 | d.1.3 | -11.664 | -6.625 | -4.711963 | -3.006 | 1.248 | d.1.4 | -49.308 | -9.394 | -2.052721 | 4.820 | 26.723 | d.1.5 | -32.686 | -11.662 | -3.496361 | 4.722 | 25.820 | d.1.6 | -36.338 | -12.390 | -2.431034 | 7.558 | 31.105 | sd.d | 2.845 | 4.995 | 6.741931 | 9.059 | 15.065 | beta[2] | -23.372 | -11.841 | -4.044479 | 4.519 | 19.939 | beta[3] | -7.108 | 1.855 | 6.277181 | 10.261 | 18.467 | beta[4] | -211.099 | -19.997 | -1.247831 | 15.342 | 109.021 | beta[5] | -183.795 | -18.786 | 0.003472 | 18.632 | 176.454 | beta[6] | -69.979 | -23.828 | -3.898496 | 13.285 | 67.490 | Dbar | pD | DIC | 28.53632 | 27.84102 | 56.37734 |
|--------------------------------------------------------------------------------------------------------------------------------------------------------------------------------------------------------------------------------------------------------------------------------------------------------------------------------------------------------------------------------------------------------------------------------------------------------------------------------------------------------------------------------------------------------------------------------------------------------------------------------------------------------------------------------------------------------------------------------------------------------------------------------------------------------------------------------------------------------------------------------------------------------------------------------------------------------------------------------------------------------------------------------------------------------------------------------------------------------------------------------------------------------------------------------------------------------------------------------------------------------------------------------------------------------------------------------------------------------------------------------------------------------------------------------------------------------------------------------------------------------------------------------------------------------------------------------------------------------------------------------------------------------------------------------------------------------------------------------------------------------------------------------------------------------------------------------------------------------------------------------------------------------------------------------------------------------------------------------------------------------------------------------------------------------------------------------------------------------------------------------------------------------------------------------------------------------------------------------------------------------------------------------------------------------------------------------------------------------------------------------------------------------------------------------------------------------------------------------------------------------------------------------------------------------------------------------------------------------------------------------------------------------------------------------------------------------------------------------------------------------------------------------------------------------------------------------------------------------------------------------------------------------------------------------------|----------|----------|-----------|----------------|----------------|-------|--------|-------|----------|---------|-------|---------|-------|----------|---------|-------|---------|--------|----------|---------|-------|---------|--------|----------|---------|-------|---------|--------|----------|---------|------|--------|-------|----------|---------|---------|---------|--------|----------|---------|---------|--------|-------|----------|---------|---------|----------|--------|----------|---------|---------|---------|--------|----------|---------|---------|---------|--------|----------|---------|--|------|-----|-----|-----|-------|-------|---------|--------|----------|-------|--------|-------|---------|--------|-----------|--------|-------|-------|---------|--------|-----------|-------|--------|-------|---------|---------|-----------|-------|--------|-------|---------|---------|-----------|-------|--------|------|-------|-------|----------|-------|--------|---------|---------|---------|-----------|-------|--------|---------|--------|-------|----------|--------|--------|---------|----------|---------|-----------|--------|---------|---------|----------|---------|----------|--------|---------|---------|---------|---------|-----------|--------|--------|------|----|-----|----------|----------|----------|
|                                                                                                                                                                                                                                                                                                                                                                                                                                                                                                                                                                                                                                                                                                                                                                                                                                                                                                                                                                                                                                                                                                                                                                                                                                                                                                                                                                                                                                                                                                                                                                                                                                                                                                                                                                                                                                                                                                                                                                                                                                                                                                                                                                                                                                                                                                                                                                                                                                                                                                                                                                                                                                                                                                                                                                                                                                                                                                                                      | Mean     | SD       | Naive SE  | Time-series SE |                |       |        |       |          |         |       |         |       |          |         |       |         |        |          |         |       |         |        |          |         |       |         |        |          |         |      |        |       |          |         |         |         |        |          |         |         |        |       |          |         |         |          |        |          |         |         |         |        |          |         |         |         |        |          |         |  |      |     |     |     |       |       |         |        |          |       |        |       |         |        |           |        |       |       |         |        |           |       |        |       |         |         |           |       |        |       |         |         |           |       |        |      |       |       |          |       |        |         |         |         |           |       |        |         |        |       |          |        |        |         |          |         |           |        |         |         |          |         |          |        |         |         |         |         |           |        |        |      |    |     |          |          |          |
| d.1.2                                                                                                                                                                                                                                                                                                                                                                                                                                                                                                                                                                                                                                                                                                                                                                                                                                                                                                                                                                                                                                                                                                                                                                                                                                                                                                                                                                                                                                                                                                                                                                                                                                                                                                                                                                                                                                                                                                                                                                                                                                                                                                                                                                                                                                                                                                                                                                                                                                                                                                                                                                                                                                                                                                                                                                                                                                                                                                                                | 0.5798   | 6.221    | 0.013911  | 0.07922        |                |       |        |       |          |         |       |         |       |          |         |       |         |        |          |         |       |         |        |          |         |       |         |        |          |         |      |        |       |          |         |         |         |        |          |         |         |        |       |          |         |         |          |        |          |         |         |         |        |          |         |         |         |        |          |         |  |      |     |     |     |       |       |         |        |          |       |        |       |         |        |           |        |       |       |         |        |           |       |        |       |         |         |           |       |        |       |         |         |           |       |        |      |       |       |          |       |        |         |         |         |           |       |        |         |        |       |          |        |        |         |          |         |           |        |         |         |          |         |          |        |         |         |         |         |           |        |        |      |    |     |          |          |          |
| d.1.3                                                                                                                                                                                                                                                                                                                                                                                                                                                                                                                                                                                                                                                                                                                                                                                                                                                                                                                                                                                                                                                                                                                                                                                                                                                                                                                                                                                                                                                                                                                                                                                                                                                                                                                                                                                                                                                                                                                                                                                                                                                                                                                                                                                                                                                                                                                                                                                                                                                                                                                                                                                                                                                                                                                                                                                                                                                                                                                                | -4.8710  | 3.162    | 0.007071  | 0.01593        |                |       |        |       |          |         |       |         |       |          |         |       |         |        |          |         |       |         |        |          |         |       |         |        |          |         |      |        |       |          |         |         |         |        |          |         |         |        |       |          |         |         |          |        |          |         |         |         |        |          |         |         |         |        |          |         |  |      |     |     |     |       |       |         |        |          |       |        |       |         |        |           |        |       |       |         |        |           |       |        |       |         |         |           |       |        |       |         |         |           |       |        |      |       |       |          |       |        |         |         |         |           |       |        |         |        |       |          |        |        |         |          |         |           |        |         |         |          |         |          |        |         |         |         |         |           |        |        |      |    |     |          |          |          |
| d.1.4                                                                                                                                                                                                                                                                                                                                                                                                                                                                                                                                                                                                                                                                                                                                                                                                                                                                                                                                                                                                                                                                                                                                                                                                                                                                                                                                                                                                                                                                                                                                                                                                                                                                                                                                                                                                                                                                                                                                                                                                                                                                                                                                                                                                                                                                                                                                                                                                                                                                                                                                                                                                                                                                                                                                                                                                                                                                                                                                | -3.9461  | 19.878   | 0.044449  | 1.73929        |                |       |        |       |          |         |       |         |       |          |         |       |         |        |          |         |       |         |        |          |         |       |         |        |          |         |      |        |       |          |         |         |         |        |          |         |         |        |       |          |         |         |          |        |          |         |         |         |        |          |         |         |         |        |          |         |  |      |     |     |     |       |       |         |        |          |       |        |       |         |        |           |        |       |       |         |        |           |       |        |       |         |         |           |       |        |       |         |         |           |       |        |      |       |       |          |       |        |         |         |         |           |       |        |         |        |       |          |        |        |         |          |         |           |        |         |         |          |         |          |        |         |         |         |         |           |        |        |      |    |     |          |          |          |
| d.1.5                                                                                                                                                                                                                                                                                                                                                                                                                                                                                                                                                                                                                                                                                                                                                                                                                                                                                                                                                                                                                                                                                                                                                                                                                                                                                                                                                                                                                                                                                                                                                                                                                                                                                                                                                                                                                                                                                                                                                                                                                                                                                                                                                                                                                                                                                                                                                                                                                                                                                                                                                                                                                                                                                                                                                                                                                                                                                                                                | -3.5579  | 15.496   | 0.034649  | 0.27860        |                |       |        |       |          |         |       |         |       |          |         |       |         |        |          |         |       |         |        |          |         |       |         |        |          |         |      |        |       |          |         |         |         |        |          |         |         |        |       |          |         |         |          |        |          |         |         |         |        |          |         |         |         |        |          |         |  |      |     |     |     |       |       |         |        |          |       |        |       |         |        |           |        |       |       |         |        |           |       |        |       |         |         |           |       |        |       |         |         |           |       |        |      |       |       |          |       |        |         |         |         |           |       |        |         |        |       |          |        |        |         |          |         |           |        |         |         |          |         |          |        |         |         |         |         |           |        |        |      |    |     |          |          |          |
| d.1.6                                                                                                                                                                                                                                                                                                                                                                                                                                                                                                                                                                                                                                                                                                                                                                                                                                                                                                                                                                                                                                                                                                                                                                                                                                                                                                                                                                                                                                                                                                                                                                                                                                                                                                                                                                                                                                                                                                                                                                                                                                                                                                                                                                                                                                                                                                                                                                                                                                                                                                                                                                                                                                                                                                                                                                                                                                                                                                                                | -2.2788  | 16.306   | 0.036462  | 2.40598        |                |       |        |       |          |         |       |         |       |          |         |       |         |        |          |         |       |         |        |          |         |       |         |        |          |         |      |        |       |          |         |         |         |        |          |         |         |        |       |          |         |         |          |        |          |         |         |         |        |          |         |         |         |        |          |         |  |      |     |     |     |       |       |         |        |          |       |        |       |         |        |           |        |       |       |         |        |           |       |        |       |         |         |           |       |        |       |         |         |           |       |        |      |       |       |          |       |        |         |         |         |           |       |        |         |        |       |          |        |        |         |          |         |           |        |         |         |          |         |          |        |         |         |         |         |           |        |        |      |    |     |          |          |          |
| sd.d                                                                                                                                                                                                                                                                                                                                                                                                                                                                                                                                                                                                                                                                                                                                                                                                                                                                                                                                                                                                                                                                                                                                                                                                                                                                                                                                                                                                                                                                                                                                                                                                                                                                                                                                                                                                                                                                                                                                                                                                                                                                                                                                                                                                                                                                                                                                                                                                                                                                                                                                                                                                                                                                                                                                                                                                                                                                                                                                 | 7.3199   | 3.136    | 0.007013  | 0.09077        |                |       |        |       |          |         |       |         |       |          |         |       |         |        |          |         |       |         |        |          |         |       |         |        |          |         |      |        |       |          |         |         |         |        |          |         |         |        |       |          |         |         |          |        |          |         |         |         |        |          |         |         |         |        |          |         |  |      |     |     |     |       |       |         |        |          |       |        |       |         |        |           |        |       |       |         |        |           |       |        |       |         |         |           |       |        |       |         |         |           |       |        |      |       |       |          |       |        |         |         |         |           |       |        |         |        |       |          |        |        |         |          |         |           |        |         |         |          |         |          |        |         |         |         |         |           |        |        |      |    |     |          |          |          |
| beta[2]                                                                                                                                                                                                                                                                                                                                                                                                                                                                                                                                                                                                                                                                                                                                                                                                                                                                                                                                                                                                                                                                                                                                                                                                                                                                                                                                                                                                                                                                                                                                                                                                                                                                                                                                                                                                                                                                                                                                                                                                                                                                                                                                                                                                                                                                                                                                                                                                                                                                                                                                                                                                                                                                                                                                                                                                                                                                                                                              | -2.6801  | 12.542   | 0.028046  | 1.93115        |                |       |        |       |          |         |       |         |       |          |         |       |         |        |          |         |       |         |        |          |         |       |         |        |          |         |      |        |       |          |         |         |         |        |          |         |         |        |       |          |         |         |          |        |          |         |         |         |        |          |         |         |         |        |          |         |  |      |     |     |     |       |       |         |        |          |       |        |       |         |        |           |        |       |       |         |        |           |       |        |       |         |         |           |       |        |       |         |         |           |       |        |      |       |       |          |       |        |         |         |         |           |       |        |         |        |       |          |        |        |         |          |         |           |        |         |         |          |         |          |        |         |         |         |         |           |        |        |      |    |     |          |          |          |
| beta[3]                                                                                                                                                                                                                                                                                                                                                                                                                                                                                                                                                                                                                                                                                                                                                                                                                                                                                                                                                                                                                                                                                                                                                                                                                                                                                                                                                                                                                                                                                                                                                                                                                                                                                                                                                                                                                                                                                                                                                                                                                                                                                                                                                                                                                                                                                                                                                                                                                                                                                                                                                                                                                                                                                                                                                                                                                                                                                                                              | 6.0030   | 6.467    | 0.014460  | 0.37275        |                |       |        |       |          |         |       |         |       |          |         |       |         |        |          |         |       |         |        |          |         |       |         |        |          |         |      |        |       |          |         |         |         |        |          |         |         |        |       |          |         |         |          |        |          |         |         |         |        |          |         |         |         |        |          |         |  |      |     |     |     |       |       |         |        |          |       |        |       |         |        |           |        |       |       |         |        |           |       |        |       |         |         |           |       |        |       |         |         |           |       |        |      |       |       |          |       |        |         |         |         |           |       |        |         |        |       |          |        |        |         |          |         |           |        |         |         |          |         |          |        |         |         |         |         |           |        |        |      |    |     |          |          |          |
| beta[4]                                                                                                                                                                                                                                                                                                                                                                                                                                                                                                                                                                                                                                                                                                                                                                                                                                                                                                                                                                                                                                                                                                                                                                                                                                                                                                                                                                                                                                                                                                                                                                                                                                                                                                                                                                                                                                                                                                                                                                                                                                                                                                                                                                                                                                                                                                                                                                                                                                                                                                                                                                                                                                                                                                                                                                                                                                                                                                                              | -11.0508 | 83.599   | 0.186932  | 7.98800        |                |       |        |       |          |         |       |         |       |          |         |       |         |        |          |         |       |         |        |          |         |       |         |        |          |         |      |        |       |          |         |         |         |        |          |         |         |        |       |          |         |         |          |        |          |         |         |         |        |          |         |         |         |        |          |         |  |      |     |     |     |       |       |         |        |          |       |        |       |         |        |           |        |       |       |         |        |           |       |        |       |         |         |           |       |        |       |         |         |           |       |        |      |       |       |          |       |        |         |         |         |           |       |        |         |        |       |          |        |        |         |          |         |           |        |         |         |          |         |          |        |         |         |         |         |           |        |        |      |    |     |          |          |          |
| beta[5]                                                                                                                                                                                                                                                                                                                                                                                                                                                                                                                                                                                                                                                                                                                                                                                                                                                                                                                                                                                                                                                                                                                                                                                                                                                                                                                                                                                                                                                                                                                                                                                                                                                                                                                                                                                                                                                                                                                                                                                                                                                                                                                                                                                                                                                                                                                                                                                                                                                                                                                                                                                                                                                                                                                                                                                                                                                                                                                              | -0.0343  | 98.868   | 0.221077  | 2.68488        |                |       |        |       |          |         |       |         |       |          |         |       |         |        |          |         |       |         |        |          |         |       |         |        |          |         |      |        |       |          |         |         |         |        |          |         |         |        |       |          |         |         |          |        |          |         |         |         |        |          |         |         |         |        |          |         |  |      |     |     |     |       |       |         |        |          |       |        |       |         |        |           |        |       |       |         |        |           |       |        |       |         |         |           |       |        |       |         |         |           |       |        |      |       |       |          |       |        |         |         |         |           |       |        |         |        |       |          |        |        |         |          |         |           |        |         |         |          |         |          |        |         |         |         |         |           |        |        |      |    |     |          |          |          |
| beta[6]                                                                                                                                                                                                                                                                                                                                                                                                                                                                                                                                                                                                                                                                                                                                                                                                                                                                                                                                                                                                                                                                                                                                                                                                                                                                                                                                                                                                                                                                                                                                                                                                                                                                                                                                                                                                                                                                                                                                                                                                                                                                                                                                                                                                                                                                                                                                                                                                                                                                                                                                                                                                                                                                                                                                                                                                                                                                                                                              | -3.5561  | 32.833   | 0.073416  | 6.70267        |                |       |        |       |          |         |       |         |       |          |         |       |         |        |          |         |       |         |        |          |         |       |         |        |          |         |      |        |       |          |         |         |         |        |          |         |         |        |       |          |         |         |          |        |          |         |         |         |        |          |         |         |         |        |          |         |  |      |     |     |     |       |       |         |        |          |       |        |       |         |        |           |        |       |       |         |        |           |       |        |       |         |         |           |       |        |       |         |         |           |       |        |      |       |       |          |       |        |         |         |         |           |       |        |         |        |       |          |        |        |         |          |         |           |        |         |         |          |         |          |        |         |         |         |         |           |        |        |      |    |     |          |          |          |
|                                                                                                                                                                                                                                                                                                                                                                                                                                                                                                                                                                                                                                                                                                                                                                                                                                                                                                                                                                                                                                                                                                                                                                                                                                                                                                                                                                                                                                                                                                                                                                                                                                                                                                                                                                                                                                                                                                                                                                                                                                                                                                                                                                                                                                                                                                                                                                                                                                                                                                                                                                                                                                                                                                                                                                                                                                                                                                                                      | 2.5%     | 25%      | 50%       | 75%            | 97.5%          |       |        |       |          |         |       |         |       |          |         |       |         |        |          |         |       |         |        |          |         |       |         |        |          |         |      |        |       |          |         |         |         |        |          |         |         |        |       |          |         |         |          |        |          |         |         |         |        |          |         |         |         |        |          |         |  |      |     |     |     |       |       |         |        |          |       |        |       |         |        |           |        |       |       |         |        |           |       |        |       |         |         |           |       |        |       |         |         |           |       |        |      |       |       |          |       |        |         |         |         |           |       |        |         |        |       |          |        |        |         |          |         |           |        |         |         |          |         |          |        |         |         |         |         |           |        |        |      |    |     |          |          |          |
| d.1.2                                                                                                                                                                                                                                                                                                                                                                                                                                                                                                                                                                                                                                                                                                                                                                                                                                                                                                                                                                                                                                                                                                                                                                                                                                                                                                                                                                                                                                                                                                                                                                                                                                                                                                                                                                                                                                                                                                                                                                                                                                                                                                                                                                                                                                                                                                                                                                                                                                                                                                                                                                                                                                                                                                                                                                                                                                                                                                                                | -12.642  | -2.990   | 1.090387  | 4.403          | 12.437         |       |        |       |          |         |       |         |       |          |         |       |         |        |          |         |       |         |        |          |         |       |         |        |          |         |      |        |       |          |         |         |         |        |          |         |         |        |       |          |         |         |          |        |          |         |         |         |        |          |         |         |         |        |          |         |  |      |     |     |     |       |       |         |        |          |       |        |       |         |        |           |        |       |       |         |        |           |       |        |       |         |         |           |       |        |       |         |         |           |       |        |      |       |       |          |       |        |         |         |         |           |       |        |         |        |       |          |        |        |         |          |         |           |        |         |         |          |         |          |        |         |         |         |         |           |        |        |      |    |     |          |          |          |
| d.1.3                                                                                                                                                                                                                                                                                                                                                                                                                                                                                                                                                                                                                                                                                                                                                                                                                                                                                                                                                                                                                                                                                                                                                                                                                                                                                                                                                                                                                                                                                                                                                                                                                                                                                                                                                                                                                                                                                                                                                                                                                                                                                                                                                                                                                                                                                                                                                                                                                                                                                                                                                                                                                                                                                                                                                                                                                                                                                                                                | -11.664  | -6.625   | -4.711963 | -3.006         | 1.248          |       |        |       |          |         |       |         |       |          |         |       |         |        |          |         |       |         |        |          |         |       |         |        |          |         |      |        |       |          |         |         |         |        |          |         |         |        |       |          |         |         |          |        |          |         |         |         |        |          |         |         |         |        |          |         |  |      |     |     |     |       |       |         |        |          |       |        |       |         |        |           |        |       |       |         |        |           |       |        |       |         |         |           |       |        |       |         |         |           |       |        |      |       |       |          |       |        |         |         |         |           |       |        |         |        |       |          |        |        |         |          |         |           |        |         |         |          |         |          |        |         |         |         |         |           |        |        |      |    |     |          |          |          |
| d.1.4                                                                                                                                                                                                                                                                                                                                                                                                                                                                                                                                                                                                                                                                                                                                                                                                                                                                                                                                                                                                                                                                                                                                                                                                                                                                                                                                                                                                                                                                                                                                                                                                                                                                                                                                                                                                                                                                                                                                                                                                                                                                                                                                                                                                                                                                                                                                                                                                                                                                                                                                                                                                                                                                                                                                                                                                                                                                                                                                | -49.308  | -9.394   | -2.052721 | 4.820          | 26.723         |       |        |       |          |         |       |         |       |          |         |       |         |        |          |         |       |         |        |          |         |       |         |        |          |         |      |        |       |          |         |         |         |        |          |         |         |        |       |          |         |         |          |        |          |         |         |         |        |          |         |         |         |        |          |         |  |      |     |     |     |       |       |         |        |          |       |        |       |         |        |           |        |       |       |         |        |           |       |        |       |         |         |           |       |        |       |         |         |           |       |        |      |       |       |          |       |        |         |         |         |           |       |        |         |        |       |          |        |        |         |          |         |           |        |         |         |          |         |          |        |         |         |         |         |           |        |        |      |    |     |          |          |          |
| d.1.5                                                                                                                                                                                                                                                                                                                                                                                                                                                                                                                                                                                                                                                                                                                                                                                                                                                                                                                                                                                                                                                                                                                                                                                                                                                                                                                                                                                                                                                                                                                                                                                                                                                                                                                                                                                                                                                                                                                                                                                                                                                                                                                                                                                                                                                                                                                                                                                                                                                                                                                                                                                                                                                                                                                                                                                                                                                                                                                                | -32.686  | -11.662  | -3.496361 | 4.722          | 25.820         |       |        |       |          |         |       |         |       |          |         |       |         |        |          |         |       |         |        |          |         |       |         |        |          |         |      |        |       |          |         |         |         |        |          |         |         |        |       |          |         |         |          |        |          |         |         |         |        |          |         |         |         |        |          |         |  |      |     |     |     |       |       |         |        |          |       |        |       |         |        |           |        |       |       |         |        |           |       |        |       |         |         |           |       |        |       |         |         |           |       |        |      |       |       |          |       |        |         |         |         |           |       |        |         |        |       |          |        |        |         |          |         |           |        |         |         |          |         |          |        |         |         |         |         |           |        |        |      |    |     |          |          |          |
| d.1.6                                                                                                                                                                                                                                                                                                                                                                                                                                                                                                                                                                                                                                                                                                                                                                                                                                                                                                                                                                                                                                                                                                                                                                                                                                                                                                                                                                                                                                                                                                                                                                                                                                                                                                                                                                                                                                                                                                                                                                                                                                                                                                                                                                                                                                                                                                                                                                                                                                                                                                                                                                                                                                                                                                                                                                                                                                                                                                                                | -36.338  | -12.390  | -2.431034 | 7.558          | 31.105         |       |        |       |          |         |       |         |       |          |         |       |         |        |          |         |       |         |        |          |         |       |         |        |          |         |      |        |       |          |         |         |         |        |          |         |         |        |       |          |         |         |          |        |          |         |         |         |        |          |         |         |         |        |          |         |  |      |     |     |     |       |       |         |        |          |       |        |       |         |        |           |        |       |       |         |        |           |       |        |       |         |         |           |       |        |       |         |         |           |       |        |      |       |       |          |       |        |         |         |         |           |       |        |         |        |       |          |        |        |         |          |         |           |        |         |         |          |         |          |        |         |         |         |         |           |        |        |      |    |     |          |          |          |
| sd.d                                                                                                                                                                                                                                                                                                                                                                                                                                                                                                                                                                                                                                                                                                                                                                                                                                                                                                                                                                                                                                                                                                                                                                                                                                                                                                                                                                                                                                                                                                                                                                                                                                                                                                                                                                                                                                                                                                                                                                                                                                                                                                                                                                                                                                                                                                                                                                                                                                                                                                                                                                                                                                                                                                                                                                                                                                                                                                                                 | 2.845    | 4.995    | 6.741931  | 9.059          | 15.065         |       |        |       |          |         |       |         |       |          |         |       |         |        |          |         |       |         |        |          |         |       |         |        |          |         |      |        |       |          |         |         |         |        |          |         |         |        |       |          |         |         |          |        |          |         |         |         |        |          |         |         |         |        |          |         |  |      |     |     |     |       |       |         |        |          |       |        |       |         |        |           |        |       |       |         |        |           |       |        |       |         |         |           |       |        |       |         |         |           |       |        |      |       |       |          |       |        |         |         |         |           |       |        |         |        |       |          |        |        |         |          |         |           |        |         |         |          |         |          |        |         |         |         |         |           |        |        |      |    |     |          |          |          |
| beta[2]                                                                                                                                                                                                                                                                                                                                                                                                                                                                                                                                                                                                                                                                                                                                                                                                                                                                                                                                                                                                                                                                                                                                                                                                                                                                                                                                                                                                                                                                                                                                                                                                                                                                                                                                                                                                                                                                                                                                                                                                                                                                                                                                                                                                                                                                                                                                                                                                                                                                                                                                                                                                                                                                                                                                                                                                                                                                                                                              | -23.372  | -11.841  | -4.044479 | 4.519          | 19.939         |       |        |       |          |         |       |         |       |          |         |       |         |        |          |         |       |         |        |          |         |       |         |        |          |         |      |        |       |          |         |         |         |        |          |         |         |        |       |          |         |         |          |        |          |         |         |         |        |          |         |         |         |        |          |         |  |      |     |     |     |       |       |         |        |          |       |        |       |         |        |           |        |       |       |         |        |           |       |        |       |         |         |           |       |        |       |         |         |           |       |        |      |       |       |          |       |        |         |         |         |           |       |        |         |        |       |          |        |        |         |          |         |           |        |         |         |          |         |          |        |         |         |         |         |           |        |        |      |    |     |          |          |          |
| beta[3]                                                                                                                                                                                                                                                                                                                                                                                                                                                                                                                                                                                                                                                                                                                                                                                                                                                                                                                                                                                                                                                                                                                                                                                                                                                                                                                                                                                                                                                                                                                                                                                                                                                                                                                                                                                                                                                                                                                                                                                                                                                                                                                                                                                                                                                                                                                                                                                                                                                                                                                                                                                                                                                                                                                                                                                                                                                                                                                              | -7.108   | 1.855    | 6.277181  | 10.261         | 18.467         |       |        |       |          |         |       |         |       |          |         |       |         |        |          |         |       |         |        |          |         |       |         |        |          |         |      |        |       |          |         |         |         |        |          |         |         |        |       |          |         |         |          |        |          |         |         |         |        |          |         |         |         |        |          |         |  |      |     |     |     |       |       |         |        |          |       |        |       |         |        |           |        |       |       |         |        |           |       |        |       |         |         |           |       |        |       |         |         |           |       |        |      |       |       |          |       |        |         |         |         |           |       |        |         |        |       |          |        |        |         |          |         |           |        |         |         |          |         |          |        |         |         |         |         |           |        |        |      |    |     |          |          |          |
| beta[4]                                                                                                                                                                                                                                                                                                                                                                                                                                                                                                                                                                                                                                                                                                                                                                                                                                                                                                                                                                                                                                                                                                                                                                                                                                                                                                                                                                                                                                                                                                                                                                                                                                                                                                                                                                                                                                                                                                                                                                                                                                                                                                                                                                                                                                                                                                                                                                                                                                                                                                                                                                                                                                                                                                                                                                                                                                                                                                                              | -211.099 | -19.997  | -1.247831 | 15.342         | 109.021        |       |        |       |          |         |       |         |       |          |         |       |         |        |          |         |       |         |        |          |         |       |         |        |          |         |      |        |       |          |         |         |         |        |          |         |         |        |       |          |         |         |          |        |          |         |         |         |        |          |         |         |         |        |          |         |  |      |     |     |     |       |       |         |        |          |       |        |       |         |        |           |        |       |       |         |        |           |       |        |       |         |         |           |       |        |       |         |         |           |       |        |      |       |       |          |       |        |         |         |         |           |       |        |         |        |       |          |        |        |         |          |         |           |        |         |         |          |         |          |        |         |         |         |         |           |        |        |      |    |     |          |          |          |
| beta[5]                                                                                                                                                                                                                                                                                                                                                                                                                                                                                                                                                                                                                                                                                                                                                                                                                                                                                                                                                                                                                                                                                                                                                                                                                                                                                                                                                                                                                                                                                                                                                                                                                                                                                                                                                                                                                                                                                                                                                                                                                                                                                                                                                                                                                                                                                                                                                                                                                                                                                                                                                                                                                                                                                                                                                                                                                                                                                                                              | -183.795 | -18.786  | 0.003472  | 18.632         | 176.454        |       |        |       |          |         |       |         |       |          |         |       |         |        |          |         |       |         |        |          |         |       |         |        |          |         |      |        |       |          |         |         |         |        |          |         |         |        |       |          |         |         |          |        |          |         |         |         |        |          |         |         |         |        |          |         |  |      |     |     |     |       |       |         |        |          |       |        |       |         |        |           |        |       |       |         |        |           |       |        |       |         |         |           |       |        |       |         |         |           |       |        |      |       |       |          |       |        |         |         |         |           |       |        |         |        |       |          |        |        |         |          |         |           |        |         |         |          |         |          |        |         |         |         |         |           |        |        |      |    |     |          |          |          |
| beta[6]                                                                                                                                                                                                                                                                                                                                                                                                                                                                                                                                                                                                                                                                                                                                                                                                                                                                                                                                                                                                                                                                                                                                                                                                                                                                                                                                                                                                                                                                                                                                                                                                                                                                                                                                                                                                                                                                                                                                                                                                                                                                                                                                                                                                                                                                                                                                                                                                                                                                                                                                                                                                                                                                                                                                                                                                                                                                                                                              | -69.979  | -23.828  | -3.898496 | 13.285         | 67.490         |       |        |       |          |         |       |         |       |          |         |       |         |        |          |         |       |         |        |          |         |       |         |        |          |         |      |        |       |          |         |         |         |        |          |         |         |        |       |          |         |         |          |        |          |         |         |         |        |          |         |         |         |        |          |         |  |      |     |     |     |       |       |         |        |          |       |        |       |         |        |           |        |       |       |         |        |           |       |        |       |         |         |           |       |        |       |         |         |           |       |        |      |       |       |          |       |        |         |         |         |           |       |        |         |        |       |          |        |        |         |          |         |           |        |         |         |          |         |          |        |         |         |         |         |           |        |        |      |    |     |          |          |          |
| Dbar                                                                                                                                                                                                                                                                                                                                                                                                                                                                                                                                                                                                                                                                                                                                                                                                                                                                                                                                                                                                                                                                                                                                                                                                                                                                                                                                                                                                                                                                                                                                                                                                                                                                                                                                                                                                                                                                                                                                                                                                                                                                                                                                                                                                                                                                                                                                                                                                                                                                                                                                                                                                                                                                                                                                                                                                                                                                                                                                 | pD       | DIC      |           |                |                |       |        |       |          |         |       |         |       |          |         |       |         |        |          |         |       |         |        |          |         |       |         |        |          |         |      |        |       |          |         |         |         |        |          |         |         |        |       |          |         |         |          |        |          |         |         |         |        |          |         |         |         |        |          |         |  |      |     |     |     |       |       |         |        |          |       |        |       |         |        |           |        |       |       |         |        |           |       |        |       |         |         |           |       |        |       |         |         |           |       |        |      |       |       |          |       |        |         |         |         |           |       |        |         |        |       |          |        |        |         |          |         |           |        |         |         |          |         |          |        |         |         |         |         |           |        |        |      |    |     |          |          |          |
| 28.53632                                                                                                                                                                                                                                                                                                                                                                                                                                                                                                                                                                                                                                                                                                                                                                                                                                                                                                                                                                                                                                                                                                                                                                                                                                                                                                                                                                                                                                                                                                                                                                                                                                                                                                                                                                                                                                                                                                                                                                                                                                                                                                                                                                                                                                                                                                                                                                                                                                                                                                                                                                                                                                                                                                                                                                                                                                                                                                                             | 27.84102 | 56.37734 |           |                |                |       |        |       |          |         |       |         |       |          |         |       |         |        |          |         |       |         |        |          |         |       |         |        |          |         |      |        |       |          |         |         |         |        |          |         |         |        |       |          |         |         |          |        |          |         |         |         |        |          |         |         |         |        |          |         |  |      |     |     |     |       |       |         |        |          |       |        |       |         |        |           |        |       |       |         |        |           |       |        |       |         |         |           |       |        |       |         |         |           |       |        |      |       |       |          |       |        |         |         |         |           |       |        |         |        |       |          |        |        |         |          |         |           |        |         |         |          |         |          |        |         |         |         |         |           |        |        |      |    |     |          |          |          |

### Length

Figure S25 The results of meta-regression analyses for inattention

1. Empirical mean and standard deviation for each variable, plus standard error of the mean:

|         | Mean      | SD      | Naive SE | Time-series SE |
|---------|-----------|---------|----------|----------------|
| d.1.2   | -765.7497 | 322.75  | 0.7217   | 0.5181         |
| d.1.3   | 203.0258  | 207.01  | 0.4629   | 1.2455         |
| d.1.4   | 0.8808    | 384.68  | 0.8602   | 1.0512         |
| d.1.5   | 175.6291  | 384.45  | 0.8597   | 1.5661         |
| d.1.6   | -331.2501 | 304.22  | 0.6803   | 0.7678         |
| sd.d    | 381.5777  | 53.02   | 0.1186   | 0.2129         |
| beta[2] | 1375.8814 | 448.10  | 1.0020   | 3.1573         |
| beta[3] | 830.3693  | 460.35  | 1.0294   | 45.8009        |
| beta[4] | -55.5421  | 698.51  | 1.5619   | 71.9162        |
| beta[5] | -102.8309 | 680.50  | 1.5216   | 37.4808        |
| beta[6] | -460.6770 | 1615.18 | 3.6116   | 111.4816       |

2. Quantiles for each variable:

|         | 2.5%    | 25%     | 50%       | 75%    | 97.5%  |
|---------|---------|---------|-----------|--------|--------|
| d.1.2   | -1335.8 | -1005.4 | -796.2192 | -519.4 | -147.5 |
| d.1.3   | -203.8  | 65.5    | 203.1539  | 338.5  | 615.2  |
| d.1.4   | -762.2  | -252.2  | 0.9565    | 254.4  | 763.0  |
| d.1.5   | -501.4  | -93.7   | 134.8288  | 426.4  | 985.9  |
| d.1.6   | -949.2  | -529.6  | -322.8615 | -126.2 | 249.0  |
| sd.d    | 238.8   | 360.9   | 399.2422  | 420.7  | 435.0  |
| beta[2] | 650.0   | 1161.0  | 1517.6509 | 1741.3 | 1810.6 |
| beta[3] | 128.8   | 453.2   | 761.3566  | 1169.4 | 1698.0 |
| beta[4] | -1774.5 | -326.8  | -12.0002  | 274.6  | 1220.2 |
| beta[5] | -864.3  | -663.3  | -322.2507 | 305.4  | 1192.8 |
| beta[6] | -3464.2 | -1242.0 | -172.9161 | 896.6  | 1667.1 |

-- Model fit (residual deviance):

| Dbar     | pD       | DIC      |
|----------|----------|----------|
| 26.01698 | 26.01658 | 52.03356 |

26 data points, ratio 1.001, I<sup>2</sup> = 4%

### Frequency

1. Empirical mean and standard deviation for each variable, plus standard error of the mean:

|         | Mean     | SD      | Naive SE | Time-series SE |
|---------|----------|---------|----------|----------------|
| d.1.2   | -26.842  | 169.88  | 0.3799   | 0.4086         |
| d.1.3   | -162.220 | 167.77  | 0.3751   | 0.7733         |
| d.1.4   | -55.765  | 525.68  | 1.1755   | 8.5620         |
| d.1.5   | 439.904  | 311.04  | 0.6955   | 4.3656         |
| d.1.6   | 1.387    | 225.76  | 0.5048   | 0.5456         |
| sd.d    | 262.084  | 90.78   | 0.2030   | 0.8559         |
| beta[2] | 20.985   | 349.57  | 0.7817   | 10.4803        |
| beta[3] | 408.895  | 299.34  | 0.6693   | 17.1421        |
| beta[4] | -220.677 | 1784.66 | 3.9906   | 194.7646       |
| beta[5] | 455.421  | 496.60  | 1.1104   | 47.9472        |
| beta[6] | -369.315 | 353.20  | 0.7898   | 15.4733        |

2. Quantiles for each variable:

|         | 2.5%    | 25%     | 50%      | 75%    | 97.5%  |
|---------|---------|---------|----------|--------|--------|
| d.1.2   | -353.3  | -143.75 | -24.250  | 84.83  | 310.3  |
| d.1.3   | -563.0  | -246.13 | -133.269 | -52.17 | 109.0  |
| d.1.4   | -1186.2 | -332.20 | 6.694    | 253.91 | 935.2  |
| d.1.5   | -121.1  | 201.42  | 450.003  | 666.08 | 1029.2 |
| d.1.6   | -433.6  | -145.70 | -4.027   | 140.90 | 468.0  |
| sd.d    | 115.0   | 187.13  | 251.741  | 338.35 | 425.5  |
| beta[2] | -583.3  | -66.85  | 132.169  | 262.04 | 370.7  |
| beta[3] | 115.0   | 199.17  | 259.590  | 548.78 | 960.3  |
| beta[4] | -4239.0 | -924.02 | 118.404  | 852.48 | 2289.1 |
| beta[5] | -448.3  | -11.21  | 647.521  | 871.86 | 1056.2 |
| beta[6] | -874.9  | -671.06 | -354.544 | -97.13 | 191.0  |

-- Model fit (residual deviance):

| Dbar     | pD       | DIC      |
|----------|----------|----------|
| 25.99193 | 25.99003 | 51.98196 |

26 data points, ratio 0.9997, I<sup>2</sup> = 4%

### Duration

1. Empirical mean and standard deviation for each variable, plus standard error of the mean:

|         | Mean     | SD     | Naive SE | Time-series SE |
|---------|----------|--------|----------|----------------|
| d.1.2   | 132.762  | 209.6  | 0.4688   | 0.4453         |
| d.1.3   | -12.647  | 144.6  | 0.3234   | 0.3232         |
| d.1.4   | -2.276   | 348.5  | 0.7792   | 5.6318         |
| d.1.5   | 275.541  | 236.0  | 0.5278   | 1.2007         |
| d.1.6   | 227.596  | 894.0  | 1.9990   | 0.7175         |
| sd.d    | 293.973  | 132.6  | 0.2964   | 1.1397         |
| beta[2] | -668.542 | 661.5  | 1.4792   | 8.3149         |
| beta[3] | -367.752 | 325.7  | 0.7283   | 69.7450        |
| beta[4] | -18.942  | 1130.5 | 2.5279   | 285.7163       |
| beta[5] | -674.084 | 692.6  | 1.5487   | 101.8300       |
| beta[6] | -104.112 | 1549.4 | 3.4646   | 5.4004         |

2. Quantiles for each variable:

|         | 2.5%     | 25%      | 50%      | 75%     | 97.5%   |
|---------|----------|----------|----------|---------|---------|
| d.1.2   | -311.35  | 23.88    | 134.828  | 248.53  | 559.21  |
| d.1.3   | -321.11  | -86.17   | -9.645   | 60.41   | 291.24  |
| d.1.4   | -711.73  | -197.28  | -16.957  | 190.93  | 735.67  |
| d.1.5   | -220.59  | 150.49   | 282.475  | 392.60  | 777.05  |
| d.1.6   | -641.77  | -420.26  | -171.748 | 771.00  | 2088.87 |
| sd.d    | 51.48    | 184.49   | 349.846  | 401.60  | 433.28  |
| beta[2] | -1399.47 | -1268.76 | -804.363 | -174.30 | 295.60  |
| beta[3] | -1036.76 | -631.15  | -284.033 | -85.29  | 82.78   |
| beta[4] | -1743.34 | -609.39  | -37.844  | 316.03  | 3782.31 |
| beta[5] | -2168.57 | -1045.81 | -620.733 | -124.82 | 424.51  |
| beta[6] | -1349.65 | -1315.02 | -785.369 | 446.97  | 2492.09 |

-- Model fit (residual deviance):

| Dbar     | pD       | DIC      |
|----------|----------|----------|
| 25.99697 | 25.99628 | 51.99325 |

26 data points, ratio 0.9999, I<sup>2</sup> = 4%

### Intensity

1. Empirical mean and standard deviation for each variable, plus standard error of the mean:

|         | Mean     | SD     | Naive SE | Time-series SE |
|---------|----------|--------|----------|----------------|
| d.1.2   | 132.762  | 209.6  | 0.4688   | 0.4453         |
| d.1.3   | -12.647  | 144.6  | 0.3234   | 0.3232         |
| d.1.4   | -2.276   | 348.5  | 0.7792   | 5.6318         |
| d.1.5   | 275.541  | 236.0  | 0.5278   | 1.2007         |
| d.1.6   | 227.596  | 894.0  | 1.9990   | 0.7175         |
| sd.d    | 293.973  | 132.6  | 0.2964   | 1.1397         |
| beta[2] | -668.542 | 661.5  | 1.4792   | 8.3149         |
| beta[3] | -367.752 | 325.7  | 0.7283   | 69.7450        |
| beta[4] | -18.942  | 1130.5 | 2.5279   | 285.7163       |
| beta[5] | -674.084 | 692.6  | 1.5487   | 101.8300       |
| beta[6] | -104.112 | 1549.4 | 3.4646   | 5.4004         |

2. Quantiles for each variable:

|         | 2.5%     | 25%      | 50%      | 75%     | 97.5%   |
|---------|----------|----------|----------|---------|---------|
| d.1.2   | -311.35  | 23.88    | 134.828  | 248.53  | 559.21  |
| d.1.3   | -321.11  | -86.17   | -9.645   | 60.41   | 291.24  |
| d.1.4   | -711.73  | -197.28  | -16.957  | 190.93  | 735.67  |
| d.1.5   | -220.59  | 150.49   | 282.475  | 392.60  | 777.05  |
| d.1.6   | -641.77  | -420.26  | -171.748 | 771.00  | 2088.87 |
| sd.d    | 51.48    | 184.49   | 349.846  | 401.60  | 433.28  |
| beta[2] | -1399.47 | -1268.76 | -804.363 | -174.30 | 295.60  |
| beta[3] | -1036.76 | -631.15  | -284.033 | -85.29  | 82.78   |
| beta[4] | -1743.34 | -609.39  | -37.844  | 316.03  | 3782.31 |
| beta[5] | -2168.57 | -1045.81 | -620.733 | -124.82 | 424.51  |
| beta[6] | -1349.65 | -1315.02 | -785.369 | 446.97  | 2492.09 |

-- Model fit (residual deviance):

| Dbar     | pD       | DIC      |
|----------|----------|----------|
| 25.99697 | 25.99628 | 51.99325 |

26 data points, ratio 0.9999, I<sup>2</sup> = 4%

### Length

## S15. GRADE assessment for major symptoms

Table S8 Summary of GRADE assessment for the certainty in hyperactivity/  
impulsivity

| Comparisons                               | Nature of evidence | Certainty | Reason for downgrading     |
|-------------------------------------------|--------------------|-----------|----------------------------|
| Closed-skill sports vs. multicomponent    | Indirect           | Low       | Imprecision, indirectness  |
| Closed-skill sports vs. HIIT              | Indirect           | Low       | Imprecision, indirectness  |
| Closed-skill sports vs. exergaming        | Indirect           | Low       | Imprecision, indirectness  |
| Closed-skill sports vs. open-skill sports | Indirect           | Low       | Imprecision, indirectness  |
| Closed-skill sports vs. control           | Mixed              | Moderate  | Risk of bias               |
| Multicomponent vs. HIIT                   | Mixed              | Low       | Imprecision                |
| Multicomponent vs. exergaming             | Indirect           | Low       | Imprecision, indirectness  |
| Multicomponent vs. open-skill sports      | Indirect           | Low       | Imprecision, indirectness  |
| Multicomponent vs. control                | Mixed              | Low       | Imprecision, inconsistency |
| HIIT vs. exergaming                       | Indirect           | Low       | Imprecision, indirectness  |
| HIIT vs. open-skill sports                | Indirect           | Low       | Imprecision, indirectness  |
| HIIT vs. control                          | Mixed              | Very low  | Imprecision, inconsistency |
| Exergaming vs. open-skill sports          | Indirect           | Low       | Imprecision, indirectness  |
| Exergaming vs. control                    | Mixed              | Low       | Imprecision, risk of bias  |
| Open-skill sports vs. control             | Mixed              | Very low  | Imprecision, inconsistency |

Table S9 Summary of GRADE assessment for the certainty in inattention

| Comparisons                               | Nature of evidence | Certainty | Reason for downgrading     |
|-------------------------------------------|--------------------|-----------|----------------------------|
| Closed-skill sports vs. HIIT              | Indirect           | Low       | Imprecision, indirectness  |
| Closed-skill sports vs. exergaming        | Indirect           | Low       | Imprecision, indirectness  |
| Closed-skill sports vs. open-skill sports | Indirect           | Low       | Imprecision, indirectness  |
| Closed-skill sports vs. multicomponent    | Indirect           | Very low  | Imprecision, indirectness  |
| Closed-skill sports vs. control           | Mixed              | High      | No downgrade               |
| HIIT vs. exergaming                       | Indirect           | Low       | Imprecision, indirectness  |
| HIIT vs. open-skill sports                | Indirect           | Low       | Imprecision, indirectness  |
| HIIT vs. multicomponent                   | Mixed              | Low       | Imprecision                |
| HIIT vs. control                          | Mixed              | Low       | Imprecision, risk of bias  |
| Exergaming vs. open-skill sports          | Indirect           | Low       | Imprecision, indirectness  |
| Exergaming vs. multicomponent             | Indirect           | Low       | Imprecision, indirectness  |
| Exergaming vs. control                    | Mixed              | Low       | Imprecision, risk of bias  |
| Open-skill sports vs. multicomponent      | Indirect           | Low       | Imprecision, indirectness  |
| Open-skill sports vs. control             | Mixed              | Very low  | Imprecision, inconsistency |
| Multicomponent vs. control                | Mixed              | Low       | Imprecision, risk of bias  |

S16. A partially contextualized framework

Table S10 A partially contextualized framework was used for classification of interventions based on network meta-analysis

| Outcomes                  | Classification             | Intervention            | Effect size          | Surface under the cumulative ranking curve | Certainty of evidence |
|---------------------------|----------------------------|-------------------------|----------------------|--------------------------------------------|-----------------------|
| <b>Inhibitory Control</b> | Large beneficial effect    | Open-skill activities   | 1.94 (1.24 to 2.64)  | 99.1%                                      | High                  |
|                           |                            | Closed-skill activities | 1.02 (0.54 to 1.50)  | 55.2%                                      | Moderate              |
|                           |                            | Multicomponent PA       | 1.00 (0.46 to 1.55)  | 54.4%                                      | Moderate              |
|                           | Moderate beneficial effect | Exergaming              | 0.79 (0.00 to 1.59)  | 40.6%                                      | Low                   |
| <b>Working memory</b>     | Large beneficial effect    | Closed-skill activities | 1.21 (-0.22 to 2.65) | 75.9%                                      | Moderate              |
|                           |                            | Multicomponent PA       | 1.05 (0.19 to 1.92)  | 71.3%                                      | Moderate              |
|                           | Moderate beneficial effect | Open-skill activities   | 0.65 (-1.59 to 2.89) | 52.2%                                      | Low                   |
|                           | Trivial to no effect       | Exergaming              | 0.00 (-2.08 to 2.08) | 29.7%                                      | Very low              |

| Outcomes                         | Classification             | Intervention                     | Effect size            | Surface under the cumulative ranking curve | Certainty of evidence |
|----------------------------------|----------------------------|----------------------------------|------------------------|--------------------------------------------|-----------------------|
| <b>Cognitive flexibility</b>     | Large beneficial effect    | Multicomponent PA                | 1.44 (-0.19 to 3.07)   | 70.3%                                      | Moderate              |
|                                  |                            | Open-skill activities            | 1.43 (-0.24 to 3.11)   | 70.0%                                      | Low                   |
|                                  |                            | Closed-skill activities          | 1.14 (0.09 to 2.20)    | 60.6%                                      | Low                   |
|                                  | Moderate beneficial effect | Exergaming                       | 0.58 (-1.64 to 2.79)   | 38.9%                                      | Low                   |
| <b>Hyperactivity/impulsivity</b> | Large beneficial effect    | Closed-skill activities          | -1.60 (-0.32 to -0.19) | 72.5%                                      | Moderate              |
|                                  |                            | Multicomponent PA                | -1.58 (-3.60 to 0.43)  | 71.3%                                      | Low                   |
|                                  |                            | High-intensity interval training | -0.97 (-3.77 to 1.83)  | 54.2%                                      | Very low              |
|                                  | Small beneficial effect    | Exergaming                       | -0.28 (-3.96 to 3.40)  | 40.0%                                      | Low                   |
|                                  |                            | Open-skill activities            | -0.25 (-4.05 to 3.55)  | 38.2%                                      | Very low              |

| Outcomes           | Classification          | Intervention                     | Effect size            | Surface under the cumulative ranking curve | Certainty of evidence |
|--------------------|-------------------------|----------------------------------|------------------------|--------------------------------------------|-----------------------|
| <b>Inattention</b> | Large beneficial effect | Closed-skill activities          | -1.51 (-2.33 to -0.69) | 96.3%                                      | High                  |
|                    | Small beneficial effect | High-intensity interval training | -0.28 (-1.54 to 0.98)  | 52.1%                                      | Low                   |
|                    | Trivial to no effect    | Exergaming                       | -0.02 (-1.65 to 1.61)  | 39.4%                                      | Low                   |
|                    |                         | Multicomponent PA                | -0.02 (-0.89 to 0.85)  | 37.6%                                      | Low                   |
|                    | Small harmful effect    | Open-skill activities            | 0.04 (-1.87 to 1.94)   | 38.1%                                      | Very low              |
